# Supplementary material for: miR-34 regulates stress-induced depression-like state through the WDR26 ortholog melancholy in Drosophila
Source: Research Square preprint supplement (doi:10.21203/rs.3.rs-9339604/v1), 2026-04-08
Supplement: Supplementary file 1 [file 4be8380a55e7540d4ec19e03.xlsx]

## Sheet: Sheet1
significant_proteins_filtered
Protein	Label	log2FC	SE	Tvalue	DF	pvalue	adj.pvalue	issue	MissingPercentage	ImputationPercentage	SigFlag	Regulation	Type
A0A023GPN7;A4V4N7;B7Z0Z5;B7Z0Z6;M9NFA0;Q9VXC4;X2JC90;X2JFS7	Stress_vs_OE	0.637381	0.147066	4.33397	12	0.000971885	0.00528434	NA	0.208333	0.208333	Significant	Up	Statistical
A0A0B4JD38;A0A0B4K738;A0A0B4KEJ9;A0A0B4KEQ3;A0A0B4KF87;A0A0B4KFK3;A0A0C4DHC4;A8DY93;A8DY94	Stress_vs_OE	0.682965	0.155371	4.39571	11	0.0010708	0.00568736	NA	0.0416667	0.0416667	Significant	Up	Statistical
A0A0B4K6K8;A0A0B4KGY9;A0A0B4KHV4;Q8IMS8;Q9VBQ1	Stress_vs_OE	0.67999	0.162808	4.17663	12	0.00128419	0.00645719	NA	0.216667	0.216667	Significant	Up	Statistical
A0A0B4K6X5	Stress_vs_OE	0.697843	0.140399	4.97043	12	0.00032503	0.00227879	NA	0.194444	0.194444	Significant	Up	Statistical
A0A0B4K6X5	Control_vs_OE	0.704401	0.140399	5.01715	12	0.000300563	0.00355757	NA	0.25	0.25	Significant	Up	Statistical
A0A0B4K765;A0A0B4LF82;A0A0B4LF93;A0A126GUN9;A1Z927;A1Z928;Q5U0Y0	Stress_vs_OE	0.885394	0.0855888	10.3447	12	2.48015e-07	1.42024e-05	NA	0.275641	0.275641	Significant	Up	Statistical
A0A0B4K765;A0A0B4LF82;A0A0B4LF93;A0A126GUN9;A1Z927;A1Z928;Q5U0Y0	Control_vs_OE	0.649242	0.0855888	7.5856	12	6.45358e-06	0.000225826	NA	0.391026	0.391026	Significant	Up	Statistical
A0A0B4K7H1;A0A0B4K819;A1Z6P2	Control_vs_Stress	0.673288	0.125392	5.36948	11	0.000226963	0.00454395	NA	0	0	Significant	Up	Statistical
A0A0B4K7K9;A8DY79	Stress_vs_OE	1.17498	0.179768	6.53611	12	2.78535e-05	0.000382457	NA	0.128136	0.128136	Significant	Up	Statistical
A0A0B4K7K9;A8DY79	Control_vs_OE	1.39742	0.179768	7.7735	12	5.03893e-06	0.000192591	NA	0.357527	0.357527	Significant	Up	Statistical
A0A0B4K7Y4;A0A0B4KFL2;A1Z9D9;A1Z9E0	Control_vs_Stress	-0.663971	0.164739	-4.03045	12	0.00166786	0.0170426	NA	0.277778	0.277778	Significant	Down	Statistical
A0A0B4KER0;Q5U156	Stress_vs_OE	0.601074	0.0515958	11.6497	12	6.72273e-08	6.04914e-06	NA	0.130208	0.130208	Significant	Up	Statistical
A0A0B4KF38	Stress_vs_OE	0.839279	0.200824	4.17917	10	0.0018902	0.00866547	NA	0	0	Significant	Up	Statistical
A0A0B4KF38	Control_vs_OE	0.88671	0.200824	4.41535	10	0.00130352	0.0105014	NA	0.416667	0	Significant	Up	Statistical
A0A0B4KFB8	Stress_vs_OE	0.688611	0.0573825	12.0004	12	4.83428e-08	4.82272e-06	NA	0.152778	0.152778	Significant	Up	Statistical
A0A0B4KFF6;A8DY77;Q7K304	Stress_vs_OE	1.22344	0.298527	4.09826	12	0.00147694	0.00720266	NA	0.202381	0.202381	Significant	Up	Statistical
A0A0B4KFF6;A8DY77;Q7K304	Control_vs_OE	1.87113	0.298527	6.26788	12	4.1419e-05	0.000829103	NA	0.5	0.5	Significant	Up	Statistical
A0A0B4KG96;Q9N6D7	Control_vs_OE	0.642399	0.104128	6.16929	10	0.000105614	0.00162227	NA	0.5	0.416667	Significant	Up	Statistical
A0A0B4KHW3	Stress_vs_OE	0.73674	0.249943	2.94763	12	0.0121979	0.0350948	NA	0.0833333	0.0833333	Significant	Up	Statistical
A0A0B4KI23	Stress_vs_OE	0.807079	0.140523	5.74338	12	9.25906e-05	0.000927726	NA	0	0	Significant	Up	Statistical
A0A0B4KI23	Control_vs_Stress	-1.47023	0.140523	-10.4626	12	2.19247e-07	3.59252e-05	NA	0	0	Significant	Down	Statistical
A0A0B4KI23	Control_vs_OE	-0.663154	0.140523	-4.71917	12	0.000497682	0.00522634	NA	0	0	Significant	Down	Statistical
A0A0B4LF29;A0A0B4LFC7;A0A126GUP1;A1Z9M3;A1Z9M4;A8DYD1;A8DYD2;A8DYD3;B7YZE6;Q7KHK4	Stress_vs_OE	0.683232	0.164708	4.14815	12	0.00135104	0.00666658	NA	0.25	0.25	Significant	Up	Statistical
A0A0B4LFQ3;A0A0B4LFV0;A0A0B4LGY8;A1ZBH7;A1ZBH8	Stress_vs_OE	0.638722	0.191411	3.33692	12	0.00592178	0.0205095	NA	0.125	0.125	Significant	Up	Statistical
A0A0B4LGB7	Stress_vs_OE	-0.624021	0.110041	-5.67078	12	0.00010381	0.00101358	NA	0	0	Significant	Down	Statistical
A0A0B4LH25;A8DYK5;Q9W2K4	Stress_vs_OE	0.783464	0.10317	7.59391	11	1.06817e-05	0.000193317	NA	0.180556	0.180556	Significant	Up	Statistical
A0A0B4LH25;A8DYK5;Q9W2K4	Control_vs_OE	0.738754	0.10317	7.16054	11	1.84355e-05	0.000464332	NA	0.347222	0.263889	Significant	Up	Statistical
A0A0C4DHB3;A8JR16;A8JR17	Stress_vs_OE	-0.774737	0.140456	-5.51586	12	0.000132835	0.00120948	NA	0.458333	0.208333	Significant	Down	Statistical
A0A0C4DHE7	Control_vs_Stress	-0.600601	0.126537	-4.74644	12	0.000475001	0.007543	NA	0.0416667	0.0416667	Significant	Down	Statistical
A0A126GUM1;A0A6M3Q7H0;A1Z8A4;A1Z8A6;Q7K0T7	Stress_vs_OE	0.677015	0.148639	4.55475	12	0.000660714	0.00394794	NA	0.216667	0.216667	Significant	Up	Statistical
A0A126GV33;Q9VA29	Stress_vs_OE	0.844555	0.160348	5.26702	11	0.000265535	0.00198136	NA	0.0416667	0.0416667	Significant	Up	Statistical
A0A4P1SA55;Q8IPA2	Stress_vs_OE	0.60996	0.122548	4.97732	12	0.000321294	0.00226833	NA	0.190476	0.190476	Significant	Up	Statistical
A0A4P1SA55;Q8IPA2	Control_vs_Stress	-0.843512	0.122548	-6.88313	12	1.69091e-05	0.000736803	NA	0.315476	0.315476	Significant	Down	Statistical
A0A6H2EFG8	Stress_vs_OE	0.998807	0.103355	9.66383	10	2.17271e-06	6.69164e-05	NA	0	0	Significant	Up	Statistical
A0A6H2EFG8	Control_vs_OE	0.738767	0.103355	7.14785	10	3.11278e-05	0.000686008	NA	0.166667	0	Significant	Up	Statistical
A1YK02	Stress_vs_OE	1.15683	0.237522	4.8704	12	0.000384718	0.00259247	NA	0.166667	0.166667	Significant	Up	Statistical
A1YK02	Control_vs_OE	0.957146	0.237522	4.02971	12	0.00167007	0.0125091	NA	0.361111	0.361111	Significant	Up	Statistical
A1Z6G9	Stress_vs_OE	0.665047	0.134008	4.96274	12	0.000329257	0.00229979	NA	0.166667	0.166667	Significant	Up	Statistical
A1Z6G9	Control_vs_OE	0.597137	0.134008	4.45598	12	0.000784634	0.00723695	NA	0.375	0.375	Significant	Up	Statistical
A1Z6H7	Stress_vs_OE	0.954925	0.122558	7.79163	12	4.92111e-06	0.000111635	NA	0.255556	0.255556	Significant	Up	Statistical
A1Z6H7	Control_vs_OE	0.982135	0.122558	8.01364	12	3.69486e-06	0.000162858	NA	0.488889	0.488889	Significant	Up	Statistical
A1Z6Q0;A4UZ58	Control_vs_OE	-0.672355	0.212071	-3.17042	12	0.00806338	0.038583	NA	0.472222	0.472222	Significant	Down	Statistical
A1Z782;A1Z783	Stress_vs_OE	0.886128	0.100804	8.79058	12	1.41474e-06	4.73886e-05	NA	0.0416667	0.0416667	Significant	Up	Statistical
A1Z784;Q7JV23	Stress_vs_OE	0.700032	0.231545	3.02331	12	0.0105975	0.0316408	NA	0.0954641	0.0954641	Significant	Up	Statistical
A1Z7G2	Control_vs_Stress	-1.4379	0.325409	-4.41875	11	0.00103064	0.0121246	NA	0.458333	0.375	Significant	Down	Statistical
A1Z7G2	Control_vs_OE	-1.25238	0.328178	-3.81615	11	0.00286212	0.0185573	NA	0.375	0.291667	Significant	Down	Statistical
A1Z893	Stress_vs_OE	0.626344	0.180596	3.46821	11	0.00525651	0.0187721	NA	0.25	0.25	Significant	Up	Statistical
A1Z893	Control_vs_Stress	-0.697582	0.178831	-3.90079	11	0.00247319	0.0213321	NA	0.416667	0.333333	Significant	Down	Statistical
A1Z8D3	Stress_vs_OE	0.7069	0.132354	5.34098	12	0.000176174	0.00149438	NA	0.108333	0.108333	Significant	Up	Statistical
A1Z8M2;A8DYA3	Stress_vs_OE	0.654134	0.14605	4.47883	12	0.000753952	0.00435206	NA	0.366667	0.366667	Significant	Up	Statistical
A1Z8M2;A8DYA3	Control_vs_OE	0.778254	0.14605	5.32868	12	0.000179736	0.00242326	NA	0.5	0.5	Significant	Up	Statistical
A1Z8N1	Stress_vs_OE	0.608519	0.207062	2.93882	12	0.0123991	0.0355623	NA	0.0416667	0.0416667	Significant	Up	Statistical
A1Z8N1	Control_vs_Stress	-0.65132	0.207062	-3.14553	12	0.0084448	0.0470203	NA	0.0625	0.0625	Significant	Down	Statistical
A1Z8P9	Stress_vs_OE	0.823806	0.1021	8.06864	12	3.44463e-06	8.9027e-05	NA	0.213178	0.213178	Significant	Up	Statistical
A1Z8P9	Control_vs_OE	0.933281	0.1021	9.14087	12	9.36795e-07	5.96426e-05	NA	0.459302	0.459302	Significant	Up	Statistical
A1Z8Q0	Control_vs_OE	-1.15516	0.375422	-3.07696	12	0.00959193	0.0439694	NA	0.0833333	0.0833333	Significant	Down	Statistical
A1Z992	Stress_vs_OE	0.623222	0.172905	3.60442	12	0.00361644	0.0140877	NA	0.0747126	0.0747126	Significant	Up	Statistical
A1Z9E2	Stress_vs_OE	0.88889	0.151513	5.86676	11	0.000108217	0.00104549	NA	0.309524	0.309524	Significant	Up	Statistical
A1Z9M5	Control_vs_OE	0.611852	0.0645688	9.47597	12	6.38612e-07	4.46931e-05	NA	0.257576	0.257576	Significant	Up	Statistical
A1ZA22	Stress_vs_OE	0.673675	0.106575	6.32115	12	3.82509e-05	0.0004757	NA	0.166667	0.166667	Significant	Up	Statistical
A1ZA47	Stress_vs_OE	0.946561	0.135348	6.99355	12	1.44736e-05	0.000239781	NA	0.0878378	0.0878378	Significant	Up	Statistical
A1ZA47	Control_vs_OE	1.21479	0.135348	8.97536	12	1.13651e-06	6.76595e-05	NA	0.308559	0.308559	Significant	Up	Statistical
A1ZAL1	Control_vs_OE	-0.848386	0.198314	-4.278	11	0.00130308	0.0105014	NA	0	0	Significant	Down	Statistical
A1ZAN2;A4UZL2;A4UZL3;B7YZI1	Stress_vs_OE	0.790843	0.196331	4.02812	11	0.00198838	0.0090254	NA	0.375	0.375	Significant	Up	Statistical
A1ZAX6;A1ZAX8	Stress_vs_OE	0.681387	0.201373	3.3837	12	0.0054309	0.01926	NA	0.222222	0.222222	Significant	Up	Statistical
A1ZAZ2	Stress_vs_OE	0.75646	0.101506	7.45234	12	7.7112e-06	0.000150582	NA	0.391026	0.391026	Significant	Up	Statistical
A1ZB61	Control_vs_OE	1.11648	0.221301	5.04505	12	0.000286879	0.00343356	NA	0	0	Significant	Up	Statistical
A1ZBB4;A8E6M1;E1JGL8	Stress_vs_OE	-1.08274	0.359649	-3.01054	12	0.0108521	0.0322026	NA	0.583333	0.583333	Significant	Down	Statistical
A1ZBU8	Stress_vs_OE	1.11957	0.361264	3.09902	12	0.00920673	0.0283895	NA	0.141667	0.141667	Significant	Up	Statistical
A1ZBU8	Control_vs_Stress	-1.14862	0.361264	-3.17944	12	0.0079295	0.0454189	NA	0.258333	0.258333	Significant	Down	Statistical
A8E6R2;Q9VNR7	Stress_vs_OE	0.591035	0.0732687	8.06668	12	3.45321e-06	8.9027e-05	NA	0.194444	0.194444	Significant	Up	Statistical
A8JNQ4;M9NFQ7	Stress_vs_OE	0.659433	0.175007	3.76803	12	0.00268139	0.0113096	NA	0.4	0.4	Significant	Up	Statistical
A8JQT5	Control_vs_OE	0.717526	0.18687	3.8397	11	0.00274796	0.0181247	NA	0.458333	0.375	Significant	Up	Statistical
A8JQV7	Control_vs_Stress	0.610219	0.107489	5.67703	12	0.000102789	0.00267193	NA	0	0	Significant	Up	Statistical
A8JQV7	Control_vs_OE	1.18151	0.107489	10.9919	12	1.27735e-07	1.39414e-05	NA	0	0	Significant	Up	Statistical
A8JUZ6;Q9W426;X2JAM0;X2JCR6	Stress_vs_OE	0.831758	0.0965229	8.61721	12	1.74296e-06	5.75428e-05	NA	0.15625	0.15625	Significant	Up	Statistical
A8JUZ6;Q9W426;X2JAM0;X2JCR6	Control_vs_OE	0.72761	0.0965229	7.53821	12	6.87363e-06	0.000233398	NA	0.25	0.25	Significant	Up	Statistical
A8Y596;A8Y599;A8Y5A0;Q7PLC6;Q7PLC7	Control_vs_OE	0.729433	0.160281	4.55096	12	0.000665074	0.00645911	NA	0.358333	0.358333	Significant	Up	Statistical
B7Z001;Q9VQL7	Stress_vs_OE	0.959048	0.33672	2.84821	12	0.0146715	0.0407059	NA	0.0636161	0.0636161	Significant	Up	Statistical
B7Z005;E1JHR0;Q9VPU3	Stress_vs_OE	0.592031	0.129563	4.56946	12	0.000644081	0.0038687	NA	0.166667	0.166667	Significant	Up	Statistical
B7Z0L0;B7Z0L1	Control_vs_Stress	0.639485	0.067674	9.44948	12	6.57999e-07	7.54725e-05	NA	0	0	Significant	Up	Statistical
B7Z100;B7Z103	Stress_vs_OE	-0.936202	0.269609	-3.47244	10	0.00599653	0.0207214	NA	0.0833333	0	Significant	Down	Statistical
C0HK92	Control_vs_Stress	0.749973	0.100017	7.49842	12	7.24894e-06	0.000420989	NA	0.119048	0.119048	Significant	Up	Statistical
C0HK92	Control_vs_OE	0.82241	0.100017	8.22267	12	2.83552e-06	0.000135396	NA	0.18254	0.18254	Significant	Up	Statistical
C0HK95	Stress_vs_OE	-0.915961	0.140484	-6.52004	12	2.85155e-05	0.000387153	NA	0.0595238	0.0595238	Significant	Down	Statistical
C0HK95	Control_vs_Stress	0.672531	0.140484	4.78724	12	0.000443055	0.00720829	NA	0.0119048	0.0119048	Significant	Up	Statistical
C0HL66;C0HL67;P02299	Stress_vs_OE	0.880962	0.149557	5.89048	12	7.3605e-05	0.000794761	NA	0.0520833	0.0520833	Significant	Up	Statistical
C0HL66;C0HL67;P02299	Control_vs_OE	1.02803	0.149557	6.87387	12	1.71323e-05	0.000441204	NA	0.09375	0.09375	Significant	Up	Statistical
D0IQJ8;M9PG83	Control_vs_Stress	-0.77402	0.109703	-7.05561	12	1.32715e-05	0.000608894	NA	0	0	Significant	Down	Statistical
D3DMM0;Q2PDT4;Q8INW7;Q9VIX2;Q9VIX3	Control_vs_OE	0.719965	0.0591663	12.1685	12	4.13941e-08	6.7768e-06	NA	0.192308	0.192308	Significant	Up	Statistical
E1JGK8	Stress_vs_OE	0.724913	0.144412	5.01975	12	0.000299255	0.00215925	NA	0.0833333	0.0833333	Significant	Up	Statistical
E1JGK8	Control_vs_OE	0.711125	0.144412	4.92428	12	0.000351263	0.00403556	NA	0.166667	0.166667	Significant	Up	Statistical
E1JHJ3	Stress_vs_OE	-3.94963	0.348264	-11.3409	12	9.0513e-08	6.92274e-06	NA	0.395833	0.395833	Significant	Down	Statistical
E1JHJ3	Control_vs_Stress	3.70151	0.348264	10.6284	12	1.8466e-07	3.53009e-05	NA	0.0416667	0.0416667	Significant	Up	Statistical
E1JI59;Q6U9V3;Q7KTX2;Q9VP80	Stress_vs_OE	0.625247	0.149566	4.18041	13	0.00107823	0.00571363	NA	0.291667	0.291667	Significant	Up	Statistical
E1JI91;Q9VSW1	Stress_vs_OE	0.714337	0.206866	3.45314	12	0.00477719	0.0173438	NA	0.0574713	0.0574713	Significant	Up	Statistical
E1JIJ4	Stress_vs_OE	-Inf	NA	NA	NA	NA	0	oneCo	0.833333	0	Significant	Down	Statistical
E1JIJ4	Control_vs_Stress	Inf	NA	NA	NA	NA	0	oneCo	0.666667	0	Significant	Up	Statistical
E1JJH5	Stress_vs_OE	0.662846	0.141049	4.69941	12	0.000514828	0.00324972	NA	0.166667	0.166667	Significant	Up	Statistical
E2QCN9	Stress_vs_OE	0.58698	0.0561748	10.4492	12	2.2233e-07	1.36036e-05	NA	0.0833333	0.0833333	Significant	Up	Statistical
E2QCS8;M9PE28;Q9VQ76	Stress_vs_OE	0.956791	0.228525	4.18681	12	0.00126114	0.00637378	NA	0.154762	0.154762	Significant	Up	Statistical
E2QCZ0	Stress_vs_OE	0.640108	0.117954	5.42675	12	0.000153308	0.00134519	NA	0	0	Significant	Up	Statistical
E8NH67;Q9W5X1	Stress_vs_OE	0.755979	0.0950517	7.95334	12	3.99172e-06	9.69989e-05	NA	0.106061	0.106061	Significant	Up	Statistical
E8NHA2;Q9W0H2	Stress_vs_OE	0.74324	0.102119	7.27817	12	9.76316e-06	0.000180658	NA	0.125	0.125	Significant	Up	Statistical
E8NHA2;Q9W0H2	Control_vs_OE	0.59751	0.102119	5.85111	12	7.82442e-05	0.00130426	NA	0.270833	0.270833	Significant	Up	Statistical
F3YDK4	Stress_vs_OE	0.629372	0.125361	5.02049	11	0.000389743	0.00261099	NA	0	0	Significant	Up	Statistical
G3JX32	Stress_vs_OE	Inf	NA	NA	NA	NA	0	oneCo	0.305556	0.305556	Significant	Up	Statistical
G3JX32	Control_vs_OE	Inf	NA	NA	NA	NA	0	oneCo	0.611111	0.111111	Significant	Up	Statistical
L0MPZ1	Stress_vs_OE	0.761494	0.0815761	9.33477	12	7.49536e-07	3.01721e-05	NA	0	0	Significant	Up	Statistical
M9MRX0	Stress_vs_OE	0.649353	0.0640404	10.1398	12	3.08197e-07	1.57146e-05	NA	0.100575	0.100575	Significant	Up	Statistical
M9MRX0	Control_vs_OE	0.738362	0.0640404	11.5296	12	7.54068e-08	1.0347e-05	NA	0.172414	0.172414	Significant	Up	Statistical
M9MSI3;Q9V3G8	Stress_vs_OE	1.18093	0.291013	4.05799	12	0.00158741	0.0075915	NA	0.339744	0.339744	Significant	Up	Statistical
M9MSK4	Control_vs_Stress	-0.6222	0.191414	-3.25055	11	0.00772772	0.0448227	NA	0.583333	0.5	Significant	Down	Statistical
M9NCP5;Q9VPY9	Control_vs_OE	0.675273	0.177292	3.80881	12	0.00248961	0.0169072	NA	0.3	0.3	Significant	Up	Statistical
M9NDG8;Q9VM80	Stress_vs_OE	0.695718	0.230705	3.01561	12	0.0107502	0.0319721	NA	0.116667	0.116667	Significant	Up	Statistical
M9NH88;M9PJQ5	Stress_vs_OE	-1.8434	0.180238	-10.2276	12	2.80684e-07	1.49774e-05	NA	0.316667	0.316667	Significant	Down	Statistical
M9NH88;M9PJQ5	Control_vs_Stress	1.56589	0.180238	8.68791	12	1.60021e-06	0.000156207	NA	0.0666667	0.0666667	Significant	Up	Statistical
M9PBA3	Stress_vs_OE	0.819943	0.252772	3.2438	12	0.00703684	0.0234	NA	0.0416667	0.0416667	Significant	Up	Statistical
M9PBA3	Control_vs_OE	1.3213	0.252772	5.22723	12	0.000212181	0.00274756	NA	0.125	0.125	Significant	Up	Statistical
M9PBY3;M9PEK7;M9PEU6;M9PF18;M9PHU7	Stress_vs_OE	0.676023	0.134393	5.03018	12	0.000294085	0.00212864	NA	0.222222	0.222222	Significant	Up	Statistical
M9PC43	Stress_vs_OE	0.805082	0.111573	7.21572	12	1.06349e-05	0.000193317	NA	0.0416667	0.0416667	Significant	Up	Statistical
M9PC43	Control_vs_Stress	-0.961225	0.111573	-8.61518	12	1.74725e-06	0.00016133	NA	0.0833333	0.0833333	Significant	Down	Statistical
M9PDB4	Control_vs_OE	0.584265	0.135677	4.3063	12	0.00102048	0.00880958	NA	0	0	Significant	Up	Statistical
M9PET3;M9PF79;Q0E8G1;Q960V1	Control_vs_OE	0.67177	0.142916	4.70045	12	0.000513913	0.00532981	NA	0.125	0.125	Significant	Up	Statistical
M9PF85;Q7JVP2	Stress_vs_OE	0.60175	0.0851633	7.06583	12	1.30838e-05	0.000221847	NA	0.2	0.2	Significant	Up	Statistical
M9PF96;Q9VWC8	Stress_vs_OE	0.607858	0.119061	5.10544	12	0.000259449	0.00194712	NA	0.177083	0.177083	Significant	Up	Statistical
M9PFE5;M9PFI2;Q961X4;Q9VU76	Control_vs_OE	0.624429	0.175136	3.56539	10	0.00513498	0.0280892	NA	0.520833	0.354167	Significant	Up	Statistical
M9PG20;M9PG82;M9PID3;Q9VPB0	Stress_vs_OE	0.954187	0.161086	5.92347	12	6.99421e-05	0.000766025	NA	0.285714	0.285714	Significant	Up	Statistical
M9PGA7	Control_vs_Stress	0.857882	0.222145	3.86182	6	0.00834466	0.046868	NA	0.333333	0	Significant	Up	Statistical
M9PGW8;Q8IR86	Stress_vs_OE	0.6889	0.139869	4.92531	12	0.000350653	0.00241977	NA	0.183333	0.183333	Significant	Up	Statistical
M9PHB3	Stress_vs_OE	0.614433	0.198893	3.08926	8	0.0149063	0.0411334	NA	0.25	0	Significant	Up	Statistical
M9PHB3	Control_vs_OE	0.710378	0.192149	3.69701	8	0.00606864	0.0316985	NA	0.5	0	Significant	Up	Statistical
O01346	Control_vs_Stress	-Inf	NA	NA	NA	NA	0	oneCo	0.916667	0	Significant	Down	Statistical
O01346	Control_vs_OE	-Inf	NA	NA	NA	NA	0	oneCo	0.75	0	Significant	Down	Statistical
O01939	Stress_vs_OE	0.944236	0.146949	6.42558	12	3.27622e-05	0.000432677	NA	0.145833	0.145833	Significant	Up	Statistical
O01939	Control_vs_OE	0.86054	0.146949	5.85603	12	7.76484e-05	0.00130314	NA	0.270833	0.270833	Significant	Up	Statistical
O46040	Stress_vs_OE	0.709669	0.106286	6.67695	12	2.27026e-05	0.00033179	NA	0.125	0.125	Significant	Up	Statistical
O62602	Stress_vs_OE	0.625563	0.0735502	8.50525	12	1.99768e-06	6.26978e-05	NA	0.178571	0.178571	Significant	Up	Statistical
O62602	Control_vs_OE	0.59782	0.0735502	8.12805	12	3.19458e-06	0.000144374	NA	0.339286	0.339286	Significant	Up	Statistical
O76767	Stress_vs_OE	0.580309	0.163766	3.54352	12	0.00404458	0.0153171	NA	0.291667	0.291667	Significant	Up	Statistical
O76767	Control_vs_Stress	-0.664353	0.163766	-4.05671	12	0.00159106	0.0164409	NA	0.416667	0.416667	Significant	Down	Statistical
O76879	Stress_vs_OE	-0.851616	0.0843494	-10.0963	12	3.22876e-07	1.5932e-05	NA	0.28125	0.28125	Significant	Down	Statistical
O76879	Control_vs_Stress	1.46001	0.0843494	17.3091	12	7.48301e-10	6.86641e-07	NA	0.151042	0.151042	Significant	Up	Statistical
O76879	Control_vs_OE	0.608394	0.0843494	7.21278	12	1.06779e-05	0.000322022	NA	0.369792	0.369792	Significant	Up	Statistical
O76895	Stress_vs_OE	0.628356	0.184802	3.40016	12	0.00526817	0.0187885	NA	0.159722	0.159722	Significant	Up	Statistical
O76994	Stress_vs_OE	0.808469	0.22652	3.56909	12	0.00385885	0.0148186	NA	0.0833333	0.0833333	Significant	Up	Statistical
O77051	Stress_vs_OE	0.898834	0.24542	3.66243	9	0.00521578	0.0186848	NA	0.375	0.375	Significant	Up	Statistical
O77051	Control_vs_OE	0.990508	0.24542	4.03597	9	0.0029464	0.0189695	NA	0.583333	0.25	Significant	Up	Statistical
O77086	Stress_vs_OE	0.58708	0.158278	3.70916	12	0.00298536	0.0122429	NA	0.166667	0.166667	Significant	Up	Statistical
O77436	Stress_vs_OE	0.605837	0.118443	5.11499	12	0.000255371	0.0019323	NA	0.366667	0.366667	Significant	Up	Statistical
O97125	Stress_vs_OE	3.12233	0.0783896	39.8309	12	4.04121e-14	9.27256e-11	NA	0.310185	0.310185	Significant	Up	Statistical
O97125	Control_vs_Stress	-2.99699	0.0783896	-38.232	12	6.59472e-14	1.55867e-10	NA	0.615741	0.615741	Significant	Down	Statistical
O97183	Control_vs_OE	0.634886	0.103298	6.14617	12	4.97508e-05	0.000958226	NA	0.166667	0.166667	Significant	Up	Statistical
O97479	Stress_vs_OE	0.866573	0.277823	3.11915	12	0.0088688	0.0276621	NA	0.16369	0.16369	Significant	Up	Statistical
P00408	Control_vs_OE	-0.690587	0.105642	-6.53708	12	2.7814e-05	0.000640701	NA	0.075	0.075	Significant	Down	Statistical
P02283	Stress_vs_OE	0.842939	0.170983	4.92995	12	0.000347923	0.00240818	NA	0.0151515	0.0151515	Significant	Up	Statistical
P02283	Control_vs_OE	1.04932	0.170983	6.13696	12	5.04497e-05	0.000963589	NA	0.0606061	0.0606061	Significant	Up	Statistical
P02515	Stress_vs_OE	4.22356	0.377938	11.1753	12	1.06468e-07	7.88032e-06	NA	0.357843	0.357843	Significant	Up	Statistical
P02515	Control_vs_Stress	-3.49943	0.377938	-9.25927	12	8.17179e-07	8.52095e-05	NA	0.759804	0.759804	Significant	Down	Statistical
P02516	Stress_vs_OE	1.13201	0.0530812	21.3259	12	6.5838e-11	4.31615e-08	NA	0.0652174	0.0652174	Significant	Up	Statistical
P02516	Control_vs_Stress	-0.798039	0.0530812	-15.0343	12	3.78622e-09	2.1714e-06	NA	0.115942	0.115942	Significant	Down	Statistical
P02517	Stress_vs_OE	2.29927	0.0517107	44.4641	12	1.08802e-14	4.99292e-11	NA	0.214286	0.214286	Significant	Up	Statistical
P02517	Control_vs_Stress	-1.97188	0.0517107	-38.1328	12	6.79456e-14	1.55867e-10	NA	0.420635	0.420635	Significant	Down	Statistical
P02518	Stress_vs_OE	1.38694	0.0584708	23.7202	12	1.88756e-11	2.1655e-08	NA	0.149123	0.149123	Significant	Up	Statistical
P02518	Control_vs_Stress	-1.07174	0.0584708	-18.3294	12	3.85197e-10	5.89094e-07	NA	0.320175	0.320175	Significant	Down	Statistical
P02572	Control_vs_Stress	-0.884004	0.216603	-4.08123	12	0.00152267	0.015921	NA	0	0	Significant	Down	Statistical
P02825;P82910	Stress_vs_OE	1.80398	0.207944	8.67534	11	2.99851e-06	8.28924e-05	NA	0.469697	0.469697	Significant	Up	Statistical
P02825;P82910	Control_vs_Stress	-1.86886	0.204506	-9.13841	11	1.80495e-06	0.00016133	NA	0.856061	0.772727	Significant	Down	Statistical
P02840	Stress_vs_OE	-0.93651	0.308197	-3.03867	8	0.0160957	0.0433724	NA	0.166667	0	Significant	Down	Statistical
P02843	Stress_vs_OE	1.13388	0.188912	6.00218	12	6.19602e-05	0.0006969	NA	0.047619	0.047619	Significant	Up	Statistical
P02843	Control_vs_OE	0.895625	0.188912	4.74097	12	0.000479463	0.00512321	NA	0.107143	0.107143	Significant	Up	Statistical
P02844	Stress_vs_OE	0.986505	0.243672	4.0485	12	0.00161466	0.00765464	NA	0.0511364	0.0511364	Significant	Up	Statistical
P02844	Control_vs_OE	0.822529	0.243672	3.37556	12	0.00551319	0.029593	NA	0.0852273	0.0852273	Significant	Up	Statistical
P05552	Stress_vs_OE	0.630921	0.109279	5.77347	12	8.83232e-05	0.000894736	NA	0.0833333	0.0833333	Significant	Up	Statistical
P05812	Stress_vs_OE	0.641119	0.124004	5.17016	12	0.000233092	0.0018379	NA	0.0416667	0.0416667	Significant	Up	Statistical
P06607	Stress_vs_OE	1.28699	0.25012	5.14549	12	0.000242788	0.0018884	NA	0.0533333	0.0533333	Significant	Up	Statistical
P06607	Control_vs_OE	1.08718	0.25012	4.34665	12	0.000950431	0.00836234	NA	0.0966667	0.0966667	Significant	Up	Statistical
P07909	Stress_vs_OE	-0.600968	0.200697	-2.99441	12	0.0111823	0.0327028	NA	0.316667	0.316667	Significant	Down	Statistical
P08144;P81641	Control_vs_Stress	-1.2387	0.326856	-3.78973	11	0.00299609	0.0241583	NA	0.633333	0.466667	Significant	Down	Statistical
P08266	Stress_vs_OE	0.844188	0.0459962	18.3534	12	3.79387e-10	1.58273e-07	NA	0.112745	0.112745	Significant	Up	Statistical
P08266	Control_vs_OE	0.691452	0.0459962	15.0328	12	3.7905e-09	1.5147e-06	NA	0.294118	0.294118	Significant	Up	Statistical
P08985	Stress_vs_OE	1.07687	0.178153	6.04463	12	5.80608e-05	0.000664441	NA	0.0625	0.0625	Significant	Up	Statistical
P08985	Control_vs_OE	0.997168	0.178153	5.59726	12	0.000116645	0.00174739	NA	0.222222	0.222222	Significant	Up	Statistical
P0DKM0	Stress_vs_OE	0.60734	0.120539	5.03853	12	0.000290017	0.00210583	NA	0.05	0.05	Significant	Up	Statistical
P11929	Stress_vs_OE	1.4161	0.215009	6.58622	8	0.000171839	0.00147672	NA	0.333333	0.166667	Significant	Up	Statistical
P11929	Control_vs_Stress	-1.15813	0.196276	-5.90053	8	0.000361528	0.00633088	NA	0.375	0.208333	Significant	Down	Statistical
P14318	Stress_vs_OE	-0.818531	0.0857422	-9.54642	12	5.89986e-07	2.62859e-05	NA	0.0897436	0.0897436	Significant	Down	Statistical
P18091	Control_vs_OE	0.64455	0.153511	4.19873	12	0.00123469	0.0101249	NA	0.106061	0.106061	Significant	Up	Statistical
P19967	Stress_vs_OE	1.0421	0.227501	4.58064	12	0.000631731	0.00381449	NA	0.0539216	0.0539216	Significant	Up	Statistical
P20007	Control_vs_Stress	0.781996	0.166233	4.70421	12	0.000510603	0.0078877	NA	0.149306	0.149306	Significant	Up	Statistical
P20240	Stress_vs_OE	-0.6151	0.216564	-2.84027	12	0.0148894	0.0411297	NA	0.3	0.3	Significant	Down	Statistical
P20240	Control_vs_OE	-0.920768	0.216564	-4.25171	12	0.00112389	0.0093842	NA	0.166667	0.166667	Significant	Down	Statistical
P22810	Stress_vs_OE	Inf	NA	NA	NA	NA	0	oneCo	0.583333	0	Significant	Up	Statistical
P22810	Control_vs_OE	Inf	NA	NA	NA	NA	0	oneCo	0.666667	0	Significant	Up	Statistical
P22978	Stress_vs_OE	Inf	NA	NA	NA	NA	0	oneCo	0.479167	0.229167	Significant	Up	Statistical
P22978	Control_vs_Stress	-0.985288	0.159288	-6.18558	7	0.000451556	0.00726927	NA	0.916667	0.166667	Significant	Down	Statistical
P22978	Control_vs_OE	Inf	NA	NA	NA	NA	0	oneCo	0.5625	0.0625	Significant	Up	Statistical
P26802	Stress_vs_OE	-0.676152	0.153854	-4.39475	12	0.000873394	0.00484644	NA	0	0	Significant	Down	Statistical
P26802	Control_vs_Stress	1.18466	0.153854	7.69986	12	5.54931e-06	0.000353614	NA	0	0	Significant	Up	Statistical
P28466	Stress_vs_OE	0.835615	0.218205	3.8295	5	0.012254	0.0352075	NA	0.5	0	Significant	Up	Statistical
P35415	Control_vs_OE	0.589356	0.076477	7.70632	12	5.50237e-06	0.000200771	NA	0.124611	0.124611	Significant	Up	Statistical
P35416	Stress_vs_OE	1.03998	0.0666107	15.6129	12	2.45645e-09	5.09716e-07	NA	0.0166667	0.0166667	Significant	Up	Statistical
P35416	Control_vs_OE	0.778695	0.0666107	11.6902	12	6.46833e-08	1.02244e-05	NA	0.0416667	0.0416667	Significant	Up	Statistical
P36958	Stress_vs_OE	0.661309	0.0838349	7.88823	11	7.46536e-06	0.000147666	NA	0.166667	0.0833333	Significant	Up	Statistical
P42281	Stress_vs_OE	0.587469	0.163703	3.58863	12	0.00372283	0.0143824	NA	0.0984848	0.0984848	Significant	Up	Statistical
P45884	Control_vs_Stress	-Inf	NA	NA	NA	NA	0	oneCo	0.833333	0	Significant	Down	Statistical
P45884	Control_vs_OE	-Inf	NA	NA	NA	NA	0	oneCo	0.583333	0	Significant	Down	Statistical
P47948	Stress_vs_OE	-Inf	NA	NA	NA	NA	0	oneCo	0.625	0.125	Significant	Down	Statistical
P47948	Control_vs_Stress	Inf	NA	NA	NA	NA	0	oneCo	0.1875	0.1875	Significant	Up	Statistical
P47949	Stress_vs_OE	-2.97287	0.20878	-14.2393	12	7.03705e-09	9.98686e-07	NA	0.433333	0.433333	Significant	Down	Statistical
P47949	Control_vs_Stress	2.42791	0.20878	11.629	12	6.85624e-08	1.96603e-05	NA	0.15	0.15	Significant	Up	Statistical
P48596	Stress_vs_OE	-0.645253	0.0829153	-7.78207	12	4.98284e-06	0.000111635	NA	0.0744048	0.0744048	Significant	Down	Statistical
P54195	Control_vs_Stress	0.920744	0.140496	6.5535	12	2.71548e-05	0.000996691	NA	0.395833	0.395833	Significant	Up	Statistical
P54195	Control_vs_OE	0.722977	0.140496	5.14587	12	0.000242637	0.00306404	NA	0.583333	0.583333	Significant	Up	Statistical
P54398	Stress_vs_OE	-2.82006	0.624506	-4.51565	12	0.000707126	0.00414962	NA	0.291667	0.291667	Significant	Down	Statistical
P54398	Control_vs_Stress	2.52737	0.624506	4.04699	12	0.00161906	0.0166552	NA	0.0416667	0.0416667	Significant	Up	Statistical
P82712	Stress_vs_OE	0.896198	0.193862	4.62287	12	0.000587278	0.00360296	NA	0.287037	0.287037	Significant	Up	Statistical
P82712	Control_vs_OE	0.722085	0.193862	3.72474	12	0.00290167	0.0187606	NA	0.481481	0.481481	Significant	Up	Statistical
P82713	Control_vs_Stress	-0.711834	0.135685	-5.24622	12	0.000205668	0.00428911	NA	0.722222	0.472222	Significant	Down	Statistical
P84040	Stress_vs_OE	0.900048	0.162567	5.53648	12	0.000128521	0.00118431	NA	0.0555556	0.0555556	Significant	Up	Statistical
P84040	Control_vs_OE	1.02668	0.162567	6.31542	12	3.85788e-05	0.000794974	NA	0.0972222	0.0972222	Significant	Up	Statistical
P84051	Control_vs_OE	1.37354	0.332456	4.13149	12	0.00139179	0.0110571	NA	0.347222	0.347222	Significant	Up	Statistical
P91621	Stress_vs_OE	0.950161	0.202616	4.68946	12	0.000523691	0.0032966	NA	0.231481	0.231481	Significant	Up	Statistical
P91621	Control_vs_OE	1.25238	0.202616	6.18102	12	4.71972e-05	0.00092855	NA	0.474537	0.474537	Significant	Up	Statistical
P91657	Stress_vs_OE	0.652027	0.225938	2.88587	12	0.0136807	0.0385393	NA	0.166667	0.166667	Significant	Up	Statistical
Q02427	Stress_vs_OE	0.884882	0.0555924	15.9173	12	1.96774e-09	4.60046e-07	NA	0.047619	0.047619	Significant	Up	Statistical
Q02427	Control_vs_OE	0.833377	0.0555924	14.9908	12	3.9137e-09	1.5147e-06	NA	0.178571	0.178571	Significant	Up	Statistical
Q02926	Stress_vs_OE	0.657881	0.223397	2.94489	12	0.0122601	0.0352075	NA	0.0833333	0.0833333	Significant	Up	Statistical
Q03427	Stress_vs_OE	0.910806	0.0544687	16.7217	12	1.1152e-09	3.65548e-07	NA	0.0933333	0.0933333	Significant	Up	Statistical
Q03427	Control_vs_OE	0.715009	0.0544687	13.127	12	1.76799e-08	3.68385e-06	NA	0.195	0.195	Significant	Up	Statistical
Q05733	Stress_vs_OE	0.97868	0.095323	10.267	12	2.69208e-07	1.49774e-05	NA	0.25	0.25	Significant	Up	Statistical
Q05733	Control_vs_OE	0.611158	0.095323	6.41144	12	3.34539e-05	0.000711673	NA	0.316667	0.316667	Significant	Up	Statistical
Q05783	Control_vs_OE	0.799843	0.21217	3.76982	12	0.00267267	0.0178854	NA	0.458333	0.458333	Significant	Up	Statistical
Q07171	Control_vs_Stress	0.742019	0.0849542	8.73434	12	1.51329e-06	0.000150934	NA	0.166667	0.166667	Significant	Up	Statistical
Q08605	Stress_vs_OE	0.890839	0.181828	4.89935	11	0.000472105	0.0030343	NA	0.125	0.125	Significant	Up	Statistical
Q08605	Control_vs_OE	0.873496	0.181828	4.80397	11	0.000549829	0.00562592	NA	0.25	0.166667	Significant	Up	Statistical
Q09103	Stress_vs_OE	0.9985	0.027077	36.8763	12	1.01474e-13	1.55222e-10	NA	0.0550847	0.0550847	Significant	Up	Statistical
Q09103	Control_vs_OE	0.83224	0.027077	30.736	12	8.83293e-13	4.04902e-09	NA	0.134181	0.134181	Significant	Up	Statistical
Q0E8G6;Q9VSY2	Stress_vs_OE	1.20268	0.0921789	13.0473	12	1.89361e-08	2.17244e-06	NA	0.0833333	0.0833333	Significant	Up	Statistical
Q0E8G6;Q9VSY2	Control_vs_OE	0.985892	0.0921789	10.6954	12	1.724e-07	1.64642e-05	NA	0.333333	0.333333	Significant	Up	Statistical
Q0KHQ6;Q9VWH7;X2JED9	Stress_vs_OE	0.678985	0.166658	4.07411	12	0.0015422	0.00744963	NA	0.0833333	0.0833333	Significant	Up	Statistical
Q0KHU0;Q9VZ45	Control_vs_OE	0.657175	0.0952154	6.90198	12	1.64642e-05	0.000433741	NA	0.451389	0.451389	Significant	Up	Statistical
Q0KI67;Q8INC3;Q9VEZ0	Stress_vs_OE	0.666452	0.084719	7.86661	12	4.46428e-06	0.000104523	NA	0.196429	0.196429	Significant	Up	Statistical
Q24154	Stress_vs_OE	-0.658394	0.141658	-4.64776	12	0.000562612	0.00348895	NA	0.0833333	0.0833333	Significant	Down	Statistical
Q24154	Control_vs_OE	-0.808192	0.141658	-5.70522	12	9.83188e-05	0.0015382	NA	0	0	Significant	Down	Statistical
Q24312	Stress_vs_OE	1.30974	0.0782136	16.7456	11	3.55857e-09	5.83225e-07	NA	0.104167	0.104167	Significant	Up	Statistical
Q24312	Control_vs_OE	1.05846	0.0782136	13.5329	11	3.35034e-08	5.68814e-06	NA	0.395833	0.3125	Significant	Up	Statistical
Q24325	Stress_vs_OE	1.14591	0.137166	8.3542	10	8.04081e-06	0.000153109	NA	0	0	Significant	Up	Statistical
Q24325	Control_vs_OE	1.10333	0.137166	8.04377	10	1.12251e-05	0.000334167	NA	0.166667	0	Significant	Up	Statistical
Q24400	Stress_vs_OE	0.947366	0.147836	6.40821	12	3.36142e-05	0.000438226	NA	0.0444444	0.0444444	Significant	Up	Statistical
Q24400	Control_vs_OE	1.16122	0.147836	7.85475	12	4.53345e-06	0.000182696	NA	0.172222	0.172222	Significant	Up	Statistical
Q24478	Stress_vs_OE	0.683539	0.0614389	11.1255	12	1.11833e-07	8.14604e-06	NA	0.0595238	0.0595238	Significant	Up	Statistical
Q24478	Control_vs_OE	0.658941	0.0614389	10.7251	12	1.67243e-07	1.64642e-05	NA	0.166667	0.166667	Significant	Up	Statistical
Q27237	Stress_vs_OE	0.608999	0.0621646	9.79655	12	4.4699e-07	2.1367e-05	NA	0.229167	0.229167	Significant	Up	Statistical
Q27237	Control_vs_OE	0.588152	0.0621646	9.46121	12	6.49341e-07	4.46931e-05	NA	0.326389	0.326389	Significant	Up	Statistical
Q27272	Stress_vs_OE	0.814398	0.119908	6.79186	12	1.92515e-05	0.000295092	NA	0.194444	0.194444	Significant	Up	Statistical
Q27272	Control_vs_OE	0.991688	0.119908	8.27041	12	2.67099e-06	0.000128882	NA	0.527778	0.277778	Significant	Up	Statistical
Q27333	Control_vs_OE	0.809002	0.228961	3.53335	10	0.00541643	0.0291761	NA	0.25	0	Significant	Up	Statistical
Q27593	Stress_vs_OE	-0.869464	0.231393	-3.75752	12	0.00273322	0.011465	NA	0.633333	0.633333	Significant	Down	Statistical
Q27593	Control_vs_OE	-1.20547	0.231393	-5.20962	12	0.000218415	0.00281241	NA	0.433333	0.433333	Significant	Down	Statistical
Q4Z8K6	Stress_vs_OE	0.660829	0.0695409	9.50274	12	6.19645e-07	2.65723e-05	NA	0.25641	0.25641	Significant	Up	Statistical
Q59DP9	Control_vs_Stress	-0.587997	0.174624	-3.36723	12	0.00559887	0.0357268	NA	0.366667	0.366667	Significant	Down	Statistical
Q59E07	Control_vs_Stress	-0.856269	0.198728	-4.30875	10	0.00154009	0.0160503	NA	0.5	0.333333	Significant	Down	Statistical
Q6IDD9	Control_vs_Stress	-Inf	NA	NA	NA	NA	0	oneCo	0.666667	0	Significant	Down	Statistical
Q6IDD9	Control_vs_OE	-Inf	NA	NA	NA	NA	0	oneCo	0.5	0	Significant	Down	Statistical
Q6IHY5	Stress_vs_OE	-0.83813	0.0824681	-10.1631	12	3.00616e-07	1.56764e-05	NA	0.0625	0.0625	Significant	Down	Statistical
Q6IHY5	Control_vs_OE	-1.14077	0.0824681	-13.8329	12	9.77768e-09	2.8013e-06	NA	0.0208333	0.0208333	Significant	Down	Statistical
Q6NMY2	Control_vs_OE	-1.31624	0.358485	-3.67166	12	0.00319724	0.0201598	NA	0.153846	0.153846	Significant	Down	Statistical
Q7JNE1	Stress_vs_OE	1.03648	0.20806	4.98163	9	0.000757747	0.00435603	NA	0.3125	0.3125	Significant	Up	Statistical
Q7JNE1	Control_vs_OE	1.01875	0.20806	4.89642	9	0.000851844	0.00768672	NA	0.604167	0.270833	Significant	Up	Statistical
Q7JRA7	Stress_vs_OE	0.777399	0.189733	4.09734	12	0.00147939	0.0072069	NA	0.107143	0.107143	Significant	Up	Statistical
Q7JRA7	Control_vs_Stress	-0.611957	0.189733	-3.22536	12	0.00728168	0.0432574	NA	0.27381	0.27381	Significant	Down	Statistical
Q7JRN6	Stress_vs_OE	0.759863	0.13496	5.63028	13	8.19662e-05	0.000856818	NA	0	0	Significant	Up	Statistical
Q7JRN6	Control_vs_OE	1.0506	0.13496	7.78456	13	3.01127e-06	0.000141838	NA	0.25	0.0833333	Significant	Up	Statistical
Q7JUS1	Control_vs_Stress	-0.790105	0.153073	-5.16162	12	0.000236401	0.00464419	NA	0.569444	0.569444	Significant	Down	Statistical
Q7JV39	Control_vs_OE	0.655413	0.181694	3.60724	12	0.0035978	0.0218152	NA	0.125	0.125	Significant	Up	Statistical
Q7JVX3;Q9VCM8	Control_vs_OE	0.713261	0.222353	3.20778	12	0.00752313	0.0365705	NA	0.289683	0.289683	Significant	Up	Statistical
Q7JX87	Stress_vs_OE	0.761419	0.0698537	10.9002	12	1.40047e-07	9.31414e-06	NA	0.0766667	0.0766667	Significant	Up	Statistical
Q7JXB5	Stress_vs_OE	0.674886	0.0598307	11.2799	12	9.60644e-08	7.22688e-06	NA	0.0980392	0.0980392	Significant	Up	Statistical
Q7JXV9	Stress_vs_OE	0.629556	0.0925457	6.80265	12	1.89574e-05	0.000292709	NA	0	0	Significant	Up	Statistical
Q7JYZ0	Control_vs_OE	-0.597318	0.112711	-5.29958	12	0.000188472	0.00249699	NA	0.166667	0.166667	Significant	Down	Statistical
Q7JZB1	Stress_vs_OE	1.00322	0.156704	6.402	12	3.39239e-05	0.000438526	NA	0.114583	0.114583	Significant	Up	Statistical
Q7JZB1	Control_vs_OE	0.595068	0.156704	3.79741	12	0.00254174	0.0171848	NA	0.177083	0.177083	Significant	Up	Statistical
Q7K0D8	Stress_vs_OE	0.808938	0.16046	5.04138	11	0.000377145	0.00255645	NA	0.183333	0.183333	Significant	Up	Statistical
Q7K0D8	Control_vs_OE	0.812579	0.16046	5.06407	11	0.00036395	0.00412957	NA	0.466667	0.383333	Significant	Up	Statistical
Q7K0W4	Stress_vs_OE	0.845284	0.128067	6.6003	12	2.53664e-05	0.000363251	NA	0.192308	0.192308	Significant	Up	Statistical
Q7K0W4	Control_vs_OE	0.644146	0.128067	5.02974	12	0.000294303	0.00351324	NA	0.314103	0.314103	Significant	Up	Statistical
Q7K0Y1	Stress_vs_OE	0.892388	0.168078	5.30937	11	0.00024881	0.00190299	NA	0.25	0.25	Significant	Up	Statistical
Q7K0Y1	Control_vs_OE	0.582061	0.168078	3.46304	11	0.00530465	0.0287429	NA	0.416667	0.333333	Significant	Up	Statistical
Q7K180	Stress_vs_OE	0.664154	0.0771838	8.60484	12	1.76932e-06	5.75844e-05	NA	0	0	Significant	Up	Statistical
Q7K188	Control_vs_Stress	-0.633233	0.12477	-5.0752	12	0.000272821	0.00506762	NA	0.0227273	0.0227273	Significant	Down	Statistical
Q7K2X8	Stress_vs_OE	0.630267	0.127372	4.94825	12	0.000337371	0.00234835	NA	0.27381	0.27381	Significant	Up	Statistical
Q7K4H4	Stress_vs_OE	0.633488	0.0660771	9.5871	12	5.63724e-07	2.56132e-05	NA	0.202381	0.202381	Significant	Up	Statistical
Q7K4Y0	Stress_vs_OE	1.45487	0.251295	5.7895	12	8.61353e-05	0.000880345	NA	0.197917	0.197917	Significant	Up	Statistical
Q7K4Y0	Control_vs_Stress	-1.40674	0.251295	-5.59798	12	0.000116512	0.0029052	NA	0.385417	0.385417	Significant	Down	Statistical
Q7K533	Control_vs_OE	0.718292	0.0749336	9.58571	12	5.64603e-07	4.10816e-05	NA	0.0833333	0.0833333	Significant	Up	Statistical
Q7K549	Control_vs_OE	0.620072	0.12859	4.8221	12	0.000417546	0.00461115	NA	0.369048	0.369048	Significant	Up	Statistical
Q7K5M0	Control_vs_Stress	-0.720416	0.0741345	-9.71769	12	4.87572e-07	6.04589e-05	NA	0.530303	0.530303	Significant	Down	Statistical
Q7KK51;Q8MLR7;Q9W1Q6	Stress_vs_OE	0.604085	0.0827905	7.29656	12	9.52132e-06	0.000176896	NA	0.21875	0.21875	Significant	Up	Statistical
Q7KMJ6	Stress_vs_OE	1.05435	0.112341	9.38522	12	7.07697e-07	2.93579e-05	NA	0.0944444	0.0944444	Significant	Up	Statistical
Q7KMJ6	Control_vs_OE	0.982798	0.112341	8.74832	12	1.48813e-06	8.42169e-05	NA	0.338889	0.338889	Significant	Up	Statistical
Q7KND8	Stress_vs_OE	0.749584	0.0845004	8.87078	11	2.41422e-06	7.33699e-05	NA	0.319444	0.319444	Significant	Up	Statistical
Q7KRI2	Stress_vs_OE	0.671068	0.0762416	8.80185	12	1.39583e-06	4.71107e-05	NA	0.145833	0.145833	Significant	Up	Statistical
Q7KRI2	Control_vs_OE	0.636042	0.0762416	8.34245	12	2.44173e-06	0.000121662	NA	0.197917	0.197917	Significant	Up	Statistical
Q7KSC4	Control_vs_Stress	-0.764705	0.190135	-4.02191	12	0.00169363	0.0171615	NA	0	0	Significant	Down	Statistical
Q7KTA1	Control_vs_Stress	0.631322	0.196903	3.20625	12	0.00754452	0.0442638	NA	0.0625	0.0625	Significant	Up	Statistical
Q7KTG5;Q7KTG6	Stress_vs_OE	-Inf	NA	NA	NA	NA	0	oneCo	0.916667	0	Significant	Down	Statistical
Q7KTG5;Q7KTG6	Control_vs_Stress	Inf	NA	NA	NA	NA	0	oneCo	0.666667	0	Significant	Up	Statistical
Q7KTI0	Stress_vs_OE	0.931041	0.128126	7.26662	12	9.91847e-06	0.000182795	NA	0.25	0.25	Significant	Up	Statistical
Q7KTI0	Control_vs_Stress	-0.815573	0.128126	-6.36541	12	3.58142e-05	0.0012082	NA	0.5	0.5	Significant	Down	Statistical
Q7KTW9	Stress_vs_OE	0.695347	0.195897	3.54956	12	0.00399988	0.0151823	NA	0.171875	0.171875	Significant	Up	Statistical
Q7KTW9	Control_vs_Stress	-0.700203	0.195897	-3.57435	12	0.00382173	0.0279206	NA	0.302083	0.302083	Significant	Down	Statistical
Q7KUD5	Stress_vs_OE	0.856967	0.213918	4.00605	12	0.00174263	0.00810227	NA	0	0	Significant	Up	Statistical
Q7KUD5	Control_vs_OE	0.937046	0.213918	4.38039	12	0.000895686	0.00800355	NA	0.194444	0.194444	Significant	Up	Statistical
Q7KUX7;X2JC79	Control_vs_OE	0.588997	0.0794228	7.41597	12	8.09814e-06	0.000263163	NA	0.229167	0.229167	Significant	Up	Statistical
Q7KVQ8;Q9W2T2	Stress_vs_OE	0.694847	0.0330576	21.0193	12	7.80074e-11	4.4747e-08	NA	0.229167	0.229167	Significant	Up	Statistical
Q867Z4	Stress_vs_OE	1.28693	0.0780587	16.4867	12	1.31292e-09	4.01665e-07	NA	0.125	0.125	Significant	Up	Statistical
Q867Z4	Control_vs_OE	1.16004	0.0780587	14.8611	12	4.32247e-09	1.52417e-06	NA	0.354167	0.354167	Significant	Up	Statistical
Q86B87	Stress_vs_OE	1.04459	0.187918	5.55874	11	0.00017051	0.00146805	NA	0.208333	0.208333	Significant	Up	Statistical
Q86B87	Control_vs_OE	0.72638	0.187918	3.86541	11	0.00262864	0.0176423	NA	0.25	0.166667	Significant	Up	Statistical
Q86BS2;Q960F7	Stress_vs_OE	0.633938	0.194975	3.25138	8	0.0116769	0.0338505	NA	0.0833333	0	Significant	Up	Statistical
Q86BS3	Stress_vs_OE	0.984903	0.120929	8.14447	12	3.12893e-06	8.49626e-05	NA	0.186275	0.186275	Significant	Up	Statistical
Q86BS3	Control_vs_OE	0.801506	0.120929	6.62789	12	2.43711e-05	0.000572909	NA	0.352941	0.352941	Significant	Up	Statistical
Q8IMC6	Stress_vs_OE	0.629794	0.107006	5.88557	12	7.41677e-05	0.000798957	NA	0.212963	0.212963	Significant	Up	Statistical
Q8IN43	Stress_vs_OE	2.52131	0.295768	8.52462	12	1.95091e-06	6.21716e-05	NA	0.224359	0.224359	Significant	Up	Statistical
Q8IN43	Control_vs_Stress	-1.93246	0.295768	-6.53368	12	2.79523e-05	0.00101782	NA	0.487179	0.487179	Significant	Down	Statistical
Q8IN44	Stress_vs_OE	2.27023	0.19939	11.3859	12	8.66353e-08	6.73846e-06	NA	0.145833	0.145833	Significant	Up	Statistical
Q8IN44	Control_vs_Stress	-1.4424	0.19939	-7.23408	12	1.03702e-05	0.000522335	NA	0.380208	0.380208	Significant	Down	Statistical
Q8IN44	Control_vs_OE	0.827831	0.19939	4.15183	12	0.00134221	0.0107703	NA	0.234375	0.234375	Significant	Up	Statistical
Q8IN51	Control_vs_OE	-0.646169	0.0851546	-7.58819	12	6.43139e-06	0.000225826	NA	0.166667	0.166667	Significant	Down	Statistical
Q8ING0	Control_vs_OE	0.640863	0.0955762	6.70525	12	2.17955e-05	0.000531438	NA	0.345238	0.345238	Significant	Up	Statistical
Q8INI8;Q9BIR7;Q9BIS2;Q9VG58	Stress_vs_OE	Inf	NA	NA	NA	NA	0	oneCo	NA	NA	Significant	Up	Statistical
Q8INI8;Q9BIR7;Q9BIS2;Q9VG58	Control_vs_Stress	-Inf	NA	NA	NA	NA	0	oneCo	NA	NA	Significant	Down	Statistical
Q8INK9	Stress_vs_OE	0.750617	0.232312	3.23108	12	0.00720486	0.0237693	NA	0.0416667	0.0416667	Significant	Up	Statistical
Q8INK9	Control_vs_OE	0.877623	0.232312	3.77779	12	0.00263418	0.0176536	NA	0.166667	0.166667	Significant	Up	Statistical
Q8INQ9;Q8INR0;Q9XYA7	Stress_vs_OE	0.653234	0.145846	4.47893	12	0.000753823	0.00435206	NA	0.0833333	0.0833333	Significant	Up	Statistical
Q8INQ9;Q8INR0;Q9XYA7	Control_vs_OE	0.62549	0.145846	4.2887	12	0.00105269	0.00900287	NA	0.216667	0.216667	Significant	Up	Statistical
Q8INU6	Stress_vs_OE	Inf	NA	NA	NA	NA	0	oneCo	0.472222	0.388889	Significant	Up	Statistical
Q8INU6	Control_vs_OE	Inf	NA	NA	NA	NA	0	oneCo	0.666667	0.166667	Significant	Up	Statistical
Q8IPB7	Control_vs_OE	0.658807	0.193695	3.40126	12	0.00525749	0.0285549	NA	0.270833	0.270833	Significant	Up	Statistical
Q8IPG8	Stress_vs_OE	-1.11834	0.269125	-4.15545	12	0.00133356	0.00662278	NA	0.433333	0.433333	Significant	Down	Statistical
Q8IPG8	Control_vs_Stress	1.31505	0.269125	4.88641	12	0.000374442	0.00650735	NA	0.183333	0.183333	Significant	Up	Statistical
Q8IPH6;Q8IPH7	Stress_vs_OE	-0.991283	0.184398	-5.37578	9	0.000446963	0.00290517	NA	0.5	0.416667	Significant	Down	Statistical
Q8IPH6;Q8IPH7	Control_vs_Stress	0.631766	0.172981	3.65224	9	0.00529907	0.0344365	NA	0.541667	0.291667	Significant	Up	Statistical
Q8IQ80;Q8IQ82	Control_vs_Stress	-0.65047	0.168523	-3.85984	12	0.00226931	0.0203352	NA	0.307292	0.307292	Significant	Down	Statistical
Q8IQQ3	Stress_vs_OE	0.590111	0.152353	3.87332	12	0.00221454	0.00975289	NA	0.236111	0.236111	Significant	Up	Statistical
Q8IQQ3	Control_vs_OE	0.844483	0.152353	5.54293	12	0.000127202	0.00186889	NA	0.402778	0.402778	Significant	Up	Statistical
Q8IQS5	Stress_vs_OE	0.810419	0.1491	5.43542	11	0.000205321	0.00165012	NA	0.0833333	0.0833333	Significant	Up	Statistical
Q8IQU1	Control_vs_Stress	0.850452	0.062798	13.5427	12	1.24324e-08	5.72494e-06	NA	0.0416667	0.0416667	Significant	Up	Statistical
Q8IQV9	Stress_vs_OE	0.863187	0.15191	5.68221	12	0.000101953	0.000997573	NA	0.37037	0.37037	Significant	Up	Statistical
Q8IR72	Control_vs_Stress	0.990157	0.317933	3.11435	12	0.00894819	0.0492849	NA	0.166667	0.166667	Significant	Up	Statistical
Q8IR95	Control_vs_OE	0.807972	0.227554	3.55068	12	0.00399168	0.0234634	NA	0.116667	0.116667	Significant	Up	Statistical
Q8IRD6	Stress_vs_OE	1.01191	0.371726	2.72219	12	0.0185326	0.0485145	NA	0.0277778	0.0277778	Significant	Up	Statistical
Q8IRI5	Stress_vs_OE	0.717551	0.198051	3.62305	12	0.00349494	0.013838	NA	0.416667	0.416667	Significant	Up	Statistical
Q8MKW7	Stress_vs_OE	0.644658	0.229415	2.81001	12	0.0157491	0.0427902	NA	0.125	0.125	Significant	Up	Statistical
Q8MM39;Q8MM49	Stress_vs_OE	0.636959	0.109919	5.79478	12	8.54269e-05	0.000878978	NA	0	0	Significant	Up	Statistical
Q8MRT7	Stress_vs_OE	0.703332	0.063769	11.0294	12	1.23041e-07	8.55511e-06	NA	0.0277778	0.0277778	Significant	Up	Statistical
Q8MSB1	Stress_vs_OE	0.83353	0.155161	5.37202	12	0.000167509	0.00145038	NA	0.458333	0.291667	Significant	Up	Statistical
Q8MSI2	Stress_vs_OE	2.53995	0.375714	6.76034	12	2.01388e-05	0.000303006	NA	0.311728	0.311728	Significant	Up	Statistical
Q8MSI2	Control_vs_Stress	-2.48255	0.375714	-6.60756	12	2.51006e-05	0.000956935	NA	0.580247	0.580247	Significant	Down	Statistical
Q8MSS1	Stress_vs_OE	0.732021	0.0954755	7.6671	12	5.79379e-06	0.000122524	NA	0.242857	0.242857	Significant	Up	Statistical
Q8MSS1	Control_vs_OE	0.620933	0.0954755	6.50358	12	2.92113e-05	0.000662895	NA	0.390476	0.390476	Significant	Up	Statistical
Q8MSW9	Control_vs_OE	0.608981	0.136193	4.47146	12	0.00076371	0.00713003	NA	0.333333	0.333333	Significant	Up	Statistical
Q8MYW9	Stress_vs_OE	0.658604	0.0886547	7.42886	12	7.95866e-06	0.00015273	NA	0.0208333	0.0208333	Significant	Up	Statistical
Q8SWS3	Stress_vs_OE	-Inf	NA	NA	NA	NA	0	oneCo	0.833333	0	Significant	Down	Statistical
Q8SWS3	Control_vs_Stress	Inf	NA	NA	NA	NA	0	oneCo	0.666667	0	Significant	Up	Statistical
Q8SXX2	Control_vs_Stress	-0.608335	0.173838	-3.49944	12	0.00438642	0.0301723	NA	0.291667	0.291667	Significant	Down	Statistical
Q8SXX2	Control_vs_OE	-0.583767	0.173838	-3.35811	12	0.00569404	0.0302101	NA	0.166667	0.166667	Significant	Down	Statistical
Q8SYJ2	Control_vs_OE	-0.720785	0.0924858	-7.79347	12	4.90933e-06	0.000190715	NA	0.0416667	0.0416667	Significant	Down	Statistical
Q8SZP2	Control_vs_Stress	-Inf	NA	NA	NA	NA	0	oneCo	0.958333	0.0416667	Significant	Down	Statistical
Q8SZP2	Control_vs_OE	-Inf	NA	NA	NA	NA	0	oneCo	0.625	0.125	Significant	Down	Statistical
Q8T0N5	Stress_vs_OE	0.743639	0.245522	3.0288	12	0.0104899	0.0313809	NA	0.189394	0.189394	Significant	Up	Statistical
Q8T3L6	Stress_vs_OE	0.742004	0.0872856	8.50088	12	2.00841e-06	6.26978e-05	NA	0.154762	0.154762	Significant	Up	Statistical
Q8T8R1	Control_vs_Stress	0.595162	0.112439	5.29321	12	0.000190441	0.00412144	NA	0	0	Significant	Up	Statistical
Q94513	Stress_vs_OE	Inf	NA	NA	NA	NA	0	oneCo	0.333333	0.166667	Significant	Up	Statistical
Q94513	Control_vs_OE	Inf	NA	NA	NA	NA	0	oneCo	0.666667	0.0833333	Significant	Up	Statistical
Q94883	Stress_vs_OE	1.21437	0.0652693	18.6056	12	3.23753e-10	1.4857e-07	NA	0.194444	0.194444	Significant	Up	Statistical
Q94883	Control_vs_OE	0.859683	0.0652693	13.1713	12	1.70202e-08	3.68385e-06	NA	0.43254	0.43254	Significant	Up	Statistical
Q94915	Stress_vs_OE	0.877161	0.194176	4.51736	12	0.000705034	0.00414267	NA	0.12963	0.12963	Significant	Up	Statistical
Q94915	Control_vs_OE	0.851252	0.194176	4.38393	12	0.000890145	0.00796958	NA	0.277778	0.277778	Significant	Up	Statistical
Q95U34	Stress_vs_OE	0.953308	0.240235	3.96823	12	0.00186543	0.00856905	NA	0.113095	0.113095	Significant	Up	Statistical
Q961D1	Stress_vs_OE	0.656417	0.0977116	6.71791	11	3.29598e-05	0.000432677	NA	0.25	0	Significant	Up	Statistical
Q967S0;Q9VRZ1	Stress_vs_OE	0.739812	0.258829	2.85831	12	0.014399	0.0400466	NA	0.0436508	0.0436508	Significant	Up	Statistical
Q9GQN5	Stress_vs_OE	0.63154	0.150238	4.20359	12	0.00122407	0.00623446	NA	0.369048	0.369048	Significant	Up	Statistical
Q9I7D3	Stress_vs_OE	-0.875196	0.173931	-5.03186	12	0.000293264	0.00212605	NA	0.479167	0.479167	Significant	Down	Statistical
Q9I7D3	Control_vs_OE	-0.702802	0.173931	-4.0407	12	0.00163745	0.0123455	NA	0.364583	0.364583	Significant	Down	Statistical
Q9I7J0	Stress_vs_OE	-0.749802	0.0720547	-10.406	12	2.32579e-07	1.38611e-05	NA	0.138889	0.138889	Significant	Down	Statistical
Q9I7J0	Control_vs_Stress	0.69697	0.0720547	9.67279	12	5.12427e-07	6.18688e-05	NA	0.0674603	0.0674603	Significant	Up	Statistical
Q9I7S8	Stress_vs_OE	0.711689	0.165744	4.29391	12	0.00104304	0.00557221	NA	0.0866013	0.0866013	Significant	Up	Statistical
Q9I7S8	Control_vs_Stress	-0.597006	0.165744	-3.60199	12	0.00363265	0.0273671	NA	0.147059	0.147059	Significant	Down	Statistical
Q9NBW1	Stress_vs_OE	-0.785773	0.0837513	-9.38221	12	7.10118e-07	2.93579e-05	NA	0	0	Significant	Down	Statistical
Q9NDJ2	Control_vs_Stress	-Inf	NA	NA	NA	NA	0	oneCo	0.791667	0.125	Significant	Down	Statistical
Q9NDJ2	Control_vs_OE	-Inf	NA	NA	NA	NA	0	oneCo	0.666667	0.166667	Significant	Down	Statistical
Q9V359	Control_vs_Stress	0.622485	0.142433	4.37038	12	0.000911583	0.0111693	NA	0.125	0.125	Significant	Up	Statistical
Q9V3H9	Stress_vs_OE	0.742951	0.260526	2.85174	10	0.0171988	0.0455953	NA	0.0833333	0.0833333	Significant	Up	Statistical
Q9V3T8	Stress_vs_OE	0.633944	0.114499	5.53666	12	0.000128485	0.00118431	NA	0.0520833	0.0520833	Significant	Up	Statistical
Q9V3T8	Control_vs_OE	0.782901	0.114499	6.8376	12	1.80372e-05	0.000456809	NA	0.15625	0.15625	Significant	Up	Statistical
Q9V3V0	Stress_vs_OE	1.11087	0.107491	10.3346	12	2.50685e-07	1.42024e-05	NA	0.309524	0.309524	Significant	Up	Statistical
Q9V3V0	Control_vs_OE	0.924524	0.107491	8.60093	12	1.77773e-06	9.54126e-05	NA	0.464286	0.464286	Significant	Up	Statistical
Q9V3W7	Stress_vs_OE	1.06983	0.105403	10.1499	12	3.04885e-07	1.57146e-05	NA	0.00641026	0.00641026	Significant	Up	Statistical
Q9V3W7	Control_vs_OE	1.14907	0.105403	10.9017	12	1.39842e-07	1.4569e-05	NA	0.115385	0.115385	Significant	Up	Statistical
Q9V3Y7	Stress_vs_OE	0.649114	0.111281	5.83311	12	8.04669e-05	0.000844995	NA	0.0902778	0.0902778	Significant	Up	Statistical
Q9V3Y7	Control_vs_OE	0.787191	0.111281	7.07391	12	1.29376e-05	0.000365173	NA	0.229167	0.229167	Significant	Up	Statistical
Q9V460	Stress_vs_OE	0.661555	0.0446319	14.8225	12	4.45297e-09	7.04645e-07	NA	0.115741	0.115741	Significant	Up	Statistical
Q9V463	Stress_vs_OE	0.746169	0.129038	5.78257	12	8.70746e-05	0.000885635	NA	0.395833	0.395833	Significant	Up	Statistical
Q9V466	Stress_vs_OE	1.05053	0.233596	4.49719	12	0.000730214	0.00426873	NA	0.131944	0.131944	Significant	Up	Statistical
Q9V466	Control_vs_OE	0.892593	0.233596	3.82109	12	0.00243465	0.0166078	NA	0.305556	0.305556	Significant	Up	Statistical
Q9V4C0	Stress_vs_OE	0.676889	0.208866	3.24078	12	0.00707642	0.0234806	NA	0.3125	0.3125	Significant	Up	Statistical
Q9V4C1	Control_vs_OE	0.899518	0.140889	6.38459	12	3.48096e-05	0.000735332	NA	0.320175	0.320175	Significant	Up	Statistical
Q9V4T5	Stress_vs_OE	0.771101	0.226115	3.41022	12	0.00517116	0.018583	NA	0.111111	0.111111	Significant	Up	Statistical
Q9V4T5	Control_vs_OE	1.15477	0.226115	5.10703	12	0.000258767	0.0032146	NA	0.277778	0.277778	Significant	Up	Statistical
Q9V674	Control_vs_OE	0.8232	0.263662	3.12218	12	0.00881906	0.0413359	NA	0.231481	0.231481	Significant	Up	Statistical
Q9V6H1	Stress_vs_OE	0.679003	0.162725	4.1727	13	0.00109386	0.00578308	NA	0.333333	0.333333	Significant	Up	Statistical
Q9V770	Stress_vs_OE	-Inf	NA	NA	NA	NA	0	oneCo	NA	NA	Significant	Down	Statistical
Q9V770	Control_vs_OE	-Inf	NA	NA	NA	NA	0	oneCo	NA	NA	Significant	Down	Statistical
Q9V771	Stress_vs_OE	0.589858	0.114318	5.15978	12	0.000237119	0.00185223	NA	0.2625	0.2625	Significant	Up	Statistical
Q9V7U0	Stress_vs_OE	3.23126	0.234112	13.8022	2	0.00520837	0.0186728	NA	0.75	0	Significant	Up	Statistical
Q9V7U0	Control_vs_Stress	-Inf	NA	NA	NA	NA	0	oneCo	0.916667	0	Significant	Down	Statistical
Q9V7U0	Control_vs_OE	-Inf	NA	NA	NA	NA	0	oneCo	0.666667	0	Significant	Down	Statistical
Q9V8I2	Stress_vs_OE	0.588577	0.10152	5.79762	12	8.50484e-05	0.000878537	NA	0.0555556	0.0555556	Significant	Up	Statistical
Q9V9L1	Stress_vs_OE	0.623637	0.135647	4.59751	12	0.000613564	0.00371948	NA	0.1	0.1	Significant	Up	Statistical
Q9V9S7	Control_vs_OE	0.98866	0.125375	7.88562	12	4.35585e-06	0.000182696	NA	0.643519	0.643519	Significant	Up	Statistical
Q9V9U0	Control_vs_Stress	-2.26326	0.625421	-3.61878	12	0.00352241	0.0268452	NA	0.416667	0.416667	Significant	Down	Statistical
Q9V9W4	Stress_vs_OE	0.754033	0.147931	5.0972	12	0.000263022	0.00196581	NA	0.203704	0.203704	Significant	Up	Statistical
Q9V9W4	Control_vs_Stress	-0.704717	0.147931	-4.76383	12	0.0004611	0.00737118	NA	0.37037	0.37037	Significant	Down	Statistical
Q9VA02	Stress_vs_OE	0.661309	0.202398	3.26737	12	0.00673599	0.022679	NA	0.22	0.22	Significant	Up	Statistical
Q9VAA9	Stress_vs_OE	0.883635	0.134796	6.55535	12	2.70817e-05	0.000377745	NA	0.239583	0.239583	Significant	Up	Statistical
Q9VAA9	Control_vs_OE	0.670603	0.134796	4.97495	12	0.000322576	0.00379151	NA	0.40625	0.40625	Significant	Up	Statistical
Q9VAF0	Stress_vs_OE	0.67783	0.162049	4.18286	9	0.00236603	0.0102238	NA	0	0	Significant	Up	Statistical
Q9VAF0	Control_vs_OE	0.700608	0.162049	4.32343	9	0.0019235	0.0140628	NA	0.333333	0	Significant	Up	Statistical
Q9VAI6	Control_vs_OE	0.659323	0.142065	4.64099	12	0.000569211	0.00573464	NA	0.12963	0.12963	Significant	Up	Statistical
Q9VAI9	Control_vs_OE	0.727389	0.20788	3.49909	12	0.00438922	0.0250625	NA	0.0333333	0.0333333	Significant	Up	Statistical
Q9VAU5	Stress_vs_OE	0.756758	0.146362	5.17047	9	0.000586798	0.00360296	NA	0.25	0	Significant	Up	Statistical
Q9VAW1	Control_vs_OE	0.581528	0.0964414	6.02986	11	8.55196e-05	0.00140008	NA	0.458333	0.375	Significant	Up	Statistical
Q9VB86	Control_vs_Stress	-2.58599	0.491492	-5.26151	11	0.000267794	0.00504209	NA	0.416667	0.333333	Significant	Down	Statistical
Q9VB86	Control_vs_OE	-1.75093	0.491492	-3.56248	11	0.00445342	0.0253281	NA	0.0740741	0.0740741	Significant	Down	Statistical
Q9VBF3	Control_vs_OE	1.16396	0.370893	3.13825	12	0.00855975	0.040348	NA	0.0833333	0.0833333	Significant	Up	Statistical
Q9VBR6	Stress_vs_OE	1.32316	0.212326	6.23174	12	4.37265e-05	0.000529448	NA	0.393939	0.393939	Significant	Up	Statistical
Q9VBR6	Control_vs_Stress	-0.852254	0.212326	-4.01389	12	0.00171824	0.0172272	NA	0.75	0.75	Significant	Down	Statistical
Q9VBS3	Stress_vs_OE	1.25024	0.152136	8.21789	12	2.85259e-06	8.04371e-05	NA	0.144444	0.144444	Significant	Up	Statistical
Q9VBS3	Control_vs_OE	0.839779	0.152136	5.51991	12	0.000131976	0.00191379	NA	0.288889	0.288889	Significant	Up	Statistical
Q9VC49	Stress_vs_OE	0.716955	0.18275	3.92314	12	0.00202359	0.00913371	NA	0.166667	0.166667	Significant	Up	Statistical
Q9VC61	Stress_vs_OE	0.609387	0.10322	5.90375	5	0.00198446	0.00901651	NA	0.5	0	Significant	Up	Statistical
Q9VC61	Control_vs_Stress	-1.00544	0.135147	-7.4396	5	0.000691762	0.00953095	NA	0.75	0	Significant	Down	Statistical
Q9VC87	Control_vs_OE	0.598624	0.0762284	7.85304	12	4.54348e-06	0.000182696	NA	0.166667	0.166667	Significant	Up	Statistical
Q9VCD8	Stress_vs_OE	0.739071	0.136249	5.42443	12	0.000153883	0.00134765	NA	0.351852	0.351852	Significant	Up	Statistical
Q9VCW3	Stress_vs_OE	0.803695	0.157137	5.1146	12	0.000255536	0.0019323	NA	0.236111	0.236111	Significant	Up	Statistical
Q9VCY8	Stress_vs_OE	0.798531	0.220006	3.62959	10	0.00461574	0.0169182	NA	0.166667	0	Significant	Up	Statistical
Q9VCY8	Control_vs_Stress	-0.917338	0.200837	-4.56757	10	0.0010301	0.0121246	NA	0.416667	0	Significant	Down	Statistical
Q9VD48	Stress_vs_OE	1.06687	0.268137	3.97883	11	0.00216313	0.00958166	NA	0.25	0.25	Significant	Up	Statistical
Q9VD48	Control_vs_OE	0.815008	0.268137	3.03952	11	0.0112562	0.0491881	NA	0.333333	0.25	Significant	Up	Statistical
Q9VD66	Stress_vs_OE	1.7451	0.516263	3.38026	9	0.00812357	0.0259423	NA	0.208333	0.208333	Significant	Up	Statistical
Q9VDG1	Control_vs_Stress	0.803079	0.248495	3.23177	12	0.00719565	0.0429865	NA	0.138889	0.138889	Significant	Up	Statistical
Q9VE01	Stress_vs_OE	0.994795	0.133583	7.44704	12	7.76628e-06	0.000151015	NA	0.216667	0.216667	Significant	Up	Statistical
Q9VE01	Control_vs_OE	0.685721	0.133583	5.13331	12	0.000247733	0.00311126	NA	0.333333	0.333333	Significant	Up	Statistical
Q9VE85	Stress_vs_OE	0.602236	0.0914427	6.58594	12	2.59018e-05	0.000369141	NA	0.166667	0.166667	Significant	Up	Statistical
Q9VE85	Control_vs_OE	0.660385	0.0914427	7.22184	12	1.05459e-05	0.000322022	NA	0.375	0.375	Significant	Up	Statistical
Q9VEA2	Stress_vs_OE	0.662209	0.106814	6.19967	12	4.58883e-05	0.00055126	NA	0.3	0.3	Significant	Up	Statistical
Q9VEX9	Control_vs_Stress	0.582429	0.160038	3.63933	11	0.00389266	0.0283035	NA	0.555556	0.222222	Significant	Up	Statistical
Q9VEY4	Stress_vs_OE	0.798622	0.233868	3.41483	12	0.00512726	0.0184541	NA	0.0833333	0.0833333	Significant	Up	Statistical
Q9VEY4	Control_vs_OE	0.717356	0.233868	3.06735	12	0.00976475	0.0445162	NA	0.208333	0.208333	Significant	Up	Statistical
Q9VF53	Control_vs_Stress	-0.624125	0.187733	-3.32454	12	0.00605905	0.0379563	NA	0.313492	0.313492	Significant	Down	Statistical
Q9VF66	Stress_vs_OE	0.97682	0.148446	6.58031	12	2.61148e-05	0.000371025	NA	0.115079	0.115079	Significant	Up	Statistical
Q9VF66	Control_vs_OE	1.06209	0.148446	7.15472	12	1.15668e-05	0.000334167	NA	0.333333	0.333333	Significant	Up	Statistical
Q9VFC8	Stress_vs_OE	0.581354	0.0568184	10.2318	12	2.79432e-07	1.49774e-05	NA	0.166667	0.166667	Significant	Up	Statistical
Q9VFJ0	Stress_vs_OE	0.773345	0.0607937	12.7208	12	2.51813e-08	2.68738e-06	NA	0.15625	0.15625	Significant	Up	Statistical
Q9VFJ0	Control_vs_OE	0.798051	0.0607937	13.1272	12	1.76767e-08	3.68385e-06	NA	0.28125	0.28125	Significant	Up	Statistical
Q9VFL5	Stress_vs_OE	0.693918	0.127253	5.45306	12	0.000146937	0.00130425	NA	0.197917	0.197917	Significant	Up	Statistical
Q9VFR3	Stress_vs_OE	-1.00492	0.18057	-5.56522	12	0.000122754	0.00114263	NA	0.40625	0.40625	Significant	Down	Statistical
Q9VFR3	Control_vs_Stress	0.841622	0.18057	4.66091	12	0.000550026	0.00821267	NA	0.208333	0.208333	Significant	Up	Statistical
Q9VFU1	Stress_vs_OE	-Inf	NA	NA	NA	NA	0	oneCo	NA	NA	Significant	Down	Statistical
Q9VFU1	Control_vs_OE	-Inf	NA	NA	NA	NA	0	oneCo	NA	NA	Significant	Down	Statistical
Q9VG74	Stress_vs_OE	-0.616673	0.113566	-5.43008	12	0.000152485	0.00134052	NA	0.166667	0.166667	Significant	Down	Statistical
Q9VG74	Control_vs_Stress	0.598145	0.113566	5.26694	12	0.000198804	0.00420515	NA	0.0833333	0.0833333	Significant	Up	Statistical
Q9VGA4	Stress_vs_OE	0.793157	0.0897187	8.84049	11	2.49608e-06	7.46844e-05	NA	0.416667	0.416667	Significant	Up	Statistical
Q9VGF1	Stress_vs_OE	1.72042	0.076011	22.6338	12	3.27547e-11	3.00623e-08	NA	0.0909091	0.0909091	Significant	Up	Statistical
Q9VGF1	Control_vs_Stress	-0.616776	0.076011	-8.1143	12	3.25067e-06	0.000233032	NA	0.454545	0.454545	Significant	Down	Statistical
Q9VGF1	Control_vs_OE	1.10364	0.076011	14.5195	12	5.63613e-09	1.84543e-06	NA	0.409091	0.409091	Significant	Up	Statistical
Q9VGT8	Control_vs_OE	-0.869029	0.267313	-3.25098	12	0.0069438	0.0346736	NA	0.219697	0.219697	Significant	Down	Statistical
Q9VHC0	Stress_vs_OE	0.601587	0.17679	3.40284	12	0.00524211	0.0187352	NA	0.25	0.25	Significant	Up	Statistical
Q9VHC0	Control_vs_OE	1.01441	0.17679	5.73796	12	9.33822e-05	0.00147227	NA	0.611111	0.361111	Significant	Up	Statistical
Q9VHF5	Stress_vs_OE	0.70079	0.174053	4.0263	12	0.00168033	0.00788924	NA	0.0277778	0.0277778	Significant	Up	Statistical
Q9VHF5	Control_vs_Stress	-0.816981	0.174053	-4.69386	12	0.000519754	0.00797536	NA	0.0555556	0.0555556	Significant	Down	Statistical
Q9VHH0	Control_vs_Stress	0.590391	0.0962717	6.13255	12	5.07878e-05	0.00155343	NA	0.472222	0.305556	Significant	Up	Statistical
Q9VHM3	Stress_vs_OE	0.746395	0.131033	5.69626	11	0.000138958	0.0012479	NA	0.0833333	0.0833333	Significant	Up	Statistical
Q9VHM3	Control_vs_OE	0.589074	0.131033	4.49563	11	0.000907712	0.00804827	NA	0.333333	0.25	Significant	Up	Statistical
Q9VHP0	Control_vs_Stress	0.939785	0.15251	6.16214	12	4.85629e-05	0.00150545	NA	0.134058	0.134058	Significant	Up	Statistical
Q9VHS2	Stress_vs_OE	-0.58245	0.110585	-5.26699	12	0.000198787	0.00161172	NA	0.208333	0.208333	Significant	Down	Statistical
Q9VHS2	Control_vs_OE	-0.931219	0.110585	-8.42083	12	2.21601e-06	0.000114137	NA	0.125	0.125	Significant	Down	Statistical
Q9VI25	Stress_vs_OE	-0.886587	0.0572342	-15.4905	12	2.68851e-09	5.09716e-07	NA	0.173913	0.173913	Significant	Down	Statistical
Q9VI25	Control_vs_Stress	0.774853	0.0572342	13.5383	12	1.24781e-08	5.72494e-06	NA	0.112319	0.112319	Significant	Up	Statistical
Q9VIQ5	Control_vs_OE	0.813033	0.199546	4.07442	12	0.00154135	0.0118608	NA	0.375	0.375	Significant	Up	Statistical
Q9VIQ8	Control_vs_OE	-0.643716	0.0707118	-9.10337	12	9.78491e-07	5.98053e-05	NA	0.0654762	0.0654762	Significant	Down	Statistical
Q9VIT5	Stress_vs_OE	0.594514	0.189624	3.13522	11	0.00948889	0.0290297	NA	0.25	0.166667	Significant	Up	Statistical
Q9VIV2	Stress_vs_OE	0.728758	0.148616	4.90364	12	0.000363705	0.00248	NA	0.272727	0.272727	Significant	Up	Statistical
Q9VIW6	Stress_vs_OE	0.740424	0.184401	4.01529	11	0.00203239	0.00916171	NA	0	0	Significant	Up	Statistical
Q9VIX7	Control_vs_Stress	0.632843	0.120133	5.26786	12	0.000198502	0.00420515	NA	0.133333	0.133333	Significant	Up	Statistical
Q9VJ12	Control_vs_OE	0.654934	0.065602	9.98344	12	3.64601e-07	2.8816e-05	NA	0.0416667	0.0416667	Significant	Up	Statistical
Q9VJ45	Stress_vs_OE	-0.606807	0.146928	-4.12996	13	0.0011848	0.0061075	NA	0.361111	0.194444	Significant	Down	Statistical
Q9VJ45	Control_vs_OE	-0.93336	0.164271	-5.68184	13	7.51781e-05	0.0012811	NA	0.0833333	0.0833333	Significant	Down	Statistical
Q9VJC7	Stress_vs_OE	0.631068	0.079488	7.93917	12	4.06516e-06	9.76703e-05	NA	0.173611	0.173611	Significant	Up	Statistical
Q9VJC7	Control_vs_OE	0.583359	0.079488	7.33895	12	8.98767e-06	0.000282188	NA	0.256944	0.256944	Significant	Up	Statistical
Q9VK33	Stress_vs_OE	Inf	NA	NA	NA	NA	0	oneCo	0.0833333	0	Significant	Up	Statistical
Q9VK33	Control_vs_OE	Inf	NA	NA	NA	NA	0	oneCo	0.5	0	Significant	Up	Statistical
Q9VK39	Stress_vs_OE	0.731872	0.244491	2.99346	12	0.0112021	0.032722	NA	0.0555556	0.0555556	Significant	Up	Statistical
Q9VK39	Control_vs_OE	0.883455	0.244491	3.61345	12	0.00355702	0.0216252	NA	0.111111	0.111111	Significant	Up	Statistical
Q9VKJ3	Stress_vs_OE	0.821294	0.115884	7.0872	12	1.27007e-05	0.00021829	NA	0.361111	0.361111	Significant	Up	Statistical
Q9VKJ8	Stress_vs_OE	0.734986	0.194711	3.77475	10	0.00363309	0.0141051	NA	0.375	0.291667	Significant	Up	Statistical
Q9VKJ8	Control_vs_Stress	-0.683042	0.194711	-3.50797	10	0.00565074	0.0359578	NA	0.541667	0.375	Significant	Down	Statistical
Q9VKK1	Stress_vs_OE	1.22222	0.119444	10.2326	12	2.79187e-07	1.49774e-05	NA	0.206522	0.206522	Significant	Up	Statistical
Q9VKK1	Control_vs_OE	0.793488	0.119444	6.6432	12	2.3837e-05	0.000565958	NA	0.347826	0.347826	Significant	Up	Statistical
Q9VKQ9	Stress_vs_OE	0.627958	0.117815	5.33004	12	0.000179338	0.00150453	NA	0.0555556	0.0555556	Significant	Up	Statistical
Q9VKR7	Stress_vs_OE	Inf	NA	NA	NA	NA	0	oneCo	NA	NA	Significant	Up	Statistical
Q9VKR7	Control_vs_Stress	-Inf	NA	NA	NA	NA	0	oneCo	NA	NA	Significant	Down	Statistical
Q9VKV6	Stress_vs_OE	1.08413	0.241668	4.48602	11	0.000922203	0.00506825	NA	0.25	0.25	Significant	Up	Statistical
Q9VL67	Stress_vs_OE	0.701655	0.0808637	8.67701	11	2.99289e-06	8.28924e-05	NA	0.125	0.125	Significant	Up	Statistical
Q9VL67	Control_vs_OE	0.634488	0.0808637	7.84638	11	7.85082e-06	0.000259134	NA	0.333333	0.25	Significant	Up	Statistical
Q9VLG9	Stress_vs_OE	0.596995	0.21651	2.75735	12	0.0173641	0.0459803	NA	0.0462963	0.0462963	Significant	Up	Statistical
Q9VLK2	Stress_vs_OE	0.656752	0.157356	4.17368	12	0.00129096	0.00647933	NA	0.25	0.25	Significant	Up	Statistical
Q9VLT7	Stress_vs_OE	0.730179	0.101588	7.18768	12	1.10529e-05	0.000197362	NA	0.166667	0.166667	Significant	Up	Statistical
Q9VM07	Stress_vs_OE	-1.27798	0.323313	-3.95275	12	0.00191824	0.00877648	NA	0.291667	0.291667	Significant	Down	Statistical
Q9VMC8	Stress_vs_OE	0.657457	0.114589	5.73752	11	0.000130751	0.00120003	NA	0.0833333	0	Significant	Up	Statistical
Q9VMC8	Control_vs_OE	0.713523	0.11095	6.43101	11	4.86773e-05	0.000949517	NA	0.333333	0	Significant	Up	Statistical
Q9VMJ7	Stress_vs_OE	0.911709	0.136145	6.69662	12	2.20679e-05	0.000324583	NA	0.236111	0.236111	Significant	Up	Statistical
Q9VMJ7	Control_vs_OE	0.731993	0.136145	5.37658	12	0.000166274	0.00228204	NA	0.416667	0.416667	Significant	Up	Statistical
Q9VMR6	Stress_vs_OE	0.768498	0.0793474	9.68524	12	5.05403e-07	2.3193e-05	NA	0.213768	0.213768	Significant	Up	Statistical
Q9VMR8	Stress_vs_OE	Inf	NA	NA	NA	NA	0	oneCo	0.430556	0.347222	Significant	Up	Statistical
Q9VMR8	Control_vs_Stress	-2.24739	0.250628	-8.96704	7	4.36869e-05	0.00138233	NA	0.916667	0.333333	Significant	Down	Statistical
Q9VMR8	Control_vs_OE	Inf	NA	NA	NA	NA	0	oneCo	0.513889	0.0138889	Significant	Up	Statistical
Q9VMS1	Stress_vs_OE	-0.629909	0.0680837	-9.25199	12	8.24039e-07	3.25993e-05	NA	0.09375	0.09375	Significant	Down	Statistical
Q9VMS1	Control_vs_OE	-0.78694	0.0680837	-11.5584	12	7.33517e-08	1.0347e-05	NA	0.0625	0.0625	Significant	Down	Statistical
Q9VN39	Stress_vs_OE	1.21327	0.0838051	14.4773	12	5.8264e-09	8.62495e-07	NA	0.142857	0.142857	Significant	Up	Statistical
Q9VN39	Control_vs_OE	1.31142	0.0838051	15.6485	12	2.39305e-09	1.30827e-06	NA	0.380952	0.380952	Significant	Up	Statistical
Q9VN91	Stress_vs_OE	0.680278	0.142461	4.77517	12	0.000452263	0.00292727	NA	0.05	0.05	Significant	Up	Statistical
Q9VN91	Control_vs_OE	0.683115	0.142461	4.79509	12	0.000437177	0.00476014	NA	0.116667	0.116667	Significant	Up	Statistical
Q9VP02	Stress_vs_OE	0.762432	0.112318	6.78813	12	1.93541e-05	0.000295092	NA	0.104167	0.104167	Significant	Up	Statistical
Q9VP13	Control_vs_OE	0.592411	0.196841	3.0096	12	0.010871	0.0479774	NA	0.222222	0.222222	Significant	Up	Statistical
Q9VP52	Stress_vs_OE	0.686297	0.119094	5.76266	12	8.98328e-05	0.000904041	NA	0.125	0.125	Significant	Up	Statistical
Q9VP55	Control_vs_Stress	-Inf	NA	NA	NA	NA	0	oneCo	0.833333	0	Significant	Down	Statistical
Q9VP55	Control_vs_OE	-Inf	NA	NA	NA	NA	0	oneCo	0.583333	0	Significant	Down	Statistical
Q9VP57	Stress_vs_OE	1.06728	0.0554082	19.2622	12	2.16221e-10	1.10249e-07	NA	0.106481	0.106481	Significant	Up	Statistical
Q9VP57	Control_vs_OE	0.883748	0.0554082	15.9498	12	1.92221e-09	1.25878e-06	NA	0.319444	0.319444	Significant	Up	Statistical
Q9VP61	Stress_vs_OE	0.684333	0.173827	3.93687	12	0.00197402	0.00897796	NA	0.0614754	0.0614754	Significant	Up	Statistical
Q9VP61	Control_vs_Stress	-0.588921	0.173827	-3.38798	12	0.00538811	0.0349038	NA	0.120219	0.120219	Significant	Down	Statistical
Q9VP78	Stress_vs_OE	0.658134	0.146699	4.48629	12	0.000744214	0.00431757	NA	0.125	0.125	Significant	Up	Statistical
Q9VPR0	Stress_vs_OE	0.605756	0.0860931	7.03605	12	1.36384e-05	0.000230099	NA	0.166667	0.166667	Significant	Up	Statistical
Q9VPR3	Stress_vs_OE	-0.632107	0.14588	-4.33305	11	0.00118849	0.0061075	NA	0.166667	0.0833333	Significant	Down	Statistical
Q9VPU6	Stress_vs_OE	0.639374	0.185705	3.44296	11	0.00549585	0.0194602	NA	0.208333	0.208333	Significant	Up	Statistical
Q9VPU6	Control_vs_OE	0.731442	0.185705	3.93874	11	0.00231704	0.0161173	NA	0.291667	0.208333	Significant	Up	Statistical
Q9VQC4	Stress_vs_OE	1.01672	0.349703	2.90739	10	0.0156343	0.0425035	NA	0.516667	0.433333	Significant	Up	Statistical
Q9VQT5	Control_vs_OE	1.05939	0.149816	7.07128	12	1.2985e-05	0.000365173	NA	0	0	Significant	Up	Statistical
Q9VQT6	Control_vs_Stress	0.891081	0.24197	3.68262	11	0.00360933	0.027326	NA	0.25	0.166667	Significant	Up	Statistical
Q9VQT6	Control_vs_OE	1.23116	0.243046	5.06554	11	0.000363114	0.00412957	NA	0.291667	0.208333	Significant	Up	Statistical
Q9VQY4	Stress_vs_OE	0.715955	0.119293	6.00166	10	0.000131816	0.00120499	NA	0.194444	0.194444	Significant	Up	Statistical
Q9VR50	Stress_vs_OE	0.810616	0.165273	4.9047	12	0.000363055	0.00247926	NA	0.0416667	0.0416667	Significant	Up	Statistical
Q9VR50	Control_vs_Stress	-0.650241	0.165273	-3.93434	12	0.00198308	0.0187596	NA	0.166667	0.166667	Significant	Down	Statistical
Q9VRJ6	Stress_vs_OE	0.694462	0.124204	5.59131	12	0.000117755	0.00110733	NA	0.305556	0.222222	Significant	Up	Statistical
Q9VRP9	Stress_vs_OE	0.997822	0.144731	6.89434	12	1.6643e-05	0.000265191	NA	0.0833333	0.0833333	Significant	Up	Statistical
Q9VRP9	Control_vs_OE	0.734753	0.144731	5.07669	12	0.000272146	0.00332671	NA	0.208333	0.208333	Significant	Up	Statistical
Q9VRS4	Stress_vs_OE	Inf	NA	NA	NA	NA	0	oneCo	NA	NA	Significant	Up	Statistical
Q9VRS4	Control_vs_Stress	-Inf	NA	NA	NA	NA	0	oneCo	NA	NA	Significant	Down	Statistical
Q9VRY5	Stress_vs_OE	0.683686	0.106285	6.4326	12	3.2425e-05	0.000430053	NA	0	0	Significant	Up	Statistical
Q9VSH4	Stress_vs_OE	1.00048	0.109247	9.1579	12	9.1849e-07	3.57199e-05	NA	0.25	0.25	Significant	Up	Statistical
Q9VSH4	Control_vs_OE	0.951434	0.109247	8.70898	12	1.56012e-06	8.61636e-05	NA	0.393939	0.393939	Significant	Up	Statistical
Q9VT15	Control_vs_OE	-1.21051	0.308156	-3.92824	12	0.00200503	0.0145658	NA	0	0	Significant	Down	Statistical
Q9VT23	Control_vs_OE	-1.42306	0.378432	-3.76041	12	0.0027189	0.0180626	NA	0.166667	0.166667	Significant	Down	Statistical
Q9VT41	Stress_vs_OE	0.773602	0.161212	4.79867	12	0.000434519	0.00284047	NA	0.375	0.375	Significant	Up	Statistical
Q9VT61	Stress_vs_OE	1.41975	0.0998853	14.2138	12	7.18166e-09	9.98686e-07	NA	0.177083	0.177083	Significant	Up	Statistical
Q9VT61	Control_vs_OE	1.6217	0.0998853	16.2357	12	1.56683e-09	1.19706e-06	NA	0.395833	0.395833	Significant	Up	Statistical
Q9VTN9	Stress_vs_OE	0.793074	0.0965779	8.21176	12	2.87463e-06	8.04371e-05	NA	0.130208	0.130208	Significant	Up	Statistical
Q9VTY1	Stress_vs_OE	0.583106	0.114369	5.09845	11	0.000344881	0.00239434	NA	0.194444	0.194444	Significant	Up	Statistical
Q9VU75	Stress_vs_OE	0.831116	0.116663	7.1241	12	1.2067e-05	0.000209195	NA	0.141667	0.141667	Significant	Up	Statistical
Q9VU75	Control_vs_OE	0.759434	0.116663	6.50966	12	2.89523e-05	0.000660284	NA	0.233333	0.233333	Significant	Up	Statistical
Q9VU95	Stress_vs_OE	0.784271	0.136313	5.75346	12	9.11378e-05	0.000915167	NA	0.159091	0.159091	Significant	Up	Statistical
Q9VUV8	Stress_vs_OE	0.775285	0.210631	3.68077	11	0.00362093	0.0140877	NA	0.375	0.208333	Significant	Up	Statistical
Q9VUV8	Control_vs_OE	1.05424	0.210631	5.00514	11	0.000399279	0.00445152	NA	0.541667	0.291667	Significant	Up	Statistical
Q9VUW1	Stress_vs_OE	0.620098	0.0771963	8.03275	12	3.60579e-06	8.95994e-05	NA	0.0833333	0.0833333	Significant	Up	Statistical
Q9VUW1	Control_vs_OE	0.639754	0.0771963	8.28737	12	2.61501e-06	0.000127523	NA	0.180556	0.180556	Significant	Up	Statistical
Q9VV28	Stress_vs_OE	1.55187	0.17229	9.0073	12	1.09468e-06	3.90062e-05	NA	0	0	Significant	Up	Statistical
Q9VV28	Control_vs_OE	1.32812	0.17229	7.70864	12	5.48564e-06	0.000200771	NA	0	0	Significant	Up	Statistical
Q9VV49	Stress_vs_OE	1.00048	0.107686	9.29077	12	7.88194e-07	3.14524e-05	NA	0.297619	0.297619	Significant	Up	Statistical
Q9VV49	Control_vs_OE	0.659328	0.107686	6.1227	12	5.15526e-05	0.000972499	NA	0.5	0.5	Significant	Up	Statistical
Q9VVB8	Stress_vs_OE	Inf	NA	NA	NA	NA	0	oneCo	0.0833333	0	Significant	Up	Statistical
Q9VVB8	Control_vs_Stress	0.601899	0.0936973	6.42387	7	0.000359046	0.00631151	NA	0.583333	0	Significant	Up	Statistical
Q9VVB8	Control_vs_OE	Inf	NA	NA	NA	NA	0	oneCo	0.5	0	Significant	Up	Statistical
Q9VVC0	Control_vs_Stress	0.73207	0.177439	4.12576	11	0.00168416	0.0171615	NA	0.291667	0.291667	Significant	Up	Statistical
Q9VVC0	Control_vs_OE	0.965856	0.171703	5.62517	11	0.000154411	0.00215799	NA	0.541667	0.458333	Significant	Up	Statistical
Q9VVG5	Control_vs_Stress	-0.781502	0.106603	-7.33098	12	9.08553e-06	0.000473686	NA	0	0	Significant	Down	Statistical
Q9VVG5	Control_vs_OE	-0.762551	0.106603	-7.15321	12	1.15909e-05	0.000334167	NA	0	0	Significant	Down	Statistical
Q9VVK5	Control_vs_Stress	-0.772401	0.137906	-5.60093	10	0.000227394	0.00454395	NA	0.472222	0.388889	Significant	Down	Statistical
Q9VVK5	Control_vs_OE	-0.654852	0.13434	-4.8746	10	0.000647156	0.00633112	NA	0.25	0.166667	Significant	Down	Statistical
Q9VVM8	Stress_vs_OE	1.01092	0.173085	5.84058	11	0.000112423	0.00107258	NA	0.354167	0.270833	Significant	Up	Statistical
Q9VVM8	Control_vs_Stress	-1.10504	0.181533	-6.08725	11	7.87904e-05	0.00215173	NA	0.541667	0.458333	Significant	Down	Statistical
Q9VVV8	Control_vs_OE	0.668117	0.204188	3.27207	11	0.00743772	0.0362988	NA	0.6	0.6	Significant	Up	Statistical
Q9VWD1	Control_vs_OE	-0.738475	0.110628	-6.67532	12	2.27561e-05	0.000550481	NA	0.047619	0.047619	Significant	Down	Statistical
Q9VWJ6;X2JFR5;X2JL73	Stress_vs_OE	1.13701	0.111763	10.1734	11	6.22434e-07	2.65723e-05	NA	0.2	0.2	Significant	Up	Statistical
Q9VWJ6;X2JFR5;X2JL73	Control_vs_OE	0.850696	0.111763	7.61163	11	1.04509e-05	0.000322022	NA	0.45	0.366667	Significant	Up	Statistical
Q9VWP5	Stress_vs_OE	0.847162	0.210053	4.03308	12	0.00165998	0.007821	NA	0.375	0.375	Significant	Up	Statistical
Q9VXC1	Stress_vs_OE	0.770932	0.0912541	8.44819	12	2.14259e-06	6.64346e-05	NA	0.166667	0.166667	Significant	Up	Statistical
Q9VXE3;X2JC83;X2JE40;X2JKQ8	Stress_vs_OE	0.633783	0.161967	3.91305	12	0.00206085	0.00922667	NA	0.25	0.25	Significant	Up	Statistical
Q9VXE6	Stress_vs_OE	1.3244	0.178331	7.42662	12	7.98272e-06	0.00015273	NA	0.222222	0.222222	Significant	Up	Statistical
Q9VXE6	Control_vs_OE	1.15087	0.178331	6.45356	12	3.14383e-05	0.000689537	NA	0.555556	0.305556	Significant	Up	Statistical
Q9VXF9	Stress_vs_OE	-0.592536	0.092939	-6.37554	12	3.52801e-05	0.000450689	NA	0.025	0.025	Significant	Down	Statistical
Q9VY41	Control_vs_Stress	-Inf	NA	NA	NA	NA	0	oneCo	0.833333	0	Significant	Down	Statistical
Q9VY41	Control_vs_OE	-Inf	NA	NA	NA	NA	0	oneCo	0.416667	0	Significant	Down	Statistical
Q9VY42	Stress_vs_OE	0.613189	0.0531809	11.5303	12	7.53609e-08	6.40428e-06	NA	0.0897436	0.0897436	Significant	Up	Statistical
Q9VY62	Control_vs_Stress	-0.787783	0.0945141	-8.33508	4	0.00113226	0.0130586	NA	0.75	0	Significant	Down	Statistical
Q9VYS0	Stress_vs_OE	-3.84865	0.26019	-14.7917	9	1.2737e-07	8.72391e-06	NA	0.458333	0.125	Significant	Down	Statistical
Q9VYS0	Control_vs_Stress	3.62311	0.26019	13.9248	9	2.14844e-07	3.59252e-05	NA	0	0	Significant	Up	Statistical
Q9VYV6	Control_vs_Stress	0.833861	0.132	6.31715	12	3.84798e-05	0.00128458	NA	0.125	0.125	Significant	Up	Statistical
Q9VYV6	Control_vs_OE	0.805795	0.132	6.10453	12	5.29949e-05	0.000991546	NA	0.208333	0.208333	Significant	Up	Statistical
Q9VZ00;X2JEU3	Stress_vs_OE	1.01372	0.117731	8.61044	11	3.22492e-06	8.65449e-05	NA	0.275	0.275	Significant	Up	Statistical
Q9VZ00;X2JEU3	Control_vs_OE	1.01412	0.117731	8.61387	11	3.21251e-06	0.000144374	NA	0.525	0.441667	Significant	Up	Statistical
Q9VZ66	Stress_vs_OE	0.756098	0.237844	3.17897	11	0.00877721	0.0274565	NA	0.25	0	Significant	Up	Statistical
Q9VZ66	Control_vs_Stress	-0.959449	0.252271	-3.80324	11	0.0029268	0.023851	NA	0.25	0	Significant	Down	Statistical
Q9VZJ3	Stress_vs_OE	0.995253	0.199859	4.97978	5	0.0041765	0.0157227	NA	0.541667	0.125	Significant	Up	Statistical
Q9VZK4	Stress_vs_OE	1.09419	0.146351	7.47649	11	1.2357e-05	0.000213181	NA	0.0416667	0.0416667	Significant	Up	Statistical
Q9VZK4	Control_vs_OE	0.700865	0.146351	4.78893	11	0.000563274	0.00569333	NA	0.25	0.166667	Significant	Up	Statistical
Q9VZL6	Stress_vs_OE	0.583582	0.113928	5.12237	12	0.000252266	0.0019262	NA	0	0	Significant	Up	Statistical
Q9VZQ7	Stress_vs_OE	-2.01568	0.14361	-14.0357	12	8.28822e-09	1.11867e-06	NA	0.413194	0.413194	Significant	Down	Statistical
Q9VZQ7	Control_vs_Stress	2.19396	0.14361	15.2771	12	3.15173e-09	2.06573e-06	NA	0.0833333	0.0833333	Significant	Up	Statistical
Q9VZV5	Stress_vs_OE	0.66288	0.085504	7.75262	12	5.17833e-06	0.000114799	NA	0.208333	0.208333	Significant	Up	Statistical
Q9W043	Stress_vs_OE	0.613726	0.116301	5.27703	12	0.000195546	0.00158825	NA	0.239583	0.239583	Significant	Up	Statistical
Q9W060	Stress_vs_OE	0.929033	0.101753	9.13025	12	9.48406e-07	3.62074e-05	NA	0.185185	0.185185	Significant	Up	Statistical
Q9W060	Control_vs_OE	0.710783	0.101753	6.98535	12	1.4641e-05	0.000392481	NA	0.333333	0.333333	Significant	Up	Statistical
Q9W095	Stress_vs_OE	0.756294	0.18953	3.99037	12	0.00179249	0.00829521	NA	0.125	0.125	Significant	Up	Statistical
Q9W0C3	Stress_vs_OE	0.61547	0.0779447	7.89624	12	4.29646e-06	0.000101631	NA	0.0588235	0.0588235	Significant	Up	Statistical
Q9W0C3	Control_vs_OE	0.65358	0.0779447	8.38517	12	2.31581e-06	0.000117952	NA	0.176471	0.176471	Significant	Up	Statistical
Q9W0D6	Stress_vs_OE	0.961275	0.269949	3.56094	12	0.00391704	0.0149611	NA	0.333333	0.333333	Significant	Up	Statistical
Q9W0H9	Stress_vs_OE	0.845087	0.190642	4.43285	10	0.00126849	0.00639848	NA	0.416667	0.25	Significant	Up	Statistical
Q9W0H9	Control_vs_Stress	-0.69749	0.213144	-3.27239	10	0.00839627	0.0468775	NA	0.541667	0.375	Significant	Down	Statistical
Q9W0P5	Stress_vs_OE	0.611413	0.122496	4.99128	12	0.000313862	0.00222614	NA	0.0608974	0.0608974	Significant	Up	Statistical
Q9W0T1	Stress_vs_OE	0.888856	0.0411612	21.5945	12	5.68576e-11	4.31615e-08	NA	0.215278	0.215278	Significant	Up	Statistical
Q9W0T1	Control_vs_OE	0.693923	0.0411612	16.8587	12	1.01493e-09	9.30486e-07	NA	0.319444	0.319444	Significant	Up	Statistical
Q9W0Y2	Control_vs_Stress	-0.654413	0.107751	-6.0734	10	0.000119835	0.0029719	NA	0.333333	0.166667	Significant	Down	Statistical
Q9W136	Stress_vs_OE	0.584162	0.068287	8.55451	12	1.881e-06	6.03631e-05	NA	0.0648148	0.0648148	Significant	Up	Statistical
Q9W196	Stress_vs_OE	0.590081	0.107694	5.47926	12	0.000140872	0.00126262	NA	0.1875	0.1875	Significant	Up	Statistical
Q9W1E9	Stress_vs_OE	0.815314	0.253556	3.21551	12	0.00741597	0.0242752	NA	0.222222	0.222222	Significant	Up	Statistical
Q9W1F4	Control_vs_OE	0.604615	0.0775271	7.79875	12	4.87566e-06	0.000190715	NA	0.25	0.25	Significant	Up	Statistical
Q9W1H5	Control_vs_OE	0.616407	0.101642	6.06448	12	5.63274e-05	0.00104115	NA	0.447917	0.447917	Significant	Up	Statistical
Q9W1N3	Control_vs_OE	-0.904185	0.203538	-4.44234	12	0.000803555	0.00735229	NA	0.09375	0.09375	Significant	Down	Statistical
Q9W223	Control_vs_Stress	-Inf	NA	NA	NA	NA	0	oneCo	0.833333	0	Significant	Down	Statistical
Q9W223	Control_vs_OE	-Inf	NA	NA	NA	NA	0	oneCo	0.75	0	Significant	Down	Statistical
Q9W247	Stress_vs_OE	0.616035	0.0766827	8.03355	12	3.60211e-06	8.95994e-05	NA	0.128571	0.128571	Significant	Up	Statistical
Q9W278	Control_vs_Stress	0.605777	0.143175	4.23102	10	0.00174099	0.017252	NA	0.520833	0.4375	Significant	Up	Statistical
Q9W2J3	Stress_vs_OE	0.651113	0.111756	5.8262	12	8.13387e-05	0.000852199	NA	0.113636	0.113636	Significant	Up	Statistical
Q9W2J5	Stress_vs_OE	-1.58495	0.152739	-10.3768	12	2.39806e-07	1.41086e-05	NA	0.292735	0.292735	Significant	Down	Statistical
Q9W2J5	Control_vs_Stress	1.49652	0.152739	9.79788	12	4.46338e-07	5.68833e-05	NA	0.0512821	0.0512821	Significant	Up	Statistical
Q9W370	Control_vs_Stress	0.628753	0.0951842	6.60564	12	2.51705e-05	0.000956935	NA	0.0833333	0.0833333	Significant	Up	Statistical
Q9W3E2	Stress_vs_OE	0.814203	0.0500123	16.2801	12	1.51831e-09	4.09855e-07	NA	0.107143	0.107143	Significant	Up	Statistical
Q9W3K6	Stress_vs_OE	1.32602	0.0837978	15.824	12	2.10524e-09	4.60046e-07	NA	0.133333	0.133333	Significant	Up	Statistical
Q9W3K6	Control_vs_OE	1.06952	0.0837978	12.7631	12	2.42595e-08	4.44823e-06	NA	0.372222	0.372222	Significant	Up	Statistical
Q9W3L4	Control_vs_Stress	-1.02165	0.0827796	-12.3418	12	3.53423e-08	1.24731e-05	NA	0.181548	0.181548	Significant	Down	Statistical
Q9W3M3	Stress_vs_OE	0.602434	0.123925	4.86127	12	0.000390712	0.00261367	NA	0.180556	0.180556	Significant	Up	Statistical
Q9W3U0	Control_vs_Stress	0.634048	0.160988	3.93849	12	0.00196827	0.0186619	NA	0.145833	0.145833	Significant	Up	Statistical
Q9W3W7	Control_vs_Stress	-0.84853	0.152641	-5.559	12	0.00012398	0.00305817	NA	0.208333	0.208333	Significant	Down	Statistical
Q9W403	Stress_vs_OE	0.781725	0.200778	3.89348	12	0.00213512	0.00947589	NA	0.277778	0.277778	Significant	Up	Statistical
Q9W403	Control_vs_OE	0.811538	0.200778	4.04197	12	0.0016337	0.0123375	NA	0.416667	0.416667	Significant	Up	Statistical
Q9W420	Stress_vs_OE	0.73276	0.126498	5.79269	12	8.57074e-05	0.00087989	NA	0.227273	0.227273	Significant	Up	Statistical
Q9W437	Stress_vs_OE	0.638155	0.173594	3.67613	10	0.00427361	0.0159673	NA	0.266667	0.266667	Significant	Up	Statistical
Q9W452	Stress_vs_OE	0.743428	0.139407	5.3328	12	0.000178534	0.00150053	NA	0.166667	0.166667	Significant	Up	Statistical
Q9W452	Control_vs_Stress	-0.803672	0.139407	-5.76495	12	8.9511e-05	0.00240162	NA	0.333333	0.333333	Significant	Down	Statistical
Q9W4A6	Stress_vs_OE	-0.651973	0.0645092	-10.1067	12	3.19302e-07	1.59269e-05	NA	0	0	Significant	Down	Statistical
Q9W4C5	Control_vs_OE	-0.651505	0.114464	-5.69177	7	0.000741638	0.0069952	NA	0.666667	0.333333	Significant	Down	Statistical
Q9W4W4	Stress_vs_OE	0.664372	0.163896	4.05362	12	0.00159992	0.0076162	NA	0.345238	0.345238	Significant	Up	Statistical
Q9W4Z1;X2JI50	Stress_vs_OE	0.598105	0.159152	3.75808	12	0.00273048	0.011464	NA	0.183333	0.183333	Significant	Up	Statistical
Q9W4Z1;X2JI50	Control_vs_OE	0.598237	0.159152	3.75891	12	0.00272635	0.0180626	NA	0.266667	0.266667	Significant	Up	Statistical
Q9W513	Stress_vs_OE	0.828447	0.233074	3.55445	9	0.00617275	0.0211709	NA	0.333333	0.0833333	Significant	Up	Statistical
Q9W542	Stress_vs_OE	0.943921	0.117691	8.02034	12	3.66336e-06	8.98992e-05	NA	0.222222	0.222222	Significant	Up	Statistical
Q9W551	Stress_vs_OE	0.899969	0.124641	7.22049	12	1.05655e-05	0.000193167	NA	0.138889	0.138889	Significant	Up	Statistical
Q9W551	Control_vs_Stress	-0.634244	0.124641	-5.08857	12	0.000266823	0.00504209	NA	0.305556	0.305556	Significant	Down	Statistical
Q9W569	Stress_vs_OE	0.665384	0.132937	5.00525	9	0.000733691	0.00427183	NA	0.0833333	0	Significant	Up	Statistical
Q9W5B5	Stress_vs_OE	0.582515	0.149287	3.90199	11	0.00246813	0.0106051	NA	0.3	0.3	Significant	Up	Statistical
Q9XZ06	Stress_vs_OE	0.870433	0.115776	7.51825	12	7.05926e-06	0.000141463	NA	0.125	0.125	Significant	Up	Statistical
Q9XZ06	Control_vs_OE	0.765054	0.115776	6.60805	12	2.50826e-05	0.000586625	NA	0.395833	0.395833	Significant	Up	Statistical
Q9XZS3	Stress_vs_OE	0.717032	0.186344	3.8479	12	0.002319	0.0100585	NA	0	0	Significant	Up	Statistical
R9PY51	Stress_vs_OE	1.10382	0.102927	10.7242	12	1.67397e-07	1.09377e-05	NA	0	0	Significant	Up	Statistical
R9PY51	Control_vs_OE	0.964535	0.102927	9.37105	12	7.19188e-07	4.70965e-05	NA	0.047619	0.047619	Significant	Up	Statistical
