# Supplementary material for: miR-34 regulates stress-induced depression-like state through the WDR26 ortholog melancholy in Drosophila
Source: Research Square preprint supplement (doi:10.21203/rs.3.rs-9339604/v1), 2026-04-08
Supplement: Supplementary file 2 [file 94a5229ee910bc9a0bb8093f.xlsx]

## Sheet: Sheet1
normalized_protein_matrix
	sample9	sample10	sample13	sample14	sample15	sample17
A0A021WW64;Q8SYH8	4.64384	4.57322	4.35455	3.83994	4.58288	4.42359
A0A023GPN7;A4V4N7;B7Z0Z5;B7Z0Z6;M9NFA0;Q9VXC4;X2JC90;X2JFS7	5.28279	5.31851	4.80296	4.98292	4.80511	4.52143
A0A076NAB7;A8DYK6	5.25748	5.15438	5.21069	5.20486	5.24367	5.16899
A0A0B4JCS1	6.04365	5.749	5.6994	5.77311	5.71605	5.54404
A0A0B4JCU7;A0A0B4JD53;A0A0B4JDA7;A0A0B4K7H5;Q8MLN6;Q9W122	5.34243	5.22734	5.4424	5.38537	5.47314	5.59921
A0A0B4JCV4;A0A0B4JD97;A0A0B4K6I7;A0A0B4KFK1;Q86BB5;Q8IPN1;Q95TU9;Q9VN51	4.73327	4.77702	4.86712	4.87465	4.74222	4.70471
A0A0B4JCW7;A0A0B4LGZ2;A0A0B4LH08;Q9VH10	3.5425	3.57977	3.88555	3.34838	2.98263	2.9531
A0A0B4JD00;A8DY69	4.89121	4.85963	4.78545	4.75906	4.67165	4.49808
A0A0B4JD13	5.35951	5.29587	5.34554	5.25482	5.34214	5.23313
A0A0B4JD15;Q0E9A7	4.63307	4.75	4.46305	4.26027	4.44895	4.17852
A0A0B4JD23;A0A0B4JDE3;A0A0B4KHF5;A0A0B4KHJ3;A0A0B4KHW7;Q7KRU0;Q8IMI0;Q961V3;Q9VA53	5.46292	5.40823	5.42718	5.38032	5.31943	5.23727
A0A0B4JD38;A0A0B4K738;A0A0B4KEJ9;A0A0B4KEQ3;A0A0B4KF87;A0A0B4KFK3;A0A0C4DHC4;A8DY93;A8DY94	4.43582	4.26806	3.77611	3.86885	3.82355	3.47641
A0A0B4JD54	5.71587	5.71098	5.76179	5.66426	NA	5.78567
A0A0B4JD57;A0A0B4JD95;A0A0B4K7Q4;Q59E58;Q59E59	5.44981	5.16426	4.96163	5.11536	5.26677	4.82277
A0A0B4JD78;A0A0B4KG15	4.85512	4.35071	4.36766	5.04326	4.52444	NA
A0A0B4JDA0;Q9VF03	5.32316	5.23652	5.31088	5.32684	5.09651	5.02776
A0A0B4JDB9;Q8T3K5	4.36664	4.55816	4.45371	4.36701	4.41524	4.30218
A0A0B4JDC8;Q9VFD3	5.05427	5.09721	4.76835	4.81619	4.55188	4.53596
A0A0B4K5Z8;A0A0B4K6T4;Q9VNF8	5.55673	5.56934	5.48232	5.52425	5.5027	5.38761
A0A0B4K604;A0A0B4K6L1;Q9I7L5	4.61114	4.35929	4.44104	4.3649	4.37795	4.15932
A0A0B4K609;A0A0B4K642;A0A126GUR3;A0A126GUS1;Q9VHQ8;Q9VHR2	4.61607	4.43104	4.29853	4.33588	3.92616	4.29675
A0A0B4K618;A0A126GUS7	3.68536	3.1972	3.7155	3.95786	2.57104	3.18122
A0A0B4K620	5.63611	5.63512	5.56664	5.54707	5.57361	5.59128
A0A0B4K657;Q59DW9;Q6XK19	4.12342	4.05224	3.89055	3.92371	3.53643	3.61633
A0A0B4K686;A0A0B4K6C8;A0A0B4K760;Q9VE20	4.62432	4.66397	4.65421	4.50961	4.54225	4.33161
A0A0B4K692	5.40967	5.34429	5.31557	5.16207	5.7009	5.84184
A0A0B4K6B1;A0A0B4K6M2	4.16545	3.8389	3.81605	4.11762	NA	3.74923
A0A0B4K6F9;A0A0B4KGU9;Q7KS16;Q9VC62	5.22988	5.16097	5.10622	5.1432	5.19235	5.17154
A0A0B4K6G5;Q9VCS7	4.46144	4.33019	4.2188	4.64126	NA	4.44045
A0A0B4K6I1;A0A0B4KI37	5.0061	5.06033	5.06907	4.89279	5.01822	4.97458
A0A0B4K6K8;A0A0B4KGY9;A0A0B4KHV4;Q8IMS8;Q9VBQ1	5.19033	4.86176	4.85132	4.72007	4.43805	4.25406
A0A0B4K6M4;A0A0B4K7W1;A0A0B4KHN3;E1JIZ0;E1JIZ2	4.90782	4.80387	4.84737	4.85483	4.79344	4.65645
A0A0B4K6N4;A8JRH3	5.58748	5.55945	5.65393	5.53232	5.66771	5.67256
A0A0B4K6P4;A0A0B4K6W9;A0A0B4LHY1;A8JRI1;Q7KES3;Q7KRS7;Q8IMF8;Q8WR53;Q95UI6	4.93571	4.87599	4.92725	4.89368	4.7088	4.908
A0A0B4K6V0	4.27577	3.88971	4.53408	3.95354	3.28257	NA
A0A0B4K6V8;Q95U30	5.06701	5.22325	4.84895	4.73997	4.7832	4.50128
A0A0B4K6W0;A0A0B4K7L3;A0A0B4KEH7;A0A6M3Q762;A0A6M3Q831;A0A6M3QH40;A1Z867;B7YZD8;B7YZD9	3.95074	4.01471	4.24515	4.02073	3.77772	3.97672
A0A0B4K6X5	6.2276	6.41294	6.41407	6.23958	5.73804	5.50681
A0A0B4K707;A0A0B4KGR1;A0A6H2EDN5	4.65166	4.92833	4.86376	4.83325	4.36084	4.62859
A0A0B4K709;A0A126GV09;Q9VCG8	5.68529	5.59403	5.76461	5.628	5.77055	5.78255
A0A0B4K765;A0A0B4LF82;A0A0B4LF93;A0A126GUN9;A1Z927;A1Z928;Q5U0Y0	4.75134	4.62122	4.47597	4.42429	3.86399	3.73778
A0A0B4K774;A0A0B4KH51;Q9Y0S9	4.65744	4.69155	4.59258	4.66078	4.46547	4.37556
A0A0B4K7A5	6.06522	5.85508	6.24719	5.88374	6.04108	5.82671
A0A0B4K7C1	5.96066	5.96279	6.08809	6.00723	6.11475	5.87167
A0A0B4K7D8;Q7K161	5.11285	5.11263	5.13076	4.98243	4.99273	4.59272
A0A0B4K7E3;Q0E8Y1;Q9W1Y3	5.30283	5.21681	5.04445	5.09098	4.83133	4.933
A0A0B4K7H0;Q7KN74	5.61601	5.49481	5.39105	5.33563	5.41031	5.33901
A0A0B4K7H1;A0A0B4K819;A1Z6P2	5.58407	5.46275	6.27566	6.09959	5.68622	5.89055
A0A0B4K7H3	6.10921	6.18968	6.22261	6.08247	6.1157	6.00925
A0A0B4K7I2;A0A0B4K7W3	4.68808	4.6994	4.62379	4.63593	4.65539	4.54239
A0A0B4K7J2	5.15314	5.09624	5.07099	5.06782	4.69338	4.47699
A0A0B4K7K9;A8DY79	5.08794	4.96508	5.34424	5.15366	4.04026	3.66279
A0A0B4K7L8;A0A0B4KH77;A8JRD7;Q9VBA3	4.17656	3.9017	3.66978	3.85444	4.14338	4.20012
A0A0B4K7N0;A1Z8W8;A1Z8W9	3.61491	3.67835	3.46209	3.68661	3.39426	3.26982
A0A0B4K7N7	5.1891	5.17702	5.39602	5.2581	5.18606	5.20997
A0A0B4K7P4;A0A0B4K866;Q7K0H4	4.42646	4.18981	4.32218	4.17579	4.35795	4.18941
A0A0B4K7P8;A0A0B4K7Y9;E1JH62;E1JH63	4.5685	4.30657	4.48885	4.49837	4.05584	3.91001
A0A0B4K7Q6;Q9VCH4	4.61184	4.55893	4.43851	4.59816	4.61733	4.42823
A0A0B4K7V2;Q8MRD1	5.38783	5.2549	5.35549	5.30524	5.36413	5.53422
A0A0B4K7V4	4.84092	4.66534	4.71301	4.48504	4.72085	4.74486
A0A0B4K7X5;A0A0B4LFW5;A0A0B4LG29;A0A0B4LG72;Q9W2J6	5.4996	5.3685	5.48957	5.40198	5.51522	5.50664
A0A0B4K7Y0	4.92449	4.93075	4.91697	4.78315	5.00029	4.9973
A0A0B4K7Y4;A0A0B4KFL2;A1Z9D9;A1Z9E0	5.12156	4.91837	4.32068	4.3913	4.33159	4.62267
A0A0B4K7Z0;A0A0B4LF25;A0A0B4LFA9;A1Z9K8	4.89097	4.82518	4.85206	5.02904	4.84391	4.55893
A0A0B4K7Z1	5.36761	5.33166	5.297	5.25795	5.3121	5.34717
A0A0B4K837	4.9226	4.87087	4.97795	4.74461	4.89806	4.43956
A0A0B4K859	3.25324	3.18797	3.01652	3.03334	2.69583	1.45784
A0A0B4K891;Q7K581	5.00736	4.95701	5.04815	5.11819	4.74676	4.54696
A0A0B4KEE4	4.42674	4.38067	4.5257	4.62935	4.04891	4.1209
A0A0B4KEE5	5.8646	5.75373	5.94679	5.7995	5.82679	5.79202
A0A0B4KEE7;A1Z734;E1JGZ7;E1JGZ8	3.75755	3.91612	3.66869	3.82673	3.73102	3.64956
A0A0B4KEG0;A0A0B4KEH3;A0A0B4KF27;A0A0B4KFF1;Q7JW73	4.71599	4.68941	4.70886	4.46938	4.54103	4.37027
A0A0B4KEJ7	5.65416	5.60282	5.83853	5.79966	5.80931	5.82682
A0A0B4KEL0;A0A0B4KF99;A0A0C4DHC8;A1Z6Z3;A1Z6Z4	5.85702	5.89843	5.82512	5.76192	5.7875	5.79542
A0A0B4KEP1;A0A0B4KF25;A0A0B4KFM5;A0A0B4KFX4;A0A0B4LFC1;A1Z9L0;A1Z9L2;Q8T076	4.69472	4.50796	4.67827	4.59436	4.22501	4.16774
A0A0B4KER0;Q5U156	5.07276	4.96025	4.97683	4.97539	4.44073	4.39014
A0A0B4KEU5;Q7JVY0	5.2877	5.40057	5.56311	5.56672	5.58415	5.45123
A0A0B4KEU8;A1ZBK3	5.24783	5.03472	5.0275	4.62863	5.26238	5.28611
A0A0B4KEW6	5.95529	5.87112	5.79217	5.66722	5.76519	5.60477
A0A0B4KEX6;A0A0B4KFF9;Q9W205	4.47992	4.51011	4.48174	4.51581	4.39168	4.38274
A0A0B4KF15;A1Z7F4;A1Z7F5;B7YZT0	5.27901	5.21132	5.12157	5.02652	5.29961	5.20081
A0A0B4KF22;Q9VN72	NA	4.26345	4.67858	4.89419	4.66633	4.77879
A0A0B4KF38	5.80762	5.70495	5.87339	5.73404	NA	4.917
A0A0B4KF40;B7YZP4;Q9W1L7	5.27591	5.26627	5.13855	4.95027	5.12921	4.73442
A0A0B4KF54;A1Z6P8	4.43769	4.36644	4.12583	4.10135	4.1442	4.05146
A0A0B4KF61;Q9VN04	5.2788	5.37343	5.6113	5.43911	5.33668	5.32315
A0A0B4KF69;A0A6M3Q7C8;A1ZA05;Q0E965	4.93694	4.98424	5.05602	5.02666	5.02919	5.02004
A0A0B4KF84;A0A0B4KG35	4.68651	4.59216	4.5878	4.5551	4.19825	4.02291
A0A0B4KF86;Q7JQL5	4.70823	4.85586	4.64267	4.60477	4.56935	4.3131
A0A0B4KF90;A0A0B4KFE2;A0A0B4KGC6;B7Z0U7;E1JJ78	4.78582	4.77302	4.68812	4.65849	4.8657	4.64239
A0A0B4KF92;A0A0B4LGM5;A0A0B4LGS6;Q9VNC3	4.67984	4.40957	4.47927	4.30567	4.41764	4.46333
A0A0B4KFA6;A0A0B4KGE4;Q9VHX9	6.70004	6.59764	6.50601	6.44938	6.60523	6.53509
A0A0B4KFB0	4.64617	4.55486	4.32308	4.40189	4.52323	4.41709
A0A0B4KFB8	4.47827	4.56276	4.37439	4.33536	3.86573	3.79808
A0A0B4KFD1;A1Z7C4	4.07549	4.14861	3.97414	3.9259	4.11605	4.22293
A0A0B4KFD5	5.01727	4.89595	4.62951	4.86794	4.54238	4.69411
A0A0B4KFE4;A1Z7H2;A1Z7H3;Q8T3L1	5.49217	5.54785	5.30619	5.35093	5.48131	5.36216
A0A0B4KFF6;A8DY77;Q7K304	4.4049	4.14627	5.19244	4.65411	3.26311	2.84117
A0A0B4KFH9;Q9VHA5	5.31558	5.40593	5.62008	5.66861	5.56999	5.55478
A0A0B4KFJ0;Q9VH65	4.67903	4.84627	4.53766	4.82599	4.41612	4.33494
A0A0B4KFK4;A0A0B4KFP1;Q0KI92;Q9VH17	3.997	3.98511	4.04877	3.95128	3.89949	4.17757
A0A0B4KFQ0;A0A0B4KG50;A0A0B4KGR9;A0A0B4KH36;Q9VH01	4.69976	4.56251	4.1591	4.23755	4.23444	4.06739
A0A0B4KFT9;Q7KNS5	6.07518	5.91018	6.04601	6.11994	5.79118	5.76587
A0A0B4KFX1;A0A0B4LH23;E1JGP2;Q9W2N4	5.44003	5.39395	5.38772	5.18942	5.25242	4.97724
A0A0B4KFY8	5.70102	5.73038	5.64402	5.54145	5.60647	5.48205
A0A0B4KFZ1;D1Z394;Q6NR72;Q8MLR2	6.95038	6.80996	6.80816	6.66195	6.48683	6.46455
A0A0B4KFZ2;Q6AWD5;Q9VHC4	4.07012	3.91438	4.09451	3.95636	4.0661	3.81351
A0A0B4KFZ4;O76137	5.98086	5.72043	6.18326	5.91629	5.60336	5.57914
A0A0B4KG24	6.45156	6.59404	6.28723	6.22275	6.29381	6.20507
A0A0B4KG43;A0A0B4KGI6;Q8IPP4;Q9VN82	4.8436	4.83303	5.02132	4.94232	4.63991	4.95928
A0A0B4KG70;B7Z0T5;Q9VNF6;Q9VNF7	5.01846	5.00982	4.73485	4.63937	4.49188	4.50165
A0A0B4KG76;A0A0B4KGK7;E1JJ52;Q8IPP5;Q9VNG9	4.06777	4.19393	3.95612	4.14137	3.81245	3.84144
A0A0B4KG94	5.98168	5.9096	5.86562	5.88193	5.76276	5.57389
A0A0B4KG96;Q9N6D7	3.25876	3.27866	3.49308	3.70605	3.03867	2.93833
A0A0B4KGC9;A0A0B4KGH7;A0A0B4KHF1;E1JIQ4;Q8IN65;Q9VDT8	4.60943	4.71116	4.67174	4.63159	4.45696	4.54662
A0A0B4KGF5;Q8MQJ5;Q9VE69	5.9359	5.85355	5.99564	5.81298	5.77237	5.77357
A0A0B4KGF7;Q0KIE6;Q9VMY5	4.93319	4.86029	4.86614	4.81778	4.5876	4.59458
A0A0B4KGG9	5.08627	4.92456	4.97408	5.23462	4.83947	5.0193
A0A0B4KGI5;E1JIJ8	5.68115	5.78808	5.34183	5.26453	5.54265	5.66315
A0A0B4KGK8;A0A0B4KH21;A0A0B4KH24	5.92044	6.07591	6.22603	6.00197	6.03398	6.02488
A0A0B4KGN2	4.05736	4.06998	3.9695	3.9889	4.21967	4.31537
A0A0B4KGP4	4.91446	4.97088	4.91402	4.83259	4.98554	5.01843
A0A0B4KGQ0;Q9VCI7	5.6046	5.5508	5.45607	5.53797	5.4743	5.27493
A0A0B4KGS4;Q9VEV1	5.47826	5.48684	5.77437	5.42004	5.52324	5.5904
A0A0B4KGW6;Q9VEB9	5.30295	5.00167	5.1502	5.16254	5.12872	4.76624
A0A0B4KGX5;E1JIG3;Q9VHH2	4.52024	4.27243	4.53353	4.42482	4.34686	4.12856
A0A0B4KGY1	4.20011	4.19841	4.70653	4.52194	4.16557	4.43401
A0A0B4KGY2;Q8IMW9;Q9VC89	4.88422	4.87099	4.76201	4.85372	4.7271	4.67279
A0A0B4KGY6	6.09404	6.10694	6.01119	6.09109	6.06567	5.93905
A0A0B4KH03	5.58496	5.49102	5.74498	5.44702	5.48402	5.58251
A0A0B4KH14;Q9VBF0	5.23203	5.14717	5.00393	5.04812	5.22052	5.1133
A0A0B4KH28;Q9VDI1	5.03901	5.06236	5.0526	5.06267	5.06664	4.98213
A0A0B4KH34	5.51614	5.8626	5.67267	5.78445	6.15633	6.17027
A0A0B4KH42	4.54662	4.8478	4.69104	4.54262	4.45936	NA
A0A0B4KH64;Q7KRX5;Q9VB04	6.00561	5.94809	6.16976	5.96264	5.99812	5.4688
A0A0B4KH68;B7Z0Q8;Q8IMR0;Q8IMR1	3.26485	3.01983	3.24091	3.13143	3.13339	3.08531
A0A0B4KH70;A0A0B4KHB5;A0A0B4LIU0;E1JIZ9;Q9VAX3	4.91937	5.01984	5.09634	5.1369	4.57714	4.69384
A0A0B4KH84;Q9VB82	6.22298	6.22307	6.50273	6.54274	6.12485	6.15103
A0A0B4KHA7;A0A0B4KHT8;Q32KC6;Q8MQS2	5.87194	5.79338	5.71435	5.5631	5.88063	5.87374
A0A0B4KHB7;B8A403;Q9VCF4	5.79563	5.96366	5.62549	5.67127	5.71472	5.51674
A0A0B4KHB9;A0A0B4KHP7;B7Z0L6;Q0KI58;Q5BIJ2;Q8IN90	5.53573	5.49039	5.39941	5.50613	5.48421	5.35507
A0A0B4KHC3;Q9VE91	5.01939	4.66502	4.88256	4.84964	4.60493	4.30679
A0A0B4KHD2;B7Z0R2;Q9VAS8	3.43991	3.28151	3.62358	3.65762	3.4522	3.31615
A0A0B4KHF0	3.39956	3.89869	4.6008	4.123	4.28177	4.378
A0A0B4KHJ9	6.62913	6.47507	6.72571	6.64225	6.61953	6.54821
A0A0B4KHK0;Q9VBQ6	5.01986	4.62989	4.72085	4.88179	4.69571	4.29358
A0A0B4KHK1;Q9VDE3	4.62676	4.71712	4.80881	4.75897	4.62265	4.66206
A0A0B4KHT3	5.56981	5.74702	5.59214	5.62697	5.34947	5.26335
A0A0B4KHT5	6.26912	6.31919	6.32248	6.36191	6.0222	5.87755
A0A0B4KHW3	5.70592	5.77335	5.03997	5.11382	5.3049	4.70089
A0A0B4KHW9;A0A0B4KI25;A8JRD0;A8JRD1;A8JRD2;E1JIX9;Q6NP71;Q9VBN0;Q9VBN1	4.93191	4.83203	5.01836	4.80686	4.90452	4.91429
A0A0B4KHX4;A0A0B4KI28;Q59DT9;Q8IMS2;Q9VBJ2	4.40978	4.43368	4.63286	4.43858	4.39527	4.23159
A0A0B4KHZ0;A0A0B4KI43;A8JRE3;Q9VB55	5.51729	5.41279	5.42635	5.42607	5.03257	4.85515
A0A0B4KI23	4.78142	5.06866	3.36859	3.54103	4.15744	4.07847
A0A0B4KI34	5.2207	5.25975	5.2791	5.2471	5.0626	5.1845
A0A0B4LEK8;A1Z813	5.38208	5.28059	5.27658	5.32262	5.21226	5.16811
A0A0B4LES9;A8DY62	4.13374	3.60359	3.80364	3.67388	4.05211	4.01946
A0A0B4LET0;Q7K4C2	4.92207	5.1548	5.13989	4.92473	4.98357	5.11116
A0A0B4LEY1;A0A0B4LEZ1;A1Z7J6;A1Z7J7	5.16276	5.27047	5.02489	5.0486	4.95699	4.77788
A0A0B4LF29;A0A0B4LFC7;A0A126GUP1;A1Z9M3;A1Z9M4;A8DYD1;A8DYD2;A8DYD3;B7YZE6;Q7KHK4	3.4139	3.2409	3.22736	2.91268	2.60114	2.6872
A0A0B4LF50;A0A0B4LG64;A1Z8S4;Q8T085	5.18054	5.16292	5.0223	4.92497	4.73316	4.83465
A0A0B4LF95;A1Z944	4.33388	4.29827	3.95829	4.0698	3.69924	3.81865
A0A0B4LFH2;Q7JUP3	5.25044	5.00709	5.22531	4.81288	4.87636	4.8438
A0A0B4LFL6;Q8T017	6.10721	6.13108	5.92997	5.85821	6.03751	5.985
A0A0B4LFP2;Q9W5T4	4.8305	4.6467	4.64567	4.62142	4.60303	4.66255
A0A0B4LFQ3;A0A0B4LFV0;A0A0B4LGY8;A1ZBH7;A1ZBH8	5.11738	5.25355	5.01033	4.89495	4.76352	4.32997
A0A0B4LFR4;Q7K110	5.82533	5.65268	5.63944	5.64816	5.6579	5.59077
A0A0B4LFU6;A0A0B4LGY4;A1ZBG9;A1ZBH0;Q7K173	5.8461	5.80459	5.5797	5.50542	5.68097	5.62312
A0A0B4LFW3;Q7K088	5.84961	5.84638	6.37575	5.93026	6.32839	5.64423
A0A0B4LFW6;A1Z7S0	4.45537	4.29693	4.2607	4.28266	4.2919	4.14201
A0A0B4LG34;A8DYM0;Q9W263	4.6959	4.48368	4.37481	4.43527	4.40763	4.25885
A0A0B4LG95;A0A0B4LGC6;Q7K274;Q8MLS7	5.88328	5.81864	5.67044	5.79156	5.89502	5.78317
A0A0B4LGB0;Q24007;Q8MLT4	4.08478	4.11831	4.1743	3.88771	4.12013	4.38523
A0A0B4LGB7	5.60191	5.61325	5.93282	5.7021	6.16215	6.30105
A0A0B4LGD3	6.45199	6.40484	6.32795	6.24401	6.48259	6.40679
A0A0B4LGF5;A1Z9N0	5.75868	5.71487	5.60696	5.58149	5.51783	5.44083
A0A0B4LGH8;Q9W1D9	5.02103	5.01869	4.90656	4.89823	4.81816	4.81059
A0A0B4LGI1	6.15178	5.68559	6.17884	6.13065	6.24608	6.15584
A0A0B4LGI9;H0RNI8	5.93549	5.85375	6.17063	5.96029	6.09215	6.08494
A0A0B4LGJ9;A0A0B4LHH1;Q960R0;Q9W1B5	5.23086	5.30561	5.03599	4.89398	5.03462	4.94007
A0A0B4LGP3;Q7KVF1;Q9W0X0	5.86638	5.78817	5.58676	5.5556	5.60611	5.71122
A0A0B4LGT2;Q9VHY7	5.38931	5.18901	4.99695	4.9004	4.98429	4.76867
A0A0B4LGV1	6.78015	6.68741	6.32576	6.46094	6.47159	6.59201
A0A0B4LGZ0;A0A0B4LI11	5.21163	5.15142	5.05977	5.07696	5.01899	5.03522
A0A0B4LH25;A8DYK5;Q9W2K4	5.32504	5.24262	5.13201	5.34623	4.46793	4.54337
A0A0B4LH32;A0A6M3Q832;A0A6M3Q8E0;A0A6M3Q8I0;A0A6M3Q9J1;A0A6M3QHD0;A0A6M3QHJ1;B7YZM3;B7YZM4;B7YZM5;B7YZM6;B7YZM7;E1JGQ4;Q7KVP5;Q7KVP6;Q9W2I0	4.994	4.73518	4.84113	4.75253	4.39797	4.53665
A0A0B4LH71;A0A4D6K1Y5;A0A4D6K595;F3YDF6	8.21814	8.3923	8.09704	7.98415	8.12143	7.96372
A0A0B4LHC9;Q9W1I7	6.05575	6.03827	6.15429	6.03439	5.93782	6.05052
A0A0B4LHE0;Q8MLQ5	3.09316	3.07004	3.4129	3.09937	2.58918	3.54778
A0A0B4LHH8;A0A0B4LHQ0;A0A0B4LIF6;Q9VDB7	4.39008	4.23705	4.13777	3.97591	3.96092	3.99771
A0A0B4LHR2;A0A0B4LHR8;A0A126GV26;Q8IMP0	4.33978	4.27407	4.06958	3.95425	3.93039	3.88678
A0A0B4LHR4;Q8IN24;Q9Y133	4.27559	4.41554	3.9746	3.99158	3.92954	3.94082
A0A0B4LHS0;A0A0B4LHY5;A0A0B4LIP5;Q7K137	4.53325	4.7572	4.88734	4.70459	4.60138	4.86639
A0A0B4LI09;A8JPQ1	5.1031	4.85788	4.85302	4.90401	5.13481	5.0709
A0A0B4LID7;Q9VDS7	5.47915	5.46183	5.52767	5.47441	5.15073	5.0804
A0A0B4LIE8;Q8IN53;Q9VDL7	6.25736	6.1461	5.9622	5.75763	5.78483	5.90617
A0A0B4LIT4	3.85318	3.75381	3.53264	3.47764	3.63756	3.47437
A0A0B7P9G0	5.26597	5.10743	5.02211	5.0456	5.16444	5.14047
A0A0C4DHB3;A8JR16;A8JR17	3.82706	3.90285	4.15161	4.34644	4.79049	4.47374
A0A0C4DHB8;Q0KHZ4;Q8IMK1	4.59749	4.46777	4.5333	4.26375	4.31134	4.38038
A0A0C4DHE7	6.65026	6.59281	5.94745	6.09441	6.22845	6.49523
A0A0C4DHF6;A1ZA89;Q8STB9;Q8WR08	4.63252	4.69096	4.70904	4.66917	4.70858	4.74151
A0A0C4DHN3;A0A0C4DHN7;Q494G7;Q7PLD0	5.31408	5.03545	5.17687	4.8891	5.18118	5.33112
A0A0C4FEI8;Q9V3D8	5.79805	5.74421	5.80789	5.7749	5.77363	5.66189
A0A0S0WGR0;Q9W0B2	6.08935	6.01256	6.02359	6.26157	5.70151	5.77322
A0A0S0WGS4;A8DYW4	4.22224	4.29145	2.95244	3.95765	3.58054	3.71107
A0A0S0WGX2	5.25815	5.26105	5.11137	5.01212	4.79212	4.90845
A0A0S0WIA2	5.82439	5.69139	NA	5.22864	5.57861	5.36088
A0A0U1RVK6;Q9VIS3	6.30801	6.3785	6.03083	5.992	6.09998	5.59977
A0A126GUM1;A0A6M3Q7H0;A1Z8A4;A1Z8A6;Q7K0T7	5.07082	5.41828	4.99825	5.01967	4.62088	4.51419
A0A126GUP6	4.71689	4.81468	5.27802	4.89245	4.45655	4.6263
A0A126GUQ4;Q0KIA8;Q9VI16	4.9498	5.01571	5.00149	4.97459	4.95887	4.86922
A0A126GUV7;Q7KSD3	5.79263	5.75422	5.59341	5.61562	5.41361	5.48424
A0A126GV08;A8JPX0;E1JJ00	3.94545	4.02143	4.09185	4.00548	3.74245	3.72089
A0A126GV33;Q9VA29	3.92566	4.04073	3.67206	3.59702	3.07221	3.18293
A0A140SRF8;Q9VBU6	5.56706	5.31211	5.19091	5.28595	5.25579	5.22818
A0A1F4	6.27685	6.27364	6.23543	6.05492	6.11637	6.00886
A0A1W5PXH3	5.24738	5.39991	5.32052	5.19184	4.93663	5.00007
A0A1Z1CGX2;A0A1Z1CGY3;A0A1Z1CSK9	4.38348	4.38246	4.19244	4.09409	4.12168	3.78318
A0A1Z1CN86;Q9VHK7	6.12408	6.25849	6.54958	6.33922	6.52028	6.24758
A0A499GGQ3;Q7KT97	4.35889	4.11087	4.80166	4.27502	4.18414	4.1354
A0A4D6K0X3;A0A4D6K216;A0A4D6K327;M9PC50;Q9VQ25;X2J6N9	4.09418	4.32445	3.8553	4.28628	3.80577	3.66396
A0A4D6K2Q4;Q9W3A5	6.15284	6.03012	6.17078	6.05659	5.93404	5.91782
A0A4D6K4X9;A4V1K1;Q9VRX8	4.83333	4.8272	4.69623	4.41323	4.50303	4.63063
A0A4P1SA55;Q8IPA2	5.02543	5.02589	4.19215	4.17214	4.56546	4.26595
A0A6H2EF15;M9PDQ2;Q9W4Q4	4.86373	4.7123	4.69137	5.01359	4.70643	4.39074
A0A6H2EFG8	5.90973	5.832	5.61743	5.60422	4.98888	4.75523
A0A6H2EG45;Q8IR85;Q9VYT2	3.38606	3.17901	3.44282	3.41395	3.06252	3.29404
A0A6H2EG56	5.82434	5.68202	5.66901	5.57143	5.69462	5.55313
A0A6H2EGA2	4.56184	4.42532	4.40305	4.32751	4.10329	4.31316
A0A6H2EIE0;A0A6H2EJK0	6.88241	6.70427	6.57897	6.49659	6.82085	6.94729
A0A6H2EJZ8;M9PFU0;Q9VK03	3.89538	3.71997	3.27547	3.34895	3.25927	3.19944
A0A6J3SW69;Q5BIG2	4.84606	4.50992	4.26046	4.45629	4.37955	4.5849
A0A6M3Q6V5;E1JHY7;Q8I0I5;Q9VTS4;X2JCC3	5.02714	5.06182	4.85989	5.00258	4.64805	4.78444
A0A6M3Q8Y2;A8JMD5;C6TP33	5.7158	5.3297	5.34947	5.57306	5.26677	4.92999
A0A6M3Q9I2;M9PEN8;Q9V3T3	6.39471	6.35859	6.15139	5.81125	6.2606	6.40107
A0AQH0	5.35111	5.45883	5.41328	5.52615	5.4993	5.52426
A1A714;Q960F6	4.73449	4.67298	4.50684	4.6104	4.61941	4.5249
A1YK02	4.71202	4.57731	4.42402	4.46594	3.77006	3.20562
A1Z6G4	5.39703	5.62813	5.32848	5.26234	5.3096	5.14875
A1Z6G9	5.42808	5.13063	5.20651	5.21639	4.54508	4.68354
A1Z6H0	5.22538	5.22406	5.51197	5.65392	5.57093	5.60316
A1Z6H4;Q7K1T1	5.04845	5.05201	4.96703	4.80261	4.7342	4.67296
A1Z6H6	4.92265	4.93045	4.98317	5.16999	4.60768	4.62842
A1Z6H7	4.29672	4.13229	4.34138	4.14205	3.18318	3.33599
A1Z6L9	5.64877	5.61411	5.56568	5.52007	5.39899	5.35611
A1Z6N4	5.14473	4.98538	4.82432	4.84576	4.83388	4.9628
A1Z6N5	5.22468	5.17254	5.02865	5.15452	4.92685	4.92445
A1Z6P3	5.41503	5.25555	5.37711	5.29241	5.26309	5.42576
A1Z6Q0;A4UZ58	3.89573	4.28093	3.93159	3.75757	4.36595	4.66792
A1Z6R7	5.14581	5.01962	5.09059	5.04716	5.05362	4.93233
A1Z6S7	5.1834	5.09688	5.00779	5.09934	4.92294	4.83528
A1Z6V5	4.9059	5.00486	5.42707	5.18641	4.88416	4.96697
A1Z6X6	6.28556	6.33763	6.23742	6.3768	6.39508	6.08068
A1Z6Z8;A1Z6Z9	5.2497	5.09964	5.14835	5.15733	4.64034	4.78408
A1Z705	4.8976	4.97983	NA	4.89341	4.60823	4.75096
A1Z713	5.23281	5.12435	5.17853	5.13057	5.128	5.09912
A1Z729	4.88033	4.94153	4.75855	4.71585	4.667	4.77112
A1Z746	4.15369	3.62882	3.8309	4.22906	3.95281	3.39122
A1Z782;A1Z783	4.18261	4.10295	3.72223	3.81396	3.36414	3.14917
A1Z784;Q7JV23	6.18374	6.12117	5.45438	5.54557	5.73056	5.17428
A1Z7A6	4.00739	3.51658	3.37602	3.93804	3.60617	3.39626
A1Z7B8	5.95625	5.79055	5.67449	5.62521	5.50135	5.50985
A1Z7F1	4.78547	5.07343	5.05999	4.76572	4.47995	4.57866
A1Z7G2	5.01605	4.60901	3.23663	3.51263	4.29426	4.93775
A1Z7H7	4.93841	4.96271	5.62245	5.33022	5.03313	4.96027
A1Z7H8	3.56473	3.9489	3.60171	3.74661	3.78832	3.69358
A1Z7K2	4.14306	4.56132	4.07431	4.32318	4.01823	3.77194
A1Z7K6	4.95185	4.81896	4.85309	4.83545	4.61669	4.55259
A1Z7K8	4.50694	4.51765	4.62481	4.55071	4.42685	4.225
A1Z7K9	5.58466	5.41235	5.16246	5.33902	5.31813	5.24089
A1Z7M0	5.55059	5.75673	5.4755	5.32831	5.44516	5.36942
A1Z7M8	5.00633	5.19237	5.81533	5.45352	5.38524	5.36748
A1Z7P1	5.32434	5.19809	5.16918	5.20245	5.07601	4.97329
A1Z7Q7;E2QCN3	5.11828	5.05464	4.97719	5.1205	4.76699	4.88507
A1Z7Q8;Q95SG9	4.94034	4.66134	4.65868	4.63321	4.79305	4.72984
A1Z7S3	6.2067	6.09796	6.03005	5.95505	6.03298	5.8911
A1Z7S4;Q95T49	4.80794	4.8977	4.76234	4.89649	5.07753	5.20803
A1Z7T0	4.75078	4.76398	4.74025	4.78182	4.48108	4.44109
A1Z7V9	5.91022	5.83753	5.44894	5.41107	5.73979	5.78856
A1Z7X7	5.07971	5.1543	4.91124	4.97205	4.87434	4.99963
A1Z7X8	5.19876	5.25999	5.04983	5.14555	5.1811	5.1796
A1Z7Z4;Q7K2P3	5.84427	5.8874	6.03388	5.9542	6.06852	5.90341
A1Z7Z9	4.00054	3.19742	4.16472	4.01432	3.9682	4.51828
A1Z803	5.66006	5.74194	5.57315	5.55397	5.56465	5.32604
A1Z814	4.92847	4.89766	4.87621	4.6711	4.7687	4.59907
A1Z843	5.63626	5.56929	5.57165	5.57603	5.55034	5.47384
A1Z847	5.16768	5.18038	4.99859	4.93355	5.09812	5.11958
A1Z850;E1JH26	3.9918	4.12861	3.94546	3.74239	3.97534	3.62103
A1Z871;Q966V0	4.75452	4.92343	4.86798	4.79808	4.43594	4.4649
A1Z877	5.61386	5.58602	5.42066	5.4424	5.36345	5.29785
A1Z893	5.26773	5.23428	4.39241	4.71443	4.77002	4.46728
A1Z897	4.12275	4.44916	4.31436	4.43499	4.52915	4.79389
A1Z8D0	4.98529	5.25033	5.04068	4.73197	4.78504	4.70212
A1Z8D3	5.36816	5.22921	4.82113	5.0742	4.66553	4.51804
A1Z8G0;Q8T5S9	5.19489	5.24987	5.14871	5.09989	5.08383	5.10591
A1Z8H1	3.91415	4.05291	3.79536	3.51211	3.57756	3.52087
A1Z8I8	5.87172	5.7896	5.54834	5.27143	5.68628	5.37017
A1Z8M2;A8DYA3	3.69054	3.48469	3.78889	3.63457	2.97483	2.89212
A1Z8N1	5.77792	5.77089	5.12394	5.12223	5.41946	4.91231
A1Z8P9	4.70494	4.62391	4.81583	4.73198	3.95125	3.73
A1Z8Q0	5.25307	4.68829	3.84629	3.93201	4.68399	5.40463
A1Z8R8	4.07062	4.33615	4.2931	4.10032	3.68106	3.60147
A1Z8S6	5.22417	4.94066	4.94127	4.96983	4.73078	4.52721
A1Z8U0	4.84953	4.76389	4.68342	4.7609	4.46177	4.30642
A1Z8U9	3.30318	3.28077	2.99757	3.297	3.05822	3.00195
A1Z8Y3	6.06654	6.17072	6.13203	6.01402	6.01918	5.91804
A1Z8Y4	4.73299	4.66021	4.60456	4.75834	4.59254	4.87876
A1Z8Z3	6.48596	6.69182	6.63925	6.47635	6.4215	6.27398
A1Z8Z7	5.04614	5.1715	5.18011	5.34195	5.37738	5.37188
A1Z909	4.70984	4.77502	4.85585	4.80698	4.47599	4.2507
A1Z933	5.79308	5.76773	5.84686	5.78355	5.93234	5.94667
A1Z934	5.81023	5.79356	5.81554	5.79591	5.77497	5.5836
A1Z935;A1Z936	5.07143	4.98578	4.7045	4.54576	4.71329	4.67459
A1Z968	4.65835	4.90554	4.87948	5.1024	5.14941	5.08144
A1Z977	4.77048	4.63927	4.78561	4.80004	4.74212	4.77763
A1Z979	6.60252	6.58857	6.52328	6.09728	6.14442	6.13683
A1Z992	6.19497	6.30165	5.72066	5.67035	5.82847	5.4217
A1Z9A2	5.92208	6.08683	5.96678	6.00061	5.99472	5.89552
A1Z9A8	5.92364	5.82109	6.00292	5.96389	5.8909	5.72547
A1Z9E2	4.33917	4.28672	3.79582	3.85964	3.43389	3.4093
A1Z9E3	5.95187	5.94237	5.90606	5.84342	5.58738	5.56066
A1Z9G2	4.18897	4.23101	4.05764	4.16371	3.87973	3.24471
A1Z9I0	5.15039	5.44159	5.27893	5.25808	5.22701	5.22262
A1Z9J3	4.98739	4.95841	5.08619	5.13998	4.74751	4.76594
A1Z9J6	5.50332	5.66573	5.73276	5.55564	5.40643	5.27716
A1Z9K4	3.78905	3.64304	3.42136	3.66708	3.19352	3.49681
A1Z9L9	2.84508	2.55579	2.7164	1.94676	2.61272	NA
A1Z9M2	5.24634	5.30139	5.03187	4.97204	5.4781	5.23888
A1Z9M5	3.82239	3.85778	4.11269	4.01763	3.41779	3.48882
A1Z9M6	6.1535	6.17252	6.26752	6.11613	6.12512	6.07208
A1Z9N7;A1Z9N8;A1Z9P0;B7YZE7;B7YZE8;Q56JH9	4.94227	4.77552	4.65805	4.53048	4.68662	4.73755
A1Z9U2	5.00831	4.80045	4.68982	4.55212	4.76412	4.7039
A1Z9W2	4.32922	4.20461	4.14427	3.89113	4.03279	4.20291
A1Z9X0	3.77506	3.77038	3.75077	3.69157	3.37515	3.33633
A1ZA22	4.52686	4.5554	4.23793	4.3813	3.83893	3.89597
A1ZA23	4.87744	4.7517	4.9951	4.93053	4.81634	5.14542
A1ZA47	5.14332	5.19821	5.36717	5.51082	4.37106	4.07735
A1ZA52	5.97447	5.91935	5.79031	5.70423	5.71668	5.73294
A1ZA77	4.41888	4.49342	4.41621	4.5819	4.30603	3.90319
A1ZA83	6.10285	5.94072	6.03376	5.94524	6.06318	5.92691
A1ZA97	5.97806	5.92475	6.01243	6.01249	6.31452	6.08293
A1ZAA5;Q7K221	6.13644	6.15908	5.8682	5.97005	6.20377	5.98318
A1ZAA9	4.97671	4.93763	5.03006	4.8915	4.97324	5.03301
A1ZAB5	5.47666	5.47448	5.32417	5.43335	5.24046	5.19625
A1ZAH3;Q8SX22	5.04906	4.78114	4.66402	4.65416	4.85354	4.58246
A1ZAH8;Q7JZW2	5.60934	5.78295	6.20124	6.03234	6.02459	5.7936
A1ZAI1	3.72285	3.41326	3.19848	2.93968	3.26578	3.53791
A1ZAI3	4.87339	5.0825	4.96878	4.98026	4.72717	5.03873
A1ZAI5	5.73681	5.66706	5.65156	5.48295	5.44482	5.34906
A1ZAJ2	4.73904	4.71036	4.64472	4.53094	4.51182	4.53083
A1ZAK3;A1ZAK4;Q8T0D3	4.97877	4.98516	4.97533	4.96847	4.98036	5.01025
A1ZAK7;A1ZAK8;A1ZAK9	4.67484	4.59923	4.53746	4.6224	4.46562	4.29588
A1ZAL1	4.97409	4.92977	4.28851	4.59519	5.46503	5.0918
A1ZAN2;A4UZL2;A4UZL3;B7YZI1	4.07033	3.93859	3.28398	3.56408	3.04811	3.43481
A1ZAQ9	5.22576	5.26749	5.55582	5.29477	5.09054	5.00589
A1ZAS3;Q8MQK4	5.42782	5.49537	5.33699	5.40142	5.25393	5.35897
A1ZAS8;Q9NDR1	3.85935	3.64892	3.58696	3.88128	3.52001	3.59443
A1ZAU4;Q7K5N8	5.55169	5.63188	5.86679	5.64101	5.81822	5.57859
A1ZAU8	4.81751	4.77593	4.7441	4.63367	4.60706	4.43288
A1ZAW0	5.33781	5.30566	5.1477	5.21745	5.00013	4.96428
A1ZAX1	5.78495	5.76305	5.73114	5.78363	5.57391	5.46223
A1ZAX6;A1ZAX8	3.88663	3.93123	3.36889	3.81866	3.32315	3.13194
A1ZAY4	5.21315	4.97879	4.76789	4.58707	4.81356	5.02671
A1ZAZ2	4.77626	4.66757	4.34964	4.45279	3.99682	3.93408
A1ZB23	4.33215	4.40527	4.25191	4.07269	4.19946	4.3545
A1ZB61	5.55255	5.69894	6.33691	6.11096	5.3427	4.87221
A1ZB68	6.63323	6.63986	6.41873	6.30766	6.51688	6.13087
A1ZB69	5.62773	5.61902	5.58921	5.52407	5.60657	5.55282
A1ZB70	4.98889	4.87282	4.82277	4.94493	5.28059	4.78061
A1ZB71	5.5723	5.62401	5.31785	5.30835	5.4047	5.27136
A1ZB72	6.13526	6.25455	5.87287	5.67894	6.14304	5.86788
A1ZB77	6.63353	6.76092	6.81209	6.7516	6.82311	6.64847
A1ZB79	4.97264	4.76641	4.39028	5.02667	4.67778	4.42442
A1ZB92	4.77484	4.7147	4.66861	4.66414	4.72502	4.45582
A1ZBA5	4.67601	4.81476	4.8199	4.74407	4.51496	4.77547
A1ZBB4;A8E6M1;E1JGL8	3.28332	3.23578	3.95308	3.07789	4.38667	4.2979
A1ZBC7;A1ZBC8	5.30791	5.343	5.09166	5.00637	5.37556	5.07164
A1ZBD8	3.94814	4.25021	4.35512	4.25553	4.50586	4.74312
A1ZBE8	4.48446	4.34251	4.20491	4.41856	4.24079	4.01019
A1ZBE9	4.86378	4.79293	4.76908	4.76283	4.74187	4.68963
A1ZBH1;Q7K4M9	5.4045	5.33755	5.20291	5.12611	5.03651	4.92705
A1ZBH2;A1ZBH3	4.65258	4.50734	4.41819	4.48719	4.30033	4.39028
A1ZBJ2	5.79579	5.84052	5.64509	5.61199	5.69377	5.65919
A1ZBK7	6.06036	6.11505	6.14974	6.09887	6.02733	6.02689
A1ZBL5	5.27148	5.15122	5.18984	5.24948	5.1523	5.04139
A1ZBM2	5.20877	5.28682	5.37376	5.38754	5.25766	5.22183
A1ZBQ3;A1ZBQ4	4.18432	4.41871	4.26722	4.57193	4.29112	4.48248
A1ZBR1	5.44459	5.21628	4.69193	5.14691	4.6468	4.86107
A1ZBU8	5.05791	5.8808	4.41302	4.22846	4.21576	4.48383
A1ZBW0;A1ZBW1;E1JGN7	5.7706	5.80552	5.89548	5.90351	5.69289	5.50474
A2RVG6;M9PCH6;Q29R16;Q9VUH1	4.61357	4.6288	4.60369	4.64736	4.79448	4.78912
A2RVI0;Q7K076	5.41708	5.53353	5.49549	5.52482	5.30374	5.05611
A2VEG3;M9PDK6;M9PDX3;Q9VID5	4.41794	4.30309	4.17418	4.31427	4.05028	4.23426
A2VEI2	5.66738	5.59066	5.66092	5.44393	5.40446	5.43306
A4V0U4;Q9VJ39	5.36535	5.36213	5.40035	5.39788	5.48965	5.40401
A4V0X6	3.89845	4.0502	3.64867	3.93854	3.69188	3.81482
A4V110;Q7JMV3	5.25971	5.24354	4.95172	4.95041	5.00566	4.80096
A4V134	3.66229	3.53882	3.32335	2.89162	3.07251	3.15997
A4V2A4	6.17739	6.10043	6.24737	6.34947	6.13515	6.12313
A4V2C3;Q5LJP6	3.88602	3.74573	4.0552	3.59431	3.76322	3.16833
A4V362;B7Z0N3;Q8T0M8	5.0252	4.70243	4.69823	4.64487	4.76295	4.72934
A4V4F2;M9PJN2	4.9673	4.92723	4.69928	4.50704	4.97554	5.44179
A4V4U5	6.72167	6.49825	6.193	6.31854	6.37026	6.58274
A4V4V2;Q8MRC7;Q9TW27;Q9U4F5;Q9W5S7	5.68478	5.54537	5.62261	5.5396	5.3672	4.96037
A4VCL2	4.65094	4.29779	4.73538	4.03592	4.46059	4.27882
A8DQW8	7.33045	7.19784	7.30436	7.51021	7.68152	7.30727
A8DRW0	6.15099	6.46251	6.30527	6.28357	6.36197	6.33142
A8DY43	3.8343	3.72934	3.70136	3.57158	3.46684	3.44835
A8DY49	3.70672	4.10762	4.53832	4.42404	4.35986	4.09385
A8DY80;A8DY81;E2QCN4	5.11289	5.01645	4.99801	5.11022	4.73842	4.75312
A8DY95	5.18377	5.04309	4.9632	5.04466	4.97868	4.97655
A8DYB7	4.23798	3.9279	4.08232	4.0568	3.46757	3.63071
A8DYC5	6.82441	6.8678	6.84192	6.72111	6.82942	6.56078
A8DYH1	6.27679	6.25431	6.37852	6.15481	5.87081	5.9555
A8DYH2	6.62832	6.83471	6.94689	6.64486	6.85784	6.53928
A8DYI6	6.53063	6.58364	6.43847	6.36151	6.30882	6.27738
A8DYJ6;A8DYJ7;B7YZM1;Q8MYS2	5.04407	5.12783	5.00745	4.87769	5.34299	5.30442
A8DYL2	5.12759	5.11855	5.26822	4.99151	5.19765	5.15579
A8DYP0	4.82369	4.8317	5.09356	4.98508	4.58533	4.52813
A8DYS6	5.51705	5.20289	4.89731	5.088	4.99957	5.28752
A8DYT6	4.90774	4.86486	4.84157	4.81747	4.67269	4.45321
A8DYW2;M9PCQ7	4.07991	4.27144	4.45608	4.13654	4.44852	4.15152
A8DYW5;B7Z029;D5SHT8;M9PB53;Q8IPJ4;Q9VM99	5.79171	5.76506	5.55076	5.5305	5.57986	5.5867
A8DZ06;X2J9Z3	5.36376	5.23353	5.08103	4.97224	5.26528	5.30264
A8DZ09;M9PBC6;M9PG25;Q9VJI6;X2JED0	5.4967	5.21085	5.03703	5.22268	5.23492	5.0927
A8DZ19;A8DZ20;C3KGL5;M9PBE8;M9PGB1;Q9VIN1	4.54824	4.46012	4.53065	4.31085	4.2625	4.26949
A8DZ29;O61380	5.21987	5.15772	5.15798	5.16638	4.94654	4.84578
A8E6R2;Q9VNR7	5.23435	5.19204	4.95095	4.93462	4.64063	4.60369
A8JNK1;M9PE93;M9PHB1	5.53438	5.50806	5.58605	5.56547	5.46209	5.36545
A8JNK4;M9ND42;M9ND44;M9NDH6;M9NE16;M9NF07;M9NF10;M9PBP3;M9PE52;Q9VZD7	4.14081	4.23142	4.39216	4.28262	4.13781	4.16297
A8JNN5;Q9VSI2	3.1858	3.60102	3.07195	2.70752	2.94076	2.9273
A8JNP2	7.05181	6.91323	6.67952	6.68803	7.13485	7.13758
A8JNQ0	5.1856	5.10322	5.09595	4.85032	5.02534	4.80315
A8JNQ4;M9NFQ7	4.16051	3.94382	3.85534	3.77481	3.54551	3.23995
A8JNS4;M9PCD9;Q9VU81;Q9VU82;Q9VU83	4.44657	4.45388	4.44797	4.3408	4.13685	4.09124
A8JNT1	6.20512	6.16293	6.11318	5.75495	6.11414	6.0972
A8JNT7	4.68145	4.70957	4.81234	4.55693	4.53287	4.29694
A8JNU6	6.80481	6.83631	6.69828	6.60154	6.65139	6.6187
A8JNX0;M9PG88;M9PGG0;M9PIL3;Q9VNS2	5.66482	5.69331	5.658	5.7421	5.45388	5.4292
A8JQS3	5.03186	5.49539	5.38297	5.33605	5.30251	5.50336
A8JQT5	4.5293	4.66763	4.97385	4.55204	4.00907	4.07848
A8JQV2	4.73446	4.73213	4.38286	4.43264	4.4175	4.29053
A8JQV3	5.37232	5.36405	5.3123	5.22261	5.35962	5.36181
A8JQV7	4.22928	4.39651	4.99039	4.85584	3.78898	3.69423
A8JQX3	4.86722	4.54626	4.47005	4.42057	4.47476	4.48823
A8JQY2;Q9VGF8	4.92811	4.57777	4.83849	4.84962	4.86982	4.74034
A8JR25	3.9361	3.61858	3.49819	3.37355	3.9953	3.77467
A8JR35;Q7KSE9;Q9VEJ5	3.86177	4.09971	3.77586	4.07639	3.87323	3.83035
A8JR57;Q9VDH1	4.46159	4.30275	4.16443	4.42997	4.21746	4.11904
A8JR71;A8JR72	5.8979	5.85908	5.84193	5.61128	5.7109	5.72288
A8JTM7	5.0624	4.99049	5.07232	4.90936	5.13925	5.1225
A8JUU1;M9PHF1;X2JEY9;X2JJP5	5.05018	5.01353	4.89157	4.84555	4.62352	4.67355
A8JUZ6;Q9W426;X2JAM0;X2JCR6	6.38104	6.31561	6.31552	6.17284	5.60497	5.42816
A8JUZ7	5.07456	4.89226	5.03237	4.91092	4.90117	4.98254
A8JUZ8;E2QD99;M9MS17;M9PDW8;M9PGT0;M9PH82;M9PJ82;X2JEC4	4.271	4.30857	4.40093	4.25376	3.98344	4.00531
A8JV09;D6W4T8	5.04188	5.10927	5.04816	4.98281	4.83501	4.90464
A8JV22;Q9W3F6;X2JEJ0	5.41997	5.41534	5.38738	5.40717	5.42131	5.37759
A8JV25;Q9VXA5	5.52795	5.44033	5.24769	5.16531	5.39877	5.50579
A8QI34	5.2735	5.39781	4.97558	5.13532	5.23044	5.2959
A8WH76	6.90889	6.80672	6.67052	6.61065	6.79384	6.59939
A8Y4V5	5.25294	5.21536	5.31591	5.18937	5.47507	5.41549
A8Y535	4.45863	4.5901	4.44343	4.20685	4.22588	4.02767
A8Y582;Q7PLP4;Q7PLP5	4.70155	4.69154	4.89463	5.0151	4.50543	4.63112
A8Y589	6.07936	6.01628	5.82072	5.87661	5.88623	5.71173
A8Y596;A8Y599;A8Y5A0;Q7PLC6;Q7PLC7	4.45966	4.17123	4.6449	4.81321	3.89639	4.10285
B5A5T4	5.39396	5.39714	5.58325	5.3611	5.19686	5.32045
B5X533;Q9VXM0	4.8238	4.78265	4.36499	4.47656	4.67033	4.30483
B7YZK5	5.32344	5.08491	5.03454	4.94525	5.25511	4.78734
B7YZL1;B7YZL5;B7YZL6;B7YZL7;Q0E919;Q7YTZ4	4.95967	4.84873	4.90506	4.77889	4.5787	4.57909
B7YZN4	4.52529	4.59242	4.5527	4.48981	4.59013	4.55879
B7YZQ1;Q9W179	5.57834	5.39578	5.566	5.47518	5.37705	5.49539
B7YZQ3	5.93632	5.7359	5.47248	5.48215	5.59265	5.29589
B7YZT2	4.88706	4.82485	4.58127	4.53699	4.70183	4.47299
B7YZU1;Q7K3V9	5.52098	5.66023	5.56795	5.42757	5.56728	5.43218
B7YZV4	4.88199	4.84565	4.65013	4.71968	4.80283	4.72188
B7YZW3	4.85128	4.69567	4.68925	4.88888	4.32727	4.42233
B7YZX0;Q8INW2	5.01437	5.0897	5.29201	5.22356	5.09995	5.12131
B7YZX9;M9PD98;Q9VIM1	5.20819	5.15118	5.23425	5.05765	5.0505	5.09453
B7YZZ0	5.36656	5.21567	5.15702	5.29213	5.22355	4.91745
B7Z001;Q9VQL7	6.98537	7.01586	6.23814	6.30314	6.4524	5.63074
B7Z002;M9NCY5;M9NDB7;M9NEL3;Q9VPL9	4.53023	4.51674	4.49002	4.51925	4.1371	4.05942
B7Z005;E1JHR0;Q9VPU3	4.52684	4.66238	4.593	4.37621	4.01564	3.98953
B7Z028;Q9VMD7	4.89713	4.83774	4.89916	5.05867	4.86693	4.80278
B7Z061;Q8IQN8	3.49748	3.49938	4.3347	3.65551	3.51747	3.635
B7Z0B2	2.94009	3.08174	2.64869	3.27797	2.93589	2.79671
B7Z0B9	4.56625	4.76463	4.74223	4.61512	4.28949	4.29343
B7Z0C9	4.99649	4.91006	4.61603	4.46455	4.71822	4.65321
B7Z0D9;M9PHS6;Q0E8G9	5.96373	6.16823	7.35224	6.58367	6.10256	5.84338
B7Z0E0;Q7KUB1	7.36399	7.44645	7.24777	7.25123	7.23133	7.14533
B7Z0E2	5.24866	5.05687	5.16305	5.1748	5.03634	4.91013
B7Z0K8	4.30494	4.28954	4.14154	4.34493	4.48257	4.50924
B7Z0L0;B7Z0L1	5.16664	5.25378	5.89858	5.80081	5.73305	5.63142
B7Z0M9;Q7KSB3	5.09498	5.01628	4.80095	4.76632	4.63571	4.59663
B7Z0Q1	4.85231	4.75952	4.63201	4.44436	4.53465	4.41751
B7Z0S9;Q8SXQ9	4.5416	4.47425	4.37463	4.38513	4.72781	4.57594
B7Z0W3;E1JJ71;Q9VI21	6.1761	6.05925	5.83	6.1302	5.82818	5.87167
B7Z0W9	4.68879	4.45373	3.97791	4.10483	4.68085	4.52501
B7Z0X1;Q9W457	6.17857	6.19518	5.86772	5.9376	5.98686	5.74482
B7Z0Z7;M9PHX1;Q8IR04;Q9VX90;X2JFI2;X2JKT7	5.31096	5.24511	5.25917	5.04882	5.25593	5.36294
B7Z100;B7Z103	2.51216	2.40965	2.97414	2.92284	3.61031	3.10293
B7Z107	6.23475	6.38274	6.32062	6.20333	6.0333	6.01935
B7Z122	5.8609	5.57423	5.2521	5.35085	5.43822	5.59251
B7Z138;Q8IRL5;Q9W2X2;X2JB32;X2JD61;X2JEC6;X2JEP7;X2JJ95	3.38075	3.81056	3.69188	3.61463	3.1235	3.55869
C0HDP4;Q9I7M6	4.79883	4.59871	4.87804	4.86619	4.72516	4.9225
C0HK92	4.97635	5.12108	5.86566	5.73171	4.90359	5.04896
C0HK94	4.09861	3.77102	4.16851	4.48567	4.14199	4.22145
C0HK95	3.75979	3.86731	4.42465	4.54751	4.57805	4.88097
C0HKA0;C0HKA1	6.0614	6.23536	6.59651	6.5043	6.58413	6.38464
C0HL66;C0HL67;P02299	7.07728	7.33591	7.45916	7.24818	6.25014	6.40112
C0HLZ9;C0HM00	5.11844	5.25911	4.93551	4.71257	4.85496	4.70786
C0PDF4;M9PEW1;Q9I7R0	6.38642	6.39611	6.23753	6.17966	6.34367	6.32879
C0PVB3;Q7KUU5	4.84015	5.01446	4.81684	4.43689	4.65864	4.67189
C4NYP8;Q86DS1	6.1055	6.10263	6.179	6.16823	6.12132	6.13979
C6SV41;Q9VL49;Q9VL50;X2J9A4	5.26199	5.38192	5.01055	4.94999	5.07547	4.8889
C9QPE7;Q9VM19	5.42966	5.45163	5.03856	5.05436	5.37867	4.64237
D0IQJ8;M9PG83	6.15715	6.07382	5.4691	5.21384	5.83967	5.82948
D0IQK3	4.64815	4.42581	4.2595	4.05499	4.15632	4.09278
D0UGE6	4.66495	4.77961	4.9731	4.68406	4.7485	4.90295
D0Z756;Q7K2X5	5.62786	5.48463	5.36713	5.24221	5.5705	5.52436
D1YSG0	5.50924	5.49401	5.70121	5.66945	5.5762	5.53199
D3DML3;M9NEC0;M9PF42;Q9VLT9	5.86131	5.90667	5.77607	5.77468	5.70382	5.71532
D3DMM0;Q2PDT4;Q8INW7;Q9VIX2;Q9VIX3	5.01243	5.01625	5.6029	5.53339	4.84831	4.84804
D3DMM4;Q86B94;Q86B95;Q86B96;Q86B97;Q9VGE9;Q9VGF0	5.38527	5.46394	5.3874	5.20854	5.11776	5.38507
D3DMP0	6.03196	6.08266	6.41928	6.27025	5.97629	6.22421
D5A7R5;Q9VXR8	5.44011	5.31548	5.28768	5.3447	5.29376	5.25654
D5AEK7;Q9VV51	5.5578	5.43422	5.27187	5.18081	5.21855	5.12439
D5AEP3;Q0E910	5.06109	4.7395	4.64107	4.85988	4.64082	4.56369
D5SHN1;Q86BQ3;Q8IGQ3	5.24201	5.17739	4.87735	4.77888	4.97923	4.6547
E1JGK8	4.8959	5.15551	5.07534	4.9485	4.40282	4.19876
E1JGY6;Q9V9A9	5.05102	5.03557	5.26166	5.03954	4.76702	4.7738
E1JGY7	6.1398	6.29228	6.56903	6.41685	6.20879	6.20273
E1JH55;Q7KY01	4.43728	4.57765	4.2269	4.27261	4.18847	3.96184
E1JHA6;Q9VM55	5.37372	5.36508	5.64977	5.52511	5.40694	5.45775
E1JHE1;Q9VKW4	4.96632	5.35853	4.92295	4.96436	5.30419	5.11258
E1JHE4;Q9VKU1	5.5854	5.48626	5.56199	5.57375	5.44226	5.41551
E1JHH0;M9ND82;Q8IP74	4.68443	4.65232	4.78077	4.80624	4.8284	4.84029
E1JHJ3	0.581746	1.15895	4.75476	4.38896	4.56466	5.0753
E1JHM5;Q9I7L8	4.1324	4.22575	4.18791	4.02254	4.23052	4.13763
E1JHN2;Q9VIF3	6.49088	6.61174	6.53314	6.58713	6.66634	6.54469
E1JHP3;Q0E8N3;Q9V9Q7;Q9V9Q9;X2JAM1;X2JEX4	4.57286	4.46192	4.59891	4.65434	4.34893	4.34399
E1JHP9;Q9VPI6	5.11148	5.07853	5.0789	4.95005	5.01508	5.03395
E1JHQ6;Q9VPS6	4.61427	4.34317	4.09476	3.96961	4.29473	4.51947
E1JHT6	6.57064	6.57454	6.4108	6.3994	6.44724	6.35627
E1JI40;Q9VW31	4.8002	4.72879	5.17524	5.15731	4.79585	4.9008
E1JI59;Q6U9V3;Q7KTX2;Q9VP80	4.61646	4.62322	4.40634	4.448	3.95812	4.10402
E1JI78;M9ND66	5.83221	5.70625	5.93714	5.92306	5.92843	5.67507
E1JI91;Q9VSW1	6.52987	6.58758	5.96614	6.05776	6.0919	5.59689
E1JIH1	4.62416	4.43469	4.36233	4.27937	4.22051	4.07701
E1JIJ4	NA	NA	NA	3.57826	3.66477	4.17318
E1JIQ5	5.97598	5.89842	6.13496	6.00503	5.76149	5.78134
E1JIR1;Q9VDK6	4.86673	4.89779	4.92155	4.57632	4.46965	4.18274
E1JIR4	8.96633	8.77086	8.68655	8.63041	8.97944	9.05671
E1JIS1;Q0KI33	4.88069	4.87693	4.63811	4.66539	4.55387	4.54856
E1JJA4;E1JJA5	5.13786	5.27437	5.57332	5.43065	5.37059	5.66823
E1JJE6	4.7801	4.83995	4.87589	4.69208	4.87874	4.34515
E1JJH5	5.36533	5.04899	4.92811	4.67943	4.52233	4.5553
E1JJN0	4.40054	3.81463	4.03759	4.08168	4.29791	4.14877
E1JJR3;Q9VWI1	4.49997	4.50196	4.62737	4.33838	4.47749	4.1994
E1JJS1;Q9VRA4	5.46977	5.44135	5.37105	5.58324	5.24877	5.3132
E1NZB4;Q9VYI0	5.59728	5.61466	5.68531	5.70904	5.67068	5.66221
E2QCF1	5.05319	5.00705	4.7863	5.02922	4.75119	4.64337
E2QCN9	6.20745	6.26561	5.66998	5.67326	5.62402	5.67508
E2QCS8;M9PE28;Q9VQ76	4.35673	4.33351	3.87935	4.24793	3.59865	3.178
E2QCY2;M9PCX4;Q9VVT8	5.66923	5.72922	5.66269	5.63605	5.68118	5.499
E2QCZ0	6.81334	6.86092	6.72097	6.66383	6.09916	6.29487
E2QD26	5.89372	5.84929	5.77029	5.77724	5.75098	5.90322
E2QD66;Q0KHQ2;X2JG15	5.0775	5.0276	5.00955	4.86588	4.83124	4.64763
E8NH67;Q9W5X1	4.61665	4.52149	4.44424	4.27319	3.87613	3.75005
E8NHA2;Q9W0H2	5.33721	5.35294	5.14881	5.24988	4.71597	4.4877
F0JAF7;Q9W5X0	6.04132	5.97494	6.08438	6.00498	5.9771	5.92532
F0JAP7;Q9W3F3	4.03234	4.23607	4.18072	3.7292	4.4567	4.14324
F0JAQ9;M9PF27;M9PFH0;Q95SE8;Q9VU19	7.4991	7.4393	6.93086	6.98808	7.00698	6.777
F2FB81;H5V8D0;X2J5L4	5.7576	5.64119	5.62212	5.67465	5.68929	5.61288
F3YDF1	5.49788	5.30321	5.31945	5.1866	5.2592	5.05916
F3YDK4	5.34987	5.23095	5.15673	5.10368	4.67384	4.64183
F9VMG5	6.39944	6.39634	6.51877	6.55845	6.15326	6.21455
G2J5Z0	6.09122	6.26676	5.89173	5.7085	6.04116	5.77437
G3JX32	3.67129	3.43746	3.20602	3.60966	NA	NA
H8F4T3;Q9VFG5	6.2844	6.39121	5.90926	5.92609	6.08606	5.77247
H9XVP2;Q8IM86	4.18076	3.95482	4.1142	3.83682	3.56354	3.63571
H9XVP3;Q9V491	5.29617	5.24178	5.15455	5.0816	5.15939	5.21046
L0MLM5;Q8SX35	5.53469	5.20998	5.23345	5.22799	5.14763	5.34003
L0MPN7;L0MPX5;Q9V4D6	5.46934	5.47039	5.26946	5.2993	5.16978	5.16495
L0MPZ1	6.20003	6.1992	5.86615	5.73832	5.45436	5.42189
M9MRD1	4.89394	4.83057	4.88819	4.90253	4.49844	4.32552
M9MRI4	4.39714	4.55894	4.8392	4.5136	4.52593	4.27722
M9MRJ4;M9MSG3	4.652	4.61602	4.66541	4.71086	4.4459	4.36799
M9MRM3;M9PCU5;Q9VKT9	4.29881	4.13443	3.98957	3.92623	3.92861	3.88755
M9MRV7;Q9VZG5	4.9924	4.89493	4.64827	4.90705	5.00817	4.84813
M9MRX0	5.39606	5.45731	5.58639	5.445	4.79203	4.76264
M9MRX4	5.12768	5.04604	4.97021	4.94801	5.02742	5.01172
M9MS72	5.69191	5.59705	5.82626	5.86597	5.30813	5.24818
M9MSG8	4.8262	4.7247	4.58103	4.62588	4.75335	4.71253
M9MSI3;Q9V3G8	5.28304	4.98892	4.35895	4.53518	3.64257	4.26753
M9MSK4	3.63674	3.52159	3.05854	2.85539	3.10334	3.01755
M9MSL3;Q9VUC1	6.00883	6.01604	5.91299	5.90051	5.87603	5.89927
M9MSM5;Q7YZA4;Q8IRY0	5.05607	4.95128	4.73036	4.8795	4.74995	4.68723
M9NCP5;Q9VPY9	3.96385	4.34881	4.40884	4.49769	3.68784	3.86815
M9NCQ1;Q9VQ52	5.06566	5.1273	4.98525	4.84713	5.16338	4.8254
M9NCS7;M9NEC3;M9PB71;M9PB72;Q7KTI5	4.08794	4.01346	4.11125	4.21219	3.71457	3.53104
M9NCX5;M9NE36;Q0E8V4;Q9VPI3;Q9VPI4	4.82502	4.93071	4.89131	4.87918	4.67105	4.85932
M9ND25;M9NDF0;Q59E18	5.53763	5.58905	5.45008	5.26959	5.31208	5.30127
M9ND31	5.12482	5.29715	4.73473	4.81737	5.12443	4.97806
M9ND57;M9PBU3;M9PHN9;Q9VS83	4.564	4.56361	4.64645	4.66498	4.57208	4.53555
M9ND79	4.89827	4.91804	5.0523	4.96674	5.07873	5.26228
M9ND89;M9NDQ8;M9NE94;M9NFB1;M9NFB8;Q6NN29;Q7KUK1;Q8T0E0;Q9VUD7	4.19144	4.35803	4.23904	4.66409	4.1746	4.32423
M9ND93;M9NFV3;M9PCJ5;M9PCK2;M9PFA3;M9PFA8;M9PFJ2;M9PFP0;M9PFP4;M9PI63;Q400N2	3.79522	4.4765	4.56925	3.98326	3.77055	3.82948
M9ND95	6.85767	6.94399	7.03157	6.87079	6.7571	6.80296
M9NDA1;M9NEB2;M9PCQ3;Q8IQN4;Q8MV37	3.4526	3.22031	3.0111	3.06523	2.95914	2.96563
M9NDE0;Q8I0S6;Q9NHN2;Q9VPG4;Q9VPG5	4.85548	4.77572	4.99851	4.86221	4.76019	4.76607
M9NDE3	4.64671	4.57889	4.6622	4.4621	4.92434	4.98692
M9NDE4;Q9W0L8	NA	4.65612	4.31303	NA	4.28604	NA
M9NDG8;Q9VM80	5.5299	5.45609	5.30816	5.34818	5.0767	4.51786
M9NDI3;Q9VLQ9	5.68322	5.74313	5.70557	5.67784	5.65183	5.52848
M9NDL7;Q8MQS4	4.67123	4.66535	4.51482	4.5163	4.33689	4.36135
M9NDP0;M9PBA9;M9PCU7;Q9VK42	3.23877	2.95125	3.12354	2.84707	2.47587	2.14796
M9NDS9	4.97476	5.05358	5.26635	5.25583	5.07712	4.78741
M9NDV5;M9NFF0;Q8SYF7	5.86896	5.79256	5.70076	5.67961	5.76334	5.6809
M9NDX8	3.81923	3.44207	3.7274	3.55996	3.6217	3.87484
M9NE98;Q9VUI8	4.92191	4.95546	4.64366	4.82534	4.34917	4.46777
M9NEF2;M9PHQ2;M9PJM2;Q59E49;Q8IR69;Q9VYF3	4.30304	4.23021	4.35531	4.08061	4.04461	3.88732
M9NEP1	6.43731	6.31002	6.17897	6.29246	6.02734	5.7382
M9NEW0	5.54357	5.42458	5.50534	5.39288	5.309	5.14399
M9NEX3;Q8IRR0;Q8SY77	5.65829	5.58383	5.31227	5.39364	5.54087	5.52645
M9NEZ2;M9NG38	5.54251	5.41605	5.18779	5.14661	5.13988	5.1161
M9NF03;Q9W2Z6	4.31851	4.45682	4.81893	4.46721	4.56541	4.71565
M9NF14	5.67656	5.63223	5.64582	5.68781	5.36949	5.3054
M9NF32;Q9V3K7	4.39158	4.4054	4.47976	4.26343	4.26315	4.05943
M9NF46	7.65838	7.66238	7.67495	7.66374	7.28777	7.14769
M9NF47;M9NFP8;M9PHT9	4.41823	4.34146	4.55708	4.26529	4.20717	4.27849
M9NFC0	5.4904	5.44961	5.63491	5.6337	5.57406	5.76735
M9NFH3	4.38763	4.04956	4.10447	3.73752	4.18217	4.3394
M9NFH4;X2JEI9	3.64075	3.3903	3.62532	3.42062	3.26004	3.72409
M9NFH8	7.25799	7.07944	7.10608	6.98955	7.19305	7.1928
M9NFR5;Q95RE4	5.61322	5.62315	5.73338	5.69365	5.51062	5.43035
M9NGD9	5.21744	5.16382	5.29961	5.11819	5.48393	5.45908
M9NGF7;M9PJN5;Q86NK9;Q8IR37;Q8IR38	5.31758	5.36108	4.97648	5.01548	5.18838	4.87838
M9NGX5;Q9W2Z7	4.66978	4.70583	4.94957	4.43291	4.50994	4.43856
M9NGY7	5.13211	4.95836	4.74194	4.80991	4.97206	4.98199
M9NH07	5.90262	5.88489	6.00394	5.92155	6.03445	5.92704
M9NH88;M9PJQ5	3.96563	4.23527	5.76063	5.57206	5.79667	6.09103
M9PAY6;M9PDS0;Q9VPM7	5.00065	4.84807	4.64545	4.85147	4.66278	4.57896
M9PAZ4;Q59E11;Q9VPV8	4.93607	4.84391	4.9682	4.84973	4.88163	4.89714
M9PB01;Q0E8U7	4.43371	4.42722	4.3189	4.37296	4.00171	4.10284
M9PB30;M9PBZ0;M9PC41;M9PCJ6	3.66571	3.69461	4.31371	3.73212	3.69564	3.69702
M9PB37;M9PC65;M9PEM2;Q8IPL3	5.12628	5.07226	4.96498	4.93126	4.71205	4.7668
M9PB59;Q8IPI3	5.63552	5.34424	5.15578	5.19159	5.42938	5.41949
M9PBA3	5.91759	5.9837	6.74791	6.15609	5.21547	5.04593
M9PBA6;Q9VK90	4.50952	4.72583	4.9982	4.78685	4.81196	4.9301
M9PBE1;Q9VIV0	3.51407	3.356	3.38751	2.96257	2.92591	2.77931
M9PBF6;Q1WWC9;Q9VIF7	5.42677	5.40482	5.30815	5.35313	5.46574	5.44036
M9PBJ1;M9PE03;Q0E8J3	3.85507	3.93265	4.47724	4.27876	3.88147	3.97615
M9PBM3;Q9VPW2	4.63037	4.54607	4.6498	4.5014	4.34961	4.19661
M9PBN2;Q8SXR1	5.5599	5.60063	5.67434	5.66469	5.55629	5.70426
M9PBU4;Q9VQG1	4.76801	4.78762	4.53898	4.3619	4.64173	4.35548
M9PBU6;M9PEF2;Q9VS85	5.17953	5.07838	5.16842	5.00127	5.13682	4.99447
M9PBV2;Q9VQI8	5.86231	5.773	5.35794	5.45881	5.50963	5.44706
M9PBW9;Q9VSL8	4.99815	4.97981	5.00746	5.04928	4.65155	4.62269
M9PBX3;Q9VQF1	4.29258	4.12316	3.76142	3.75465	3.59607	3.78807
M9PBY3;M9PEK7;M9PEU6;M9PF18;M9PHU7	5.14082	5.03151	4.68674	4.65226	4.25585	4.56444
M9PBZ2;Q24474	6.04021	6.00748	6.18954	6.18023	6.10536	5.95637
M9PC24;M9PER0;M9PF57;Q7KUD8;Q867T3;Q8IGP1	5.16755	5.17284	5.54238	5.54143	5.05947	5.11994
M9PC43	5.71343	5.63512	4.69334	4.73276	4.98885	4.74954
M9PC64;M9PF47;M9PI07;Q0E8F8;Q8IQE9	5.52422	5.48922	5.52653	5.50187	5.2838	5.25442
M9PC73;M9PCD4;M9PCR7;Q9VM93	4.8215	4.70348	4.68673	4.57225	4.23598	4.27326
M9PC74;Q7K1W8	5.11369	4.92027	5.01739	4.97118	4.6079	5.04475
M9PC99;Q9VQ94	5.55226	5.56234	5.40065	5.47228	5.54061	5.40562
M9PCA6;Q9VMJ5	5.57858	5.61054	6.06034	5.91499	5.84613	6.00045
M9PCA7;M9PI37;Q9VTW8	5.0983	5.04573	4.9265	4.8461	5.03995	5.07334
M9PCE3;Q9VM67	5.47883	5.32398	5.27484	5.46414	5.15718	5.06725
M9PCE5;Q9VU94	5.07383	5.13588	5.43562	5.31535	5.13811	5.23584
M9PCE7;M9PCT0;M9PEZ6;Q0E8S5	5.79425	5.80602	5.27599	5.32463	5.51793	5.26594
M9PCG1;Q9VM14	6.15827	6.21649	6.22297	6.10126	6.10735	6.03637
M9PCI6	4.52336	4.46926	4.47865	4.51558	4.65276	4.7079
M9PCP3;Q9VMK9	4.80029	5.06321	4.80616	4.76555	4.81899	4.56214
M9PCU0	6.89564	6.861	6.89167	6.79465	6.58221	6.65328
M9PCX0	4.79392	4.63685	4.62482	4.40441	4.67534	4.39966
M9PCX9;Q7KT76;Q9V416;X2J9Y1;X2JE80	4.92656	4.98283	4.93589	4.70095	4.78184	4.57638
M9PD08;Q9VK85	5.50486	5.56458	5.41791	5.28171	5.32902	5.16612
M9PD23;Q9VK35	4.11078	4.15309	3.90533	3.8166	3.90822	3.94949
M9PD73;Q9VIT9	5.4368	5.50438	5.50857	5.29653	5.2988	5.22707
M9PD88;Q95RR1	4.81784	4.83769	4.77869	4.65043	4.71694	4.39562
M9PDB4	5.98704	6.28093	6.22264	6.11617	5.64159	5.52869
M9PDE6;M9PDY6;Q9V9N5;R9PY70	4.37374	4.18134	4.31728	4.34418	4.2173	4.08516
M9PDE7	4.5636	4.92258	4.83256	4.78199	4.65814	4.92999
M9PDG9;O46100	4.77788	4.82141	4.77172	4.7896	5.10203	4.84602
M9PDI9;M9PDV9	4.36622	4.08485	4.20996	4.7004	4.1286	3.96572
M9PDJ9;Q8IP18;Q9V3W1	4.86108	4.744	4.89463	4.89234	4.58051	4.49129
M9PDK3;Q9W0L7	5.23847	5.07204	5.04833	5.03374	4.86119	4.56808
M9PDL0;O46052	4.79987	4.57413	4.61192	4.53162	4.73677	4.37664
M9PDL2;Q9VJH2	5.51495	5.4555	5.44057	5.44099	5.09069	5.09264
M9PDM4;Q9W4X4	5.11347	5.00005	4.87832	4.76283	4.89143	4.95195
M9PDT6	5.87816	6.25224	6.0822	6.82716	6.14072	6.01269
M9PDU4	5.84562	5.88889	5.81641	5.59397	5.63318	5.56191
M9PDV2;Q9W441	7.69122	7.65453	7.61376	7.50301	7.87235	7.81701
M9PDV6;M9PE32	5.14251	5.03705	5.03425	5.064	5.03007	5.02133
M9PDX2	4.80678	4.63542	4.82669	4.72768	4.72537	4.7568
M9PDX8	7.29479	7.24416	6.79959	6.73482	7.07365	7.06747
M9PE19;Q7KV94	5.93047	5.75922	5.80525	5.86953	5.92782	5.05919
M9PE35;Q9W0N7	4.92438	4.82414	4.89458	4.79644	4.81294	4.90411
M9PE65	4.7719	4.68279	4.42047	4.23877	4.48799	4.55775
M9PE74;Q9W2U7	4.73662	4.63741	4.66392	4.75805	4.50146	4.43399
M9PEA7;M9PER3;Q9VRT9	4.04349	4.4109	4.15716	4.69754	3.78654	3.64845
M9PEB1;M9PEH8;Q9VRV1	4.32426	4.36224	4.31338	4.38028	3.95362	3.94463
M9PEC1;M9PEJ2;M9PES8;M9PHL4;Q9VRY6	5.58507	5.54165	5.43235	5.37	5.16123	5.13514
M9PEE1;P91638;Q7KU82;Q9VS62	5.29079	5.18139	5.19555	5.23355	4.97074	5.07931
M9PEG1	5.69064	5.64911	5.65107	5.50396	4.95549	5.22655
M9PEJ9;Q9VSM4	4.85088	4.82994	4.93749	4.81719	4.63376	4.74189
M9PEL3;Q9VS54	5.30217	5.2316	5.20594	5.16671	5.05999	5.03235
M9PEL6;Q24173	4.96651	4.87211	4.53594	4.53408	4.59568	4.65349
M9PEM1;Q9VZC9	5.58761	5.56997	5.58169	5.41514	5.4365	5.22108
M9PEP5;M9PEY1;M9PF46;M9PHW7;Q9VT32;Q9VT33	6.00336	6.0296	5.72737	5.8016	5.72556	5.70018
M9PEQ4;Q7KUD6;Q7KUD7;Q8IQD4;Q8IQD5;Q8IQD6;Q9VT48	3.80813	3.99555	3.5148	3.51774	3.89505	3.859
M9PET3;M9PF79;Q0E8G1;Q960V1	4.60952	4.41674	4.73641	4.59001	3.86499	4.11788
M9PEX7;Q9VT05	4.90195	4.75999	5.06008	4.87009	4.87173	4.86277
M9PEY7	5.25544	5.24474	5.16981	5.2038	5.0934	5.13345
M9PF14;M9PF20;M9PFF9;M9PFG3	4.31918	4.52824	4.15911	4.28152	4.0009	4.18121
M9PF16	7.22655	7.16189	7.5002	7.4135	7.0995	7.2243
M9PF28;Q7KUE6	3.89287	3.8811	4.38584	4.07694	3.58416	4.0018
M9PF36	5.77531	5.75277	5.8442	5.76731	5.85975	5.76729
M9PF61	6.86551	6.98445	6.55517	6.63133	6.55506	6.34493
M9PF85;Q7JVP2	4.41745	4.36451	4.21142	4.38736	3.73984	3.83862
M9PF96;Q9VWC8	5.05978	4.91766	4.86624	4.86171	4.50818	4.25355
M9PFE5;M9PFI2;Q961X4;Q9VU76	5.0561	5.29726	5.47561	5.21574	4.83475	4.60775
M9PFF1;Q9VTX5	5.37882	5.42929	5.32718	5.10134	5.01457	4.96217
M9PFN0	5.59491	5.57533	5.48411	5.46918	5.47504	5.33607
M9PFQ2;Q0E8R1;Q8SXD5	5.04477	4.99616	4.77925	4.75928	4.28693	4.65867
M9PFR6;Q9XZ03	4.13078	4.18741	4.09993	4.14247	4.3106	4.02038
M9PFR8;Q9VV82	4.72049	4.56958	4.47571	4.62272	4.48043	4.39064
M9PFV8;Q9Y102	4.55688	4.77369	4.50321	4.65528	4.59415	4.51253
M9PFX4;Q9VW05	3.73888	3.177	2.87082	2.92032	2.93066	3.10491
M9PFY4;Q8WR19;Q9VW45	5.77159	5.80228	5.76343	5.63619	5.63477	5.70693
M9PFZ1;Q9VNX6	4.4278	4.43285	4.54996	4.36104	4.7486	4.51129
M9PG20;M9PG82;M9PID3;Q9VPB0	4.43072	4.15225	3.83369	3.99435	3.2483	3.42629
M9PG40;Q8SYG3	6.0261	6.099	5.84298	5.95096	5.78068	5.6962
M9PG87;Q9VPA1	5.24569	5.21784	5.45674	5.28563	5.45176	5.32619
M9PGA7	NA	3.59008	4.42067	4.47526	4.03642	NA
M9PGB6;Q9VP29	5.72952	5.68117	5.77041	5.69214	5.58394	5.56748
M9PGC5	4.37646	4.22108	4.25414	4.08132	4.35091	3.72242
M9PGD7;Q9W4R9	4.14468	4.1054	4.14471	4.29293	4.0717	3.86996
M9PGE3;Q9VNY2;Q9VNY4	4.99587	4.86335	4.73583	4.80681	4.45195	4.35012
M9PGG8	4.64263	4.86919	4.78938	4.75856	4.55455	4.59422
M9PGQ4	6.34866	6.22754	6.09236	5.98322	6.19063	6.20799
M9PGW8;Q8IR86	4.78235	4.64419	4.69744	4.46754	3.91779	4.13095
M9PGX9;Q9VYS8	3.66732	3.61882	3.33137	3.94042	3.73736	3.43863
M9PH00;M9PJ12;Q9W4N4	5.2622	5.34529	5.32159	5.27029	NA	5.0677
M9PH19;Q9W002	4.90135	4.93945	5.05129	5.10493	4.96089	4.80796
M9PH32	5.17038	5.68068	5.60409	5.7169	5.55212	5.39105
M9PHB3	4.43236	3.79374	4.3706	4.36735	3.65827	NA
M9PHI7;Q9VRQ1	2.95609	2.66668	2.19813	2.73539	2.12032	2.19392
M9PHI8;Q9VWP8	5.59831	5.56914	5.61058	5.58337	5.61829	5.53467
M9PHK8	3.755	3.84993	3.69246	3.956	4.05837	4.17854
M9PHM0;Q9VWD3	5.21789	4.91258	4.82766	4.85149	5.12181	5.14891
M9PHM9	4.55717	4.25569	3.98896	4.13409	4.0107	4.32427
M9PHP6;M9PI18;Q9VRF7	5.35958	5.28538	5.41411	5.47025	5.30981	5.42981
M9PHS8;Q9VXE7	5.04673	5.06427	4.89016	4.76856	4.88501	4.83631
M9PHV4;Q8IR21	4.03408	3.89459	4.03501	4.19039	3.75109	3.48704
M9PI40;Q9VTY0	4.48624	4.17905	3.97573	4.0958	4.44094	4.04678
M9PI58;Q9VUE5	5.07967	4.88995	4.86108	4.81528	4.73846	4.35755
M9PI96;Q86BI9;Q86BJ0;Q9VVV5;Q9VVV6	5.00789	5.18897	5.08007	5.07309	4.9715	4.80112
M9PIG4;Q9VP27	4.99312	5.03119	4.92036	4.7936	4.81683	4.77037
M9PJJ5	4.758	4.6471	4.70349	4.5321	4.4661	4.27151
O01346	4.45828	4.41231	NA	NA	4.46864	NA
O01367	5.48165	5.32929	5.44123	5.56954	5.05068	5.17113
O01382	4.82534	4.6324	5.19341	5.20064	4.77595	4.90555
O01404	4.2501	4.00233	4.19617	4.10085	4.02188	4.26609
O01666	7.83856	7.91586	7.85008	7.76696	7.79764	7.75814
O01939	3.92632	3.73357	3.65007	3.84243	3.0034	2.76802
O02194	4.45251	4.49287	4.07325	4.59508	4.9304	4.62113
O02195	5.78901	5.87782	5.87638	5.93815	5.75714	5.66289
O02373	4.12903	4.29059	4.1307	4.14329	4.25319	4.1626
O02649	5.96382	5.97185	5.92626	5.90096	5.74511	5.71178
O15943	4.24643	4.06567	4.32083	4.19991	4.25738	4.43612
O15971	5.68214	5.62594	5.32991	5.37524	5.43051	5.30501
O16011	4.83938	4.9112	4.91162	4.8288	4.52698	4.32476
O16043	4.39954	4.18533	4.63268	4.76241	4.44569	4.32779
O16102	5.24519	5.3199	5.09147	5.08339	4.94242	4.61806
O16129	4.11029	4.24642	4.06081	3.98931	3.70168	3.93843
O16130	9.55868	9.78815	9.63462	9.49266	9.61928	9.34641
O16158	6.73808	6.87729	6.97065	6.87026	6.88889	6.66687
O16797	6.06876	6.17999	6.03018	5.86926	5.92494	5.79224
O16844	6.502	6.56956	6.51243	6.31546	6.35723	6.24617
O17444	5.5115	5.40267	5.43477	5.3737	5.4858	5.48695
O17445	6.86684	6.92669	6.56897	6.5418	6.62521	6.46908
O17452	5.04978	5.01552	4.97985	4.94871	4.77201	4.80943
O18332	6.83944	6.7271	6.53351	6.62933	6.68195	6.65034
O18333	6.12505	6.09524	5.87971	5.84227	5.97886	6.01314
O18334	7.15691	7.12103	7.11356	7.1601	7.17041	7.05087
O18335	6.14454	6.09899	5.74755	5.92493	5.99787	6.08402
O18338	5.11142	4.86825	4.85341	4.82667	5.05793	4.8706
O18373	5.56603	5.51944	5.46325	5.47987	5.47457	5.42389
O18388	4.95578	4.84997	4.66662	4.71632	4.56372	4.45721
O18391	5.08125	5.10129	5.15561	4.97546	4.84881	5.06988
O18399	5.73776	5.70518	5.53909	5.42448	5.42199	5.40123
O18404	6.54046	6.54462	6.74827	6.71883	6.55872	6.60779
O18405	5.47556	5.3981	5.17248	5.34823	5.44343	5.23614
O18413	5.71491	5.66585	5.84417	5.96312	5.89627	5.83681
O18640	6.97125	7.05597	7.0311	7.00902	6.90626	6.84608
O18645	4.98091	4.95481	5.01308	4.81125	5.0958	4.8052
O44081	5.10425	5.05443	4.88355	4.86787	4.84508	4.49679
O44226	5.5348	5.58319	5.54491	5.52341	5.43003	5.24551
O44342	4.70487	4.92892	5.19847	5.22587	4.92976	4.95161
O44386	5.49333	5.63508	5.52411	5.4259	5.58303	5.6226
O44434	5.09793	4.90215	5.29212	5.2694	4.96893	4.70203
O44437	6.69751	6.78675	6.70456	6.75136	6.60646	6.55992
O46036	6.6634	6.69692	6.60713	6.65467	6.5151	6.41541
O46037	5.79879	5.68948	5.75341	5.82252	5.60423	5.64722
O46040	5.51842	5.41635	5.2891	5.13457	4.72671	4.78873
O46043	4.36149	4.33847	3.93847	3.91347	4.28181	4.24016
O46067	5.61755	5.68738	5.55426	5.5553	5.59264	5.52568
O46079	3.71027	3.75439	3.92916	3.61627	3.88405	3.73134
O46084	6.1779	6.08982	5.91286	6.0623	6.1201	6.12785
O46094	4.60645	4.63969	4.4769	4.44007	4.3188	4.49847
O46098	6.33905	6.36112	6.09671	6.06515	5.89037	5.92108
O46106	5.23406	5.25675	5.0032	5.02479	4.87939	4.51812
O46339	3.94313	3.90665	3.66433	3.79312	3.79337	3.52409
O61231	5.42594	5.42803	5.17201	5.31317	5.32538	5.13855
O61305	5.42229	5.29174	5.31649	5.40543	5.39634	5.24861
O61307	4.09329	4.02493	4.10266	3.91534	3.95628	4.08635
O61345	4.13059	4.18891	3.9618	3.8747	3.88146	3.59124
O61351	1.89568	2.34257	3.14114	2.41605	1.22791	2.18121
O61366	5.48251	5.62613	5.79546	5.49202	5.63298	5.57541
O61443	4.93368	4.86771	4.77109	4.87216	4.8295	4.88027
O61444	5.45086	5.37947	5.22869	5.30937	5.24388	5.18077
O61491	4.96211	5.00131	5.09038	4.86323	5.47033	5.4996
O61492	5.08587	5.01136	5.12389	4.94695	5.42728	5.54386
O61602	5.51336	5.58157	5.61608	5.45397	5.4009	5.2995
O61604;Q8IQZ7;Q8IQZ8	5.5451	5.45807	5.5073	5.51006	5.47212	5.48321
O61613	5.53338	5.45552	5.41292	5.48814	5.37591	5.23511
O61722	5.47824	5.38978	5.3582	5.38913	5.27332	5.32299
O62526	5.09459	5.10441	4.47267	4.64094	4.68252	4.25623
O62530	5.75223	5.76763	5.6063	5.6259	5.62338	5.54869
O62531	5.87344	5.77622	5.77684	5.7518	5.76995	5.66526
O62602	4.97871	4.88365	4.91306	4.89382	4.31986	4.29138
O62619	7.5794	7.56066	7.37693	7.41027	7.53726	7.34947
O62621	6.00873	6.04118	5.9042	5.90722	5.62179	5.76246
O76206	5.28405	5.29924	5.13304	5.14851	5.10917	4.92411
O76324	5.08002	4.98902	4.82024	4.86001	4.88501	4.84794
O76454	6.52254	6.34614	6.30872	6.48159	6.42348	6.4079
O76464	5.41591	5.37453	5.11608	5.14776	5.26735	5.10671
O76511	4.05717	4.01334	3.50119	3.68421	3.78806	3.58535
O76521	4.99128	5.03379	4.99189	5.02499	4.74886	4.57774
O76742	6.18154	6.12221	6.20165	6.22027	6.09395	6.017
O76752	4.95747	4.96953	4.94497	4.84839	5.02388	4.89242
O76767	5.86858	5.50405	4.99677	5.04715	5.18585	5.02616
O76857	5.26179	5.16158	5.20543	5.27524	5.14824	5.06244
O76863	4.53691	4.7711	4.64717	4.87621	4.78543	4.68507
O76874	5.68675	5.62922	5.83758	5.78857	5.6358	5.71529
O76876;Q8IH14	4.52418	4.54561	4.8759	4.81584	4.5301	4.55616
O76877	5.73778	5.79964	5.90951	5.93968	5.7813	5.70737
O76878	4.64334	4.55464	4.43585	4.59486	4.57904	4.36854
O76879	3.67534	3.74865	5.14353	5.20047	4.47132	4.6559
O76895	5.13064	5.29837	5.12265	5.08254	4.79542	4.37688
O76899	5.27924	5.2931	5.14389	5.14559	5.36546	5.38803
O76902	5.20402	5.26039	5.1527	5.03054	4.79139	4.76366
O76927	6.29475	6.37788	6.47199	6.49627	6.4327	6.27764
O76928	5.42338	5.39032	5.33561	5.39323	5.15722	5.22829
O76932	5.35491	5.374	5.54219	5.56008	5.44085	5.34153
O76994	4.59322	4.63473	4.37988	4.22851	3.62591	4.1647
O77051	4.55205	4.29225	4.61505	4.4126	3.52331	NA
O77059	4.87316	4.81176	5.12274	4.61303	4.61576	4.10764
O77086	3.09543	2.83743	2.52602	2.72677	2.36535	2.39335
O77134	7.294	7.27982	6.83284	6.69996	7.01354	7.11483
O77237	4.55914	4.26929	4.46141	4.07538	4.18066	4.40679
O77263	4.41246	4.44138	4.00574	3.94897	3.96008	3.86046
O77277	4.84536	4.68806	4.42773	4.60549	4.23316	4.27587
O77410	5.03009	4.98613	4.95503	4.98956	4.74854	4.48311
O77425	5.21999	5.23057	5.1232	5.0875	5.09021	4.94568
O77430	5.4349	5.44582	5.5192	5.50056	5.3116	5.24167
O77434	5.63238	5.63189	5.76037	5.72006	5.66136	5.58062
O77436	5.30615	5.03717	4.83907	4.8492	4.60675	4.5249
O77460	6.69147	6.7371	6.61921	6.55927	6.60241	6.3565
O77475	4.38308	4.00159	3.76409	3.80772	4.05933	4.21799
O77477	5.03545	4.96193	5.08474	5.13707	4.79153	4.96862
O96299	3.95024	3.77648	3.8789	4.00608	3.56171	3.79089
O96539	3.74652	4.06949	3.98917	3.76782	3.70894	3.58908
O96553	5.93799	5.91519	5.41134	5.51811	5.55735	5.1942
O96651	4.147	4.39267	4.47531	4.43343	4.10779	4.23998
O96692	4.81813	4.69441	4.624	4.61839	4.80865	4.63355
O96824	5.55412	5.6058	5.67045	5.51026	5.46085	5.54171
O96827	5.80325	5.78715	5.90448	5.8891	5.82964	5.59811
O97059;Q9V3L8	4.05253	4.10824	4.3232	4.12305	3.7562	3.57126
O97062	3.84322	3.33924	3.71976	3.44928	3.49663	4.45209
O97064	5.16264	5.13415	5.49943	5.25217	5.20339	5.09816
O97066	5.80005	5.79262	5.77916	5.75597	5.74815	5.67675
O97067	4.96108	4.85466	4.80998	4.66515	4.83093	4.59652
O97069	5.5988	5.64308	5.67977	5.13329	5.7512	4.99335
O97102	5.57782	5.69098	5.40617	5.50156	5.5404	5.48921
O97111	4.71438	4.8534	4.28531	4.3805	4.27845	4.76148
O97125	6.69578	6.76888	3.76158	3.7091	3.69482	3.52519
O97159	5.24516	5.19312	5.16826	5.10311	4.81811	4.81718
O97172	5.32181	5.4524	5.07021	4.86134	5.13845	4.55521
O97182	5.61293	5.44347	5.47795	5.38081	5.40981	5.3887
O97183	5.54486	5.60691	5.65101	5.66845	4.91322	5.13647
O97365	5.51382	5.83138	5.66603	5.6487	5.45742	5.35773
O97394	4.35331	4.38733	4.48508	4.43294	4.46506	4.45096
O97418	6.48072	6.3667	6.45519	6.36053	6.44877	6.4521
O97420	4.94274	4.88795	5.2063	5.32446	4.8869	5.02694
O97422	5.27935	5.29489	5.26925	5.26981	4.84387	5.34666
O97428	6.14752	6.27941	6.51	6.48718	6.50207	6.48861
O97454	4.92786	5.10933	5.11998	4.98938	4.63912	4.51052
O97477	6.46138	6.45557	6.02139	6.17456	6.28184	6.07593
O97479	5.54602	5.53432	4.59717	4.89837	4.97866	4.36853
P00334	8.99377	9.09351	8.81282	8.78009	8.99733	8.88888
P00399	7.54656	7.32468	6.87691	7.04456	7.37803	7.4262
P00408	6.50753	6.29379	6.29359	6.21208	6.88294	7.00391
P00522	5.76164	5.81052	5.73635	5.69281	5.76428	5.7817
P00528	4.4178	4.46557	4.61177	4.47665	4.45114	4.34529
P00967	5.66599	5.59143	5.25326	5.38213	5.45623	5.06295
P02255	6.80179	6.92601	6.64589	6.58126	6.37579	6.39585
P02283	7.89721	8.19224	8.36388	8.13833	7.10496	7.29861
P02515	5.75522	5.90914	2.58586	2.07964	1.98845	1.22879
P02516	7.21453	7.28719	6.49297	6.41268	6.15484	6.08287
P02517	6.82104	6.80681	4.90484	4.77927	4.51892	4.5104
P02518	6.38564	6.37812	5.23921	5.38108	4.98589	5.00399
P02572	5.72949	5.53406	4.96812	4.52742	5.49288	5.27131
P02574	5.01058	5.81876	5.0545	5.48763	5.41087	5.16572
P02825;P82910	4.74072	5.15312	3.20657	2.94955	3.09515	3.19768
P02828	7.22315	7.246	7.06112	7.11536	7.05518	7.00444
P02840	4.62929	4.74524	5.2922	5.77068	5.62377	NA
P02842	6.84596	6.84603	6.90858	7.40925	7.33475	6.31584
P02843	7.41431	7.70282	7.48988	7.15073	6.48767	6.3617
P02844	7.77113	8.15612	8.00896	7.59034	7.06768	6.88657
P04052	4.88128	4.95844	4.89354	4.78549	4.39049	4.33923
P04359	6.66827	6.79178	6.62443	6.51223	6.59592	6.35752
P04388	5.3476	5.20198	4.9877	5.17457	5.47688	5.45397
P04412	4.54247	4.57962	4.30154	4.43731	4.19332	4.33826
P04657	3.23538	2.80471	3.0616	2.86633	2.58291	2.37351
P04755	4.79218	4.5338	5.02644	4.80344	4.75181	4.1885
P04950	6.77741	6.69114	6.30095	6.24508	6.47428	6.33616
P05031	4.45223	4.44911	4.48771	4.64631	4.46209	4.51682
P05130	4.85327	4.80835	4.76585	4.76248	4.33652	4.2522
P05205	4.76165	4.98122	4.96044	4.96257	4.96265	5.0633
P05303	6.33871	6.1722	6.38923	6.41546	6.28233	6.21441
P05389	5.84962	5.90618	5.99236	6.04542	5.49879	5.77299
P05552	5.78821	5.59299	5.52857	5.4537	4.97611	5.14325
P05661	6.76388	6.78156	6.96611	6.79303	6.57227	6.60945
P05812	4.43916	4.38046	4.46313	4.20031	3.69843	3.83895
P05990	5.07794	4.95452	4.8054	4.91411	4.59349	4.50034
P06002	7.26306	7.20083	6.96964	6.92276	7.19849	7.08853
P06603;P06605	7.55468	7.59661	7.45745	7.50128	7.43145	7.42244
P06604	8.47116	8.51454	8.38947	8.46551	8.35383	8.39876
P06607	8.11885	8.50388	8.2809	7.94222	7.19201	6.85674
P06742	6.66761	6.79492	7.33431	7.06678	6.82661	6.79947
P06754	6.16542	6.04272	6.29688	6.24838	6.22606	6.23971
P07140	6.17689	6.11043	6.00499	5.93416	6.28225	6.28002
P07486	7.21801	7.23681	7.24674	7.29613	7.3894	7.14095
P07487	7.75623	7.8266	7.70948	7.74679	7.72113	7.58491
P07668	6.1726	6.09412	5.95792	5.95375	6.03945	6.10216
P07701	5.35325	5.45422	5.20328	6.13525	5.76098	4.20469
P07764	8.04607	8.03555	7.94293	7.91834	8.04741	7.9919
P07909	3.49602	3.70502	4.40616	3.96953	4.24435	4.15863
P08099	4.80763	4.51862	4.38216	4.10243	4.24155	4.13107
P08111	5.22514	5.15943	5.15214	5.12387	4.96518	4.96521
P08120	4.90466	4.7754	4.93784	4.87308	4.6735	4.81817
P08144;P81641	3.11212	4.71537	3.12168	3.03004	3.76181	3.76608
P08171	6.19885	6.33801	6.3418	6.05267	6.2494	5.65714
P08181	5.44085	5.42062	5.17229	5.21421	5.30875	5.32585
P08182	5.87443	5.7651	5.82033	5.79094	5.6768	5.71587
P08255	5.95292	5.91624	5.56341	5.49675	5.42745	5.64297
P08266	4.65436	4.62699	4.49901	4.47687	3.82257	3.77041
P08510	5.34158	5.25447	5.02441	4.90931	5.07699	5.14175
P08570	7.18484	7.30679	7.38484	7.35298	7.28	7.16647
P08645	5.76163	5.66587	5.71198	5.69397	5.71936	5.67985
P08646	5.62718	5.65094	5.8006	5.69407	5.68074	5.58604
P08736	7.77243	7.81989	7.60274	7.67624	7.59313	7.46745
P08761	5.02581	4.95268	4.87522	4.77295	4.27396	4.80787
P08841	5.57228	5.69427	5.68168	5.79007	5.60013	5.7119
P08879	8.42813	8.45441	8.34216	8.30472	8.35189	8.18493
P08928	5.80952	5.74786	5.79788	5.76557	5.33934	5.3276
P08985	5.03033	5.31894	5.23409	4.95578	4.01163	4.18391
P09180	7.03989	7.05344	6.99371	6.95863	6.98361	6.85399
P09491	5.72091	5.67937	5.99139	5.90553	5.90169	5.97658
P0DKM0	4.85455	4.66924	4.55305	4.50331	4.26676	4.04234
P10040	4.84025	4.84758	4.59326	4.47634	4.67961	4.68782
P10090	5.46358	5.37544	5.37376	5.20842	5.55753	5.52588
P10180	4.53342	4.65713	4.54038	4.22033	4.3939	4.32769
P10351	4.56527	4.53607	4.07165	4.26637	4.19747	3.95498
P10379	6.18077	6.13534	6.04897	6.03466	6.2714	6.26506
P10674	6.92825	6.86506	6.63251	6.54701	6.84572	6.91002
P10676	7.29501	7.27386	7.13675	7.18682	6.92455	6.93935
P10735	4.90378	4.8469	5.04709	4.81424	4.99144	4.6335
P10987	8.47315	8.48578	8.36191	8.38809	8.44053	8.55563
P11046	5.29781	5.28404	5.21233	5.1974	5.05856	5.01947
P11146	4.0028	4.35279	4.66762	4.26953	4.41228	4.40078
P11147	7.19143	7.30162	7.28622	7.24255	7.25912	7.29778
P11346	4.70976	4.70231	NA	4.76729	4.65153	NA
P11584	4.73476	4.66764	4.54037	4.37164	4.86131	4.84719
P11929	6.26309	6.21397	5.1829	4.9779	5.05976	4.5851
P11995	2.84262	4.60882	4.8481	4.10271	4.51352	2.02888
P11996	4.22344	4.93559	5.12048	4.94878	5.0439	4.34981
P11997	3.51228	5.49377	6.51917	5.80905	5.4107	3.87694
P12024	7.54514	7.45682	7.11451	6.99035	7.34474	7.35532
P12080	5.39047	5.4379	5.42812	5.35908	5.57572	5.75737
P12370	5.57187	5.54117	5.31832	5.29659	5.30753	5.28951
P12426	6.78612	6.86449	6.66802	6.5867	6.59822	6.34381
P12428	5.13978	5.23726	5.18083	4.9554	5.27392	5.28906
P12613	6.05944	6.05665	6.07305	6.10395	6.05648	5.98354
P12646	5.4576	5.43124	5.24512	5.31805	5.42887	5.114
P12881	5.90809	5.93148	6.04542	6.10689	6.0212	6.03402
P13008	5.00486	4.99311	4.88235	4.89774	4.92647	4.86886
P13060	6.65509	6.6444	6.56946	6.64193	6.54709	6.46613
P13217	6.26231	6.28928	6.17471	6.15769	6.18312	6.0018
P13395	6.05641	6.02709	6.03573	5.96371	5.96154	5.92948
P13469	5.65966	5.62727	5.69553	5.63427	5.58508	5.39051
P13496	5.18401	5.12399	5.1176	5.12414	5.05271	5.13815
P13582	4.20018	4.25966	4.08902	3.94407	4.53721	4.3091
P13607	8.03654	8.00136	7.91734	7.8233	8.10768	8.13401
P13677	6.40599	6.39564	6.2839	6.28939	5.97811	5.87863
P13678	5.01774	5.02124	4.99802	4.85792	4.70525	4.66993
P13706	8.08678	8.19456	8.00362	7.8891	7.816	7.53
P13709	5.45355	5.32326	5.28046	5.40808	4.7351	4.95651
P14199	4.75615	5.13081	4.68432	4.56709	4.50382	4.55308
P14318	5.65223	5.78333	6.31182	6.25116	6.46009	6.61254
P14484	5.28097	5.45544	5.69387	5.32381	5.69292	5.58435
P15007	7.20354	7.23926	7.07216	7.04053	7.1977	7.03479
P15215	5.44976	5.42641	5.3451	5.4036	5.23208	5.20097
P15278	5.9555	5.89958	6.04108	5.96494	6.10106	6.16797
P15330	5.04725	5.12089	5.27454	5.35291	4.92618	5.17541
P15348	4.9689	4.9718	5.03009	4.95582	5.01916	4.91202
P15357	6.11485	6.24824	6.5748	6.32858	6.3985	6.1299
P15364	5.5065	5.31024	5.31666	5.30153	5.46878	5.50473
P15372	6.70518	6.64974	6.69926	6.63522	6.02362	6.20802
P15425	5.31447	5.24184	5.0237	5.01231	5.13989	5.15286
P16371	5.42697	5.35013	5.18241	5.40619	5.25771	5.29941
P16378	6.98306	6.97009	6.80018	6.75975	6.97288	7.01357
P16554	4.63533	4.50195	4.56246	4.56825	4.36875	4.27435
P16568	4.58308	4.4446	4.51087	4.46545	4.43046	4.40253
P16620	4.96119	4.92864	4.91889	4.74573	4.87282	4.74298
P16621	4.41023	4.24516	4.24605	4.27782	4.13737	4.19108
P16905	6.04925	6.04709	6.05466	6.03078	5.67385	5.58458
P16914	5.06899	5.12949	5.18597	5.22654	5.03645	5.01634
P17133	4.36956	4.13721	4.21111	4.22786	3.90063	3.66297
P17210	5.03583	4.9326	4.91208	4.90122	4.91428	4.81374
P17276	6.83229	6.89405	6.88213	6.88934	6.82743	6.77383
P17336	6.53912	6.59771	6.62936	6.59584	6.47517	6.48226
P17704	6.69266	6.62457	6.93846	6.92071	6.88631	6.63561
P17719	5.71253	5.67017	5.70534	5.91816	5.95686	5.7175
P17886	4.19086	4.26984	4.09348	4.2569	3.7124	3.90488
P17917	4.87343	4.90574	4.87743	4.82069	4.7881	4.72162
P17971	4.53301	4.47908	4.53459	4.24787	4.42512	4.4437
P18053	6.22213	6.28124	6.30178	6.33229	6.28664	6.28599
P18091	6.32111	6.39147	6.51823	6.55138	6.0742	5.70631
P18173	4.62743	4.66589	4.72952	4.4484	5.00276	4.90484
P18431	5.62316	5.49379	5.46557	5.52207	5.52604	5.42096
P18432	6.7471	6.80887	7.06678	6.83972	6.76558	6.78486
P18459	5.44828	5.26709	5.19391	5.12743	5.17314	5.27904
P18489	7.06981	6.9378	7.1699	7.09181	7.23294	7.21497
P18824	4.78834	4.60579	4.56823	4.61868	4.60418	4.6744
P18929	8.07873	7.81932	7.72399	7.65442	7.63276	7.54927
P18930	7.45028	7.50012	7.35349	7.27555	7.30968	7.2284
P18931	5.87476	5.3876	4.82014	5.17277	5.36197	5.09456
P18932	7.15403	6.96858	6.87566	6.81591	6.96902	6.91968
P18934	6.1961	6.14038	6.20883	5.8985	6.32665	6.15552
P18935	5.87961	5.88454	5.76361	5.70154	5.7367	5.32673
P19107	7.47913	7.54781	7.38491	7.31564	7.23791	7.20585
P19109	4.35386	4.49933	4.99449	4.56219	4.63516	4.64644
P19334	6.32245	6.28385	6.20242	6.11375	6.253	6.06403
P19351	6.9926	7.09343	7.26053	7.10664	7.1911	7.2227
P19889	6.93065	6.99546	6.99875	6.95076	6.99408	6.8658
P19967	6.45731	6.40907	5.72758	5.91467	5.65244	5.12974
P20007	4.90053	5.30595	5.86755	5.90292	5.41613	5.4297
P20153	5.2852	5.32835	5.25023	5.19374	4.91064	4.79129
P20228	6.65915	6.6127	6.46743	6.46213	6.67835	6.63761
P20232	4.80008	4.72172	4.84406	4.88668	4.76879	4.6553
P20240	3.59333	3.07249	2.9825	3.07197	3.97105	3.92496
P20241	5.42764	5.36544	5.45082	5.34137	5.48143	5.5165
P20348	6.52556	6.68851	6.67512	6.60363	6.71765	6.43687
P20351	5.36421	5.31553	5.03073	4.98511	5.28218	5.08521
P20353	5.97246	6.21531	6.00751	6.03633	6.05586	6.04749
P20354	5.59491	5.53945	5.35719	5.36913	5.39132	5.45332
P20432	6.94854	7.06924	6.92734	6.89847	6.99024	6.93051
P20477	7.26273	7.33092	7.37029	7.32569	7.38284	7.46521
P20478	7.25711	7.33734	7.29514	7.2403	7.12194	6.92309
P21187	5.65316	5.61764	5.69294	5.72566	5.49364	5.50546
P21521	6.6069	6.58946	6.44257	6.40087	6.53511	6.5072
P21914	6.80495	6.835	6.72486	6.60716	6.66215	6.68745
P22058	5.06982	5.01282	5.10704	5.10482	4.89832	4.80198
P22464	6.84208	6.88671	6.88769	6.88253	6.82741	6.81736
P22465	6.93394	6.94262	6.86109	6.89448	6.94169	6.99783
P22700	7.26958	7.15638	7.05089	6.90915	7.03855	6.88047
P22769	5.1682	5.13785	5.10123	5.24736	5.27932	5.32065
P22810	1.98172	2.46309	1.40677	NA	NA	NA
P22813	4.42553	3.74871	3.62957	4.27635	3.67588	3.74647
P22815	5.09674	5.0622	4.79425	4.76674	4.74877	4.59937
P22817	5.20642	5.21482	5.11069	5.04142	5.0167	4.73629
P22978	4.70867	5.08954	3.92458	3.89228	NA	NA
P22979	4.68844	4.68495	4.74684	4.68094	4.68965	4.5263
P23128	4.97136	4.9779	4.95182	4.96484	4.84295	4.58288
P23226	5.14498	5.00996	5.13157	5.10357	5.02394	4.92801
P23257	4.74162	4.73323	4.70261	4.83113	4.48005	4.46572
P23380	6.62154	6.40963	6.46412	6.40748	6.70618	6.53565
P23625	6.74289	6.7341	6.49596	6.43026	6.56162	6.36903
P23654	5.282	5.22835	4.953	4.92666	5.05727	5.09501
P23696	5.91008	5.96498	5.98801	5.96489	5.88284	5.82616
P23779	7.35782	7.3434	7.32683	7.28412	6.93044	6.77291
P24156	6.22086	6.2355	6.23971	6.1348	6.1083	6.13002
P25007	7.77467	7.90031	7.8056	7.74154	7.7659	7.77152
P25123	5.51035	5.39948	5.45435	5.32825	5.35177	5.26741
P25153	7.29789	7.41177	7.42955	7.40809	7.23391	7.12615
P25160	4.95568	4.81042	4.64575	4.95803	4.75977	4.28267
P25161	5.34403	5.30789	5.4896	5.5871	5.55537	5.46339
P25162	4.94793	4.51461	5.11468	4.84383	4.43024	4.4041
P25171	4.75616	4.72624	4.59224	4.59614	4.5273	4.60506
P25228	5.68862	5.64055	5.64752	5.66192	5.7273	5.69001
P25439	4.83395	4.67744	4.65891	4.64141	4.24651	4.11348
P25455	5.41269	5.35188	5.29604	5.32002	5.31119	5.3358
P25822	4.0797	4.07205	4.31459	4.38338	3.98822	3.93652
P25823	3.68361	3.51677	3.38406	3.51795	3.2123	3.08744
P25843	7.4077	7.42121	7.75495	7.71034	7.56355	7.64226
P25867	6.40429	6.4101	6.65035	6.62625	6.58884	6.38703
P25991	4.81975	4.61032	4.67734	4.73598	4.55345	4.23112
P25992	6.30762	6.61569	6.54405	6.44254	6.38303	NA
P26270	5.5757	5.57246	5.64236	5.70527	5.73912	5.76223
P26308	7.91007	7.89483	7.76682	7.69301	7.89877	7.95486
P26686	5.54579	5.57883	5.51972	5.4332	5.21103	5.10398
P26802	6.58381	6.59686	7.95452	7.59546	7.32335	7.20962
P27398	4.14128	4.40865	4.34283	4.19177	4.36049	3.82414
P27619	6.79835	6.75891	6.59438	6.58796	6.65315	6.59953
P27716	5.79804	5.59761	5.43676	5.29748	5.72735	5.78979
P27779	2.09549	1.79152	NA	1.66436	2.338	2.2281
P27864	4.44827	4.46427	4.28317	4.21829	4.11855	4.2836
P28466	4.8239	5.16287	4.36432	NA	3.90687	4.47647
P28668	4.95617	4.91858	4.88016	4.97669	4.90337	4.80125
P29052	4.49136	4.55875	4.44587	4.40421	4.61691	4.43089
P29310	7.05092	7.1068	7.27647	7.27575	7.21919	7.37393
P29327	6.35984	6.38777	6.4226	6.43711	6.41062	6.23704
P29349	4.22623	4.30677	4.47782	4.39829	4.1232	3.94196
P29413	6.02739	6.04953	6.07346	6.10718	6.02817	5.84917
P29613	6.45296	6.6049	6.48997	6.4413	6.46071	6.45842
P29742	6.11149	6.10933	6.03487	6.04382	5.89303	5.85062
P29746	5.7395	5.68339	5.9351	5.88402	6.00427	5.96249
P29829	6.92829	7.02521	6.87655	6.83062	6.88631	6.6719
P29843	4.10466	4.32469	4.04079	4.1513	4.12221	4.04167
P29844	6.44237	6.53266	6.42029	6.38346	6.35985	6.35399
P29845	6.16714	6.14312	6.04639	6.04355	5.93013	5.81458
P29993	4.88787	4.7803	4.72052	4.54905	4.40935	4.41434
P30189	5.29983	5.53353	5.47125	5.45303	5.18047	5.13403
P31007	5.60809	5.56416	5.53775	5.45412	5.54018	5.59935
P31009	6.16084	6.239	6.14572	6.14289	6.20854	6.00401
P31409	6.82252	6.87526	6.85006	6.77531	6.91061	6.96389
P32100	6.71689	6.77507	6.68485	6.69913	6.68324	6.54366
P32234	5.39663	5.33047	5.20106	5.31071	5.17994	5.08431
P32392	5.63553	5.59137	5.58896	5.58041	5.52242	5.53257
P32748	4.82992	4.78444	4.71988	4.72239	4.71644	4.80084
P32865	5.56645	5.43766	5.57117	5.70702	5.3539	5.37066
P32866	4.55813	4.56876	4.52218	4.44387	4.43406	4.43263
P33085	5.18331	5.17003	5.36341	5.22319	5.23847	5.13035
P33270	6.00121	6.02962	5.82933	6.1725	5.3971	5.55142
P33438	5.78602	5.80965	5.51087	5.57093	5.87056	5.90678
P34082	5.80726	5.80308	5.70256	5.6359	5.90998	5.85964
P35122	5.17529	5.19533	5.36382	5.2659	5.08663	5.15255
P35128	7.08349	7.17881	7.13362	7.10392	7.12397	6.95479
P35220	4.29489	4.16699	4.28102	4.1554	4.0479	4.04067
P35381	7.60885	7.6276	7.49002	7.41449	7.51073	7.5891
P35415	6.16929	6.13508	6.41997	6.25204	5.70884	5.78447
P35416	6.02019	5.97408	5.77084	5.70086	5.02715	4.88715
P35421	5.86084	5.87975	5.51526	5.52226	5.67838	5.37827
P35832	5.02484	4.94403	4.91724	4.83736	4.88609	4.95454
P36179	6.06563	6.0223	5.97939	6.08253	6.02519	5.96815
P36188	6.78337	6.90006	7.00522	6.7684	6.82486	6.67615
P36241	5.99193	6.06131	5.77836	5.6917	5.82892	5.70031
P36872	5.7094	5.67699	5.59281	5.61607	5.31246	5.33609
P36951	6.21713	6.29704	6.11191	6.16872	6.37408	5.96405
P36958	4.83537	4.90724	4.47942	4.51322	4.25457	4.12085
P36975	5.31856	5.21997	5.25691	5.11585	5.18799	5.21185
P37159;P83972;Q08694	4.17563	5.22171	3.93159	3.89223	NA	3.97735
P37193	5.67695	5.77087	5.28837	5.55698	5.42407	5.49839
P37236	6.0196	5.82633	5.73457	5.8166	5.91191	5.65786
P37276	5.44253	5.36968	5.28596	5.32375	5.26719	5.20109
P38040	6.13427	6.08383	5.81667	5.8051	5.98489	5.95695
P38979	7.22126	7.34276	7.34255	7.36229	7.33354	7.17601
P39018	6.66928	6.71016	6.61948	6.65005	6.64066	6.43406
P39205	5.79417	5.89961	5.74693	5.78284	5.78611	5.73564
P40301	5.86443	5.86779	5.78012	5.95943	5.94466	5.92579
P40304	5.74026	5.75737	5.76177	5.81313	5.84317	5.59216
P40320	5.0382	5.05282	4.75467	4.67592	4.76857	4.3971
P40417	5.85608	5.83805	5.66614	5.71759	5.67943	5.59169
P40421	5.09837	5.05557	4.97963	4.85338	4.63884	4.57405
P40423	5.78651	5.75027	5.7888	5.70147	5.57426	5.58201
P40427	4.67126	4.87112	4.53484	4.95483	4.62177	5.09414
P40792	5.96035	5.76733	5.8427	5.76581	5.82887	5.75894
P40793	5.20443	5.05036	4.82605	4.83124	5.0047	4.79517
P40796	5.5561	5.53456	5.49931	5.44784	5.46971	5.31106
P40797	4.9738	4.93779	4.84395	4.88143	4.95872	4.88311
P40945	5.84833	5.71721	5.5398	5.6979	5.61218	5.50384
P40946	5.35006	5.20982	4.92142	5.12463	5.06965	4.87396
P41042	6.21439	6.33512	6.19481	6.11811	6.17074	5.99953
P41043	6.04266	6.00422	6.05327	6.06092	6.14845	5.93884
P41044	5.90677	5.80235	5.81062	5.8541	5.66081	5.35991
P41073	5.32252	5.35511	5.41991	5.48148	5.27721	5.27362
P41092	6.45371	6.6164	6.42377	6.3337	6.33097	6.21278
P41093	5.90511	5.97146	5.98259	5.96354	5.98454	5.88322
P41094	5.84867	5.91549	5.87963	5.86895	5.82566	5.73136
P41126	5.64879	5.68295	5.58247	5.52017	5.64044	5.49799
P41374	5.31507	5.29552	5.27932	5.29485	5.16577	4.99334
P41375	5.73179	5.75114	5.60835	5.67256	5.55738	5.34778
P41572	5.99056	6.02644	5.6268	5.75891	6.06344	5.69122
P41964	4.04583	5.5539	3.13784	3.01878	3.92229	3.65121
P42207	4.99846	4.80483	4.80636	4.83977	4.73589	4.86221
P42281	6.98253	7.18576	6.6333	6.55289	6.66478	6.32858
P42282	5.09603	5.23713	5.25142	5.23356	4.76514	4.82843
P42325	5.60836	5.56629	5.35186	5.44813	5.48874	5.438
P42787	4.77929	4.7511	4.73717	4.68405	4.78219	4.69301
P43125	6.06544	6.06602	5.96791	5.94667	5.67261	5.66743
P43332	4.9089	4.98105	4.82741	5.02269	4.82926	4.72174
P45437	4.98747	4.93448	4.83286	4.90345	4.7315	4.66744
P45594	6.66241	6.7274	6.7579	6.85795	6.71062	6.69418
P45843	4.83304	4.73447	4.70111	4.89447	4.98673	5.08151
P45884	4.64265	4.63092	NA	NA	4.48534	5.13315
P45888	5.49989	5.43082	5.37912	5.42097	5.4493	5.29943
P45889	5.12019	4.94786	5.01444	5.08663	4.97804	4.9466
P46150	6.09618	6.12688	6.01911	6.03967	6.02833	5.92702
P46222	5.85314	5.95472	5.91542	5.82545	5.7858	5.63117
P46223	6.00993	6.09999	5.99149	5.91532	6.02695	5.79378
P46415	6.15867	6.29122	6.15774	6.17233	6.12743	5.94061
P46461	6.75831	6.73348	6.70666	6.71003	6.54311	6.58512
P46824	5.33115	5.28569	5.29935	5.29209	5.17291	5.06301
P46867	4.95538	4.65589	4.63946	4.96607	4.62426	4.77501
P47825	4.13374	4.00133	3.76893	4.07912	NA	3.62849
P47947	6.18006	6.38748	6.34924	6.41933	6.327	6.21612
P47948	NA	NA	5.16316	4.94548	5.18581	5.58521
P47949	3.06158	3.14285	5.56975	5.49051	5.82577	6.32442
P48148	5.99451	6.03057	6.02172	5.91932	6.01778	5.8889
P48149	6.02905	6.11844	6.00454	6.12277	6.099	5.8545
P48159	6.83415	7.08437	7.03959	7.00534	7.11257	6.92212
P48375	6.67985	6.92692	6.85431	6.79443	6.91813	6.76121
P48451	5.30412	5.34557	5.11666	5.35119	5.20841	5.27537
P48461	5.93244	5.99001	5.86369	5.85739	5.77055	5.74148
P48462	6.17239	6.16856	6.06651	5.99751	5.90855	5.88197
P48554	5.70474	5.74398	5.54211	5.55342	5.55417	5.58862
P48555	5.91636	5.91826	5.82078	5.6976	5.9104	5.84398
P48588	6.59779	6.83913	6.82989	6.66263	7.09749	6.83524
P48593	4.88968	4.93534	4.9934	4.68421	4.7114	4.64179
P48596	6.44023	6.44355	6.97098	7.01258	6.98776	7.18652
P48598	4.4986	4.52081	4.51276	4.37522	4.32153	4.23865
P48601	5.54274	5.47219	5.61198	5.69871	5.71669	5.67067
P48602	7.04006	7.03272	6.93554	6.93744	7.08646	7.09843
P48603	5.30119	5.28711	5.10263	5.06477	5.05347	5.08372
P48604	5.26527	5.32078	5.33824	5.21604	5.18868	4.85637
P48605	5.86146	5.85961	5.85976	5.87364	5.84253	5.81441
P48607	4.98635	5.04034	4.98734	4.99934	4.99117	5.0231
P48609	5.31513	5.30575	5.24141	5.25549	5.07918	5.15107
P48610	7.35625	7.40471	7.41368	7.34632	7.53317	7.50588
P48611	4.64359	4.85049	5.00318	4.84231	4.52379	4.57392
P48612	5.11263	5.25326	4.97547	4.92491	5.27729	5.053
P48809	5.64278	5.68386	5.72334	5.87586	5.28986	5.19285
P48810	3.82206	3.49568	4.08207	3.98245	3.92025	3.77557
P48994	5.18082	5.02812	5.08893	5.10303	4.73802	4.7174
P49021	NA	5.32774	5.37635	5.24978	5.68792	5.52437
P49028	5.44002	5.44876	5.52885	5.46225	5.36054	5.01052
P49071	5.05054	5.03615	4.98279	5.01375	4.88752	4.77076
P49283	4.62867	4.8501	5.06597	4.71194	5.17455	4.85566
P49455	7.49182	7.56185	7.66573	7.71153	7.81578	7.86985
P49630	5.65386	5.78278	5.60771	5.46755	5.51601	5.33744
P49657	4.28474	4.18239	3.9251	3.69612	3.76447	3.66282
P49762	4.63375	5.31127	5.30071	5.08741	4.52013	4.32448
P49846	4.60216	4.68621	4.41753	4.40694	4.2025	NA
P49847	4.1884	4.23306	4.20325	3.80812	4.10593	3.98006
P49858	6.24892	5.95947	6.00992	5.89967	6.15771	6.05255
P49963	5.08923	5.28939	5.30173	5.44013	5.40517	5.3199
P50245	4.49894	4.40273	4.33903	4.46014	4.38212	4.69898
P50882	6.86996	6.88894	6.76808	6.78258	6.80681	6.69009
P50887	5.68361	5.78631	5.81974	5.80826	5.95712	5.82522
P51123	4.43495	4.52609	4.26036	4.47701	3.77805	4.20983
P51140	5.1138	5.46079	5.19793	5.18012	4.99435	4.92043
P51406	3.94588	3.74505	3.7571	3.5872	3.17624	3.46
P51592	4.56303	4.51373	4.52686	4.50805	4.0747	4.10201
P51905	4.60514	4.54725	4.5439	4.3036	4.72124	4.98327
P52029	6.32459	6.31824	6.01943	6.05121	6.15858	5.9913
P52034	6.41865	6.40779	6.38425	6.3994	6.29703	6.2521
P52302	4.55066	4.40446	4.17341	3.97235	4.42584	3.99255
P52486	5.02146	5.09578	4.92613	4.92346	5.00333	4.82062
P52654	4.83818	4.77427	4.3864	4.36427	4.44786	4.65498
P53501	7.88498	7.80426	8.00873	8.01026	7.98484	8.02884
P53624	4.93333	4.79895	4.74801	4.77505	4.76355	4.80086
P53777	5.11146	5.22658	5.71825	5.54458	5.46704	5.50534
P53997	4.84918	5.0094	4.9194	4.8909	4.98113	4.86506
P54185	4.90674	4.81216	5.20031	5.04468	5.25562	5.22142
P54191	5.26013	5.31268	5.35332	5.2379	5.35289	5.5715
P54192	6.21125	6.11358	6.2856	6.07361	6.3946	6.23991
P54193	4.40586	4.34197	4.53797	4.38063	4.61104	4.33548
P54195	2.61287	2.93663	3.65379	3.7372	2.95888	2.98616
P54351	5.10841	4.99069	4.9934	5.01417	5.00211	4.92875
P54352	5.33622	5.28944	5.07367	5.01781	5.10594	4.71988
P54353	5.78074	5.7211	5.67187	5.64765	5.39086	5.43948
P54357	5.45257	5.39477	5.37681	5.34618	5.31612	5.51884
P54359	5.00672	5.01416	4.88126	4.94259	4.94278	4.84052
P54362	5.09336	4.80466	4.68317	4.95828	4.60259	4.79777
P54367	5.21801	5.22767	5.0629	5.11362	4.76697	4.71636
P54385	6.97491	6.98433	6.8581	6.82302	6.98942	6.91558
P54397	5.21521	5.17876	5.29293	5.11671	5.44532	5.41202
P54398	2.53484	4.0497	5.92586	5.71342	6.11829	6.10636
P54399	6.86234	6.963	6.91425	6.9145	6.82847	6.72834
P54611	6.3864	6.35652	6.29664	6.20548	6.33171	6.37506
P54622	5.32832	5.43881	5.44014	5.32993	5.389	5.1666
P55035	5.43946	5.44999	5.70296	5.7793	5.68902	5.72549
P55162	5.14445	5.105	4.83141	4.9183	4.78955	4.72093
P55824	5.13348	5.03716	5.02315	5.01747	4.7936	4.73982
P55828	6.0854	6.14927	5.99493	5.96603	6.15544	6.03104
P55830	6.34962	6.48171	6.34404	6.42374	6.45517	6.26387
P55841	7.25696	7.33006	7.30129	7.25105	7.25901	7.20209
P55935	6.96398	7.03886	6.8461	6.80517	6.74642	6.6165
P56079	5.66287	5.454	5.33628	5.35206	5.52519	5.45943
P56538	5.06388	5.0434	5.23367	5.10948	4.89301	4.9458
P61209	6.57049	6.5246	6.41764	6.47118	6.47889	6.43191
P61849	5.45731	5.32491	5.22669	5.14173	5.17438	5.16629
P61851	6.04076	6.20547	6.14117	6.10008	6.04391	6.1394
P61857	5.49222	5.27828	5.72115	5.5814	5.48848	5.82943
P62152	7.77529	7.72061	7.66597	7.70606	7.5591	7.46246
P80455	6.62203	6.6682	6.63007	6.60084	6.51618	6.37123
P81900	6.56614	6.54636	6.45132	6.47343	6.51851	6.48891
P82147	4.49545	4.60905	5.13651	5.05368	4.62813	4.81557
P82295	4.77558	4.16233	4.39119	4.11788	4.38099	4.21221
P82712	4.94886	4.87281	4.96289	4.51056	3.95319	4.07609
P82713	3.82724	4.05778	3.36781	3.13926	3.41614	3.28707
P82890	5.22632	5.22609	5.06162	4.93608	5.1305	5.13155
P83094	5.10305	4.99179	4.90559	4.86761	4.8765	4.70827
P83097	5.69723	5.69522	5.54399	5.51047	5.58843	5.51126
P83967	7.66304	8.04691	7.89537	8.0995	8.14799	7.96017
P84029	6.76873	6.88922	6.57404	6.54608	6.77426	6.46726
P84040	6.65547	6.93653	7.02652	6.81874	5.80055	5.99135
P84051	4.07158	4.25648	5.3512	4.55831	3.58972	3.57272
P84345	8.19638	8.16877	8.11675	7.94865	8.17369	8.05648
P91621	4.74974	4.46856	5.08223	4.7405	3.77133	3.54666
P91622	5.55395	5.58759	5.74835	5.68865	5.6669	5.73175
P91634	3.77514	3.8006	2.87896	3.50941	2.80617	3.5808
P91657	5.41613	5.27969	5.0026	4.7068	4.91958	4.47218
P91679	4.46761	4.47013	4.27104	3.92035	4.302	4.667
P91685	4.50511	4.38176	4.09415	4.1422	4.42822	4.38941
P91891	5.39901	5.34652	5.09122	5.06561	5.20791	5.05348
P91926	6.45314	6.45063	6.38641	6.38962	6.35708	6.26675
P91927	5.4056	5.23961	5.23015	5.17224	5.22051	5.13728
P91928	5.49906	5.48448	5.50112	5.35205	5.46063	5.44087
P91929	6.46763	6.49084	6.39814	6.23849	6.30899	6.26206
P91938	6.17846	6.18842	6.056	6.00699	5.97847	6.00703
P91941	7.45274	7.4731	7.61604	7.53836	7.7485	7.96066
P92177	7.41649	7.40494	7.38463	7.40184	7.42081	7.2992
P92181	5.41497	5.43647	5.50989	5.57484	5.51634	5.77193
P92208	6.20519	6.21522	6.15547	6.18703	6.07586	5.99305
P98081	5.17596	5.06109	4.99123	4.95906	4.6154	4.48792
P98149	4.92676	5.07515	4.87095	4.97762	4.61675	4.7375
Q00168	5.86885	5.85144	5.84111	5.71471	5.61069	5.39507
Q00174	5.26923	5.19205	5.11121	5.11035	5.00405	4.9332
Q00637	6.07281	6.07809	5.82013	5.82777	5.95172	5.74198
Q00748	5.43936	5.19028	5.0296	5.02539	5.07328	5.03431
Q00963	5.96866	5.89945	5.92067	5.85502	5.84782	5.84208
Q01603	4.66445	4.55341	5.00894	4.97924	4.86292	5.07309
Q01604	7.03983	7.0328	6.8404	6.8109	6.9591	6.74375
Q01617	6.69567	6.68472	6.68475	6.69495	6.62394	6.46669
Q01637	5.14957	5.12698	4.9872	4.86305	5.14862	4.81062
Q01819	5.84365	5.95807	5.63862	5.5936	5.82948	5.75423
Q01989	5.52359	5.45916	5.31029	5.2999	5.21955	5.18374
Q02427	5.96649	6.09369	5.98062	5.97656	5.16943	5.12099
Q02645	5.93496	5.89007	5.90713	5.94845	5.8691	5.85068
Q02748	6.356	6.36377	6.36293	6.38719	6.27975	6.15932
Q02910	6.47782	6.49582	6.74205	6.51932	6.40768	6.20211
Q02926	5.02383	4.95314	4.27613	4.81404	4.3663	4.29492
Q03017	3.76414	4.10762	4.06538	3.83583	3.62832	3.85577
Q03042	6.79141	NA	6.82844	6.92312	6.76408	6.30303
Q03043	5.41873	5.48034	5.2722	5.20207	5.19929	4.83015
Q03334	6.57125	6.61744	6.58267	6.55482	6.56263	6.39844
Q03427	5.87593	5.83465	5.62441	5.69457	4.89162	4.99734
Q03751	3.56752	3.60647	3.70413	3.354	3.62643	3.69115
Q04047	5.14879	5.04497	5.32639	4.85524	4.85054	4.60051
Q04164	4.20888	4.06897	4.44444	4.24757	4.69541	4.51854
Q04448	4.68897	4.7582	4.78088	4.55931	4.40719	4.67409
Q04499	6.31916	6.2038	6.04076	6.03608	6.23706	6.19722
Q04691	3.51657	4.55367	5.81019	5.17036	4.57379	3.76427
Q05547	5.98411	5.89519	5.7852	5.73119	5.85687	5.96971
Q05733	4.91171	4.93778	4.54468	4.56977	3.98667	3.90547
Q05783	3.28974	3.37342	3.66771	3.72783	2.89506	2.90079
Q05825	8.91387	8.91337	8.92058	8.78865	8.85511	8.84635
Q05856	5.36187	5.37482	4.83467	5.08783	4.93467	4.88522
Q059A4	5.35585	5.4047	5.16156	5.02897	5.32471	5.20955
Q06559	6.52282	6.63887	6.66889	6.63915	6.56139	6.37486
Q06943	4.03509	4.3913	4.16799	4.50191	4.34455	4.22301
Q07093	5.51377	5.53265	5.43047	5.41991	5.28888	5.26746
Q07152	5.61997	5.61961	5.94639	5.99352	5.8728	5.8978
Q07171	5.27719	5.39365	6.10597	6.0489	5.87139	5.70865
Q07327	6.03088	5.96103	5.91303	5.88742	6.06027	5.95935
Q08012	5.7015	5.74101	5.74581	5.69934	5.8196	5.8716
Q08473	5.05364	5.07026	5.21468	5.05112	4.89446	4.79606
Q08605	4.37382	4.3471	4.3315	4.35473	3.67635	3.17706
Q09101	4.73025	4.88893	4.75264	4.62963	4.41115	4.34654
Q09103	5.87106	5.87004	5.72283	5.68576	4.89955	4.84456
Q09332	5.68029	5.59553	5.49218	5.48449	5.54015	5.47953
Q0E8C8	5.62489	5.55067	5.52861	5.61622	5.53491	5.60732
Q0E8E8	6.61372	6.60237	6.2961	6.3004	6.46608	6.4351
Q0E8F2	4.84391	4.83738	4.57232	4.68537	4.77578	4.77785
Q0E8G6;Q9VSY2	5.52763	5.46985	5.22269	5.34121	4.27281	4.3193
Q0E8H7	5.92739	5.65662	5.6179	5.63777	5.65531	5.70893
Q0E8H8	NA	5.91079	6.14777	6.02847	5.94923	5.53131
Q0E8H9;Q8IRB6	5.67715	5.73969	5.89814	5.67521	5.83314	5.91693
Q0E8J0	4.66073	4.45991	4.53806	4.53669	4.23888	4.12164
Q0E8P1;Q9VIX6	4.24226	4.12231	4.23597	4.1219	4.30142	4.26382
Q0E8P5	4.76168	4.70417	4.9172	4.80468	4.98412	4.87193
Q0E8Q7	4.72941	4.55648	4.44901	4.42436	4.51929	4.52665
Q0E8S7	6.20291	6.24869	6.19988	6.08669	6.20876	6.10173
Q0E8T6	3.22503	3.09022	3.06787	3.17434	3.19535	2.97491
Q0E8U4	4.51124	4.43003	4.5701	4.33343	4.6813	4.74684
Q0E8V7	5.8234	5.97332	5.90592	5.74478	5.69349	5.58595
Q0E8X6;Q9W1Q8	4.90605	4.73698	4.81035	4.84941	4.61587	4.76533
Q0E8X7	6.35251	6.42782	6.24276	6.23425	6.27052	6.21028
Q0E8X8	5.40345	5.50025	5.37007	5.33382	5.26847	5.02739
Q0E908	5.13891	4.97102	5.02092	4.81707	4.86191	4.78411
Q0E931	3.57106	3.83828	3.4445	4.04076	3.17031	3.45796
Q0E940	5.76718	5.855	5.77953	5.78926	5.61853	5.50288
Q0E980	4.24618	4.0553	4.31787	4.25077	4.44943	4.5482
Q0E993	5.3059	5.31388	5.1967	5.17083	5.27206	5.08368
Q0E9A2;Q7JR72;Q95T77	5.46501	5.43436	5.01453	5.24449	5.61607	5.65631
Q0E9B5	4.75113	4.67026	4.56221	4.63624	4.70985	4.78183
Q0E9B6	6.688	6.83811	6.76422	6.71903	6.65474	6.566
Q0E9E2;Q7KN97	6.25826	6.26828	6.00259	5.96858	5.95809	5.86717
Q0E9F9	5.28402	5.35547	5.41662	5.16688	5.62312	5.35942
Q0E9G4;Q961L4	5.87377	5.95957	5.80926	5.7784	5.87623	5.96624
Q0E9H9	4.98369	4.8923	4.67587	4.6556	4.70668	5.00112
Q0KHN6	4.79028	4.62593	4.8448	4.45869	4.58503	4.65403
Q0KHQ1	5.86094	5.87887	5.78668	5.72187	5.3845	5.35317
Q0KHQ5	4.75201	4.75054	4.79282	4.912	4.63989	4.52378
Q0KHQ6;Q9VWH7;X2JED9	5.50414	5.47568	5.08982	5.13532	5.01326	4.60858
Q0KHR7;Q7KUX3	5.038	5.04145	4.98548	4.98339	4.93716	4.93275
Q0KHU0;Q9VZ45	4.09209	4.21104	4.41005	4.28375	3.64827	3.73118
Q0KHU5	4.75815	4.79346	4.59951	4.66154	4.72478	4.55721
Q0KHX4	4.55211	4.94909	4.5587	4.32949	4.42388	4.2174
Q0KHX7;Q9W5E8;X2J9Z8;X2JHS3	3.789	3.79983	4.02487	3.91183	3.74387	3.89788
Q0KHZ6	6.84764	6.83687	6.78951	6.70693	6.70833	6.75348
Q0KI00	5.09129	5.0926	5.34336	5.27856	5.36691	5.41988
Q0KI05	4.22276	4.43424	4.64469	4.14185	4.12964	4.29785
Q0KI15	5.24715	5.23194	5.31607	5.34401	5.10124	4.96946
Q0KI25	5.28291	5.2153	5.01855	4.87695	5.03154	5.09254
Q0KI39	4.54144	4.5689	4.68374	4.82071	4.64625	4.61459
Q0KI67;Q8INC3;Q9VEZ0	4.91165	4.90713	4.60954	4.64645	4.14086	4.34502
Q0KI81	4.83262	4.88993	4.89207	4.7194	4.95448	4.95422
Q0KI97	4.70757	4.52836	4.86273	4.76962	4.5027	4.60057
Q0KI98	5.12864	5.12384	5.03758	5.10501	4.92583	4.9366
Q0KIB3	5.56403	5.51923	5.54317	5.46043	5.4443	5.15669
Q0KIC3	4.55676	4.56768	4.51719	4.50545	4.23324	4.32717
Q0KIE7	5.47389	5.42399	5.42822	5.43016	5.25147	5.25644
Q0KIF4;Q8IMC2;Q9V4E5	5.05835	4.8213	4.86644	4.84427	4.91597	4.85512
Q10714	5.04841	5.08945	5.49662	5.43195	5.34403	5.36893
Q11002	5.55545	5.56333	5.43377	5.36726	5.40363	5.39874
Q1LZ08	4.78825	5.0272	4.75941	4.66307	4.88575	4.50524
Q1RL12	6.72434	6.99586	6.90365	7.01836	7.06417	7.01378
Q1WWB7	4.47518	4.62424	4.48632	4.56685	4.53493	4.23921
Q23970	4.83099	4.94132	4.93128	4.89283	5.22664	5.2356
Q23977	4.2106	4.1294	3.93613	3.82982	4.01831	3.98292
Q23978	4.29609	4.08669	3.92421	4.07578	3.88501	3.90832
Q23979	4.6723	4.68947	4.42626	4.27732	4.29988	4.43668
Q23983	6.20533	6.17411	6.14948	6.11627	6.21601	6.2161
Q23997	5.40963	5.59371	5.92897	5.65352	5.49181	5.32551
Q24008	5.74839	5.7593	5.59892	5.53967	5.55386	5.41566
Q24009	4.76211	4.60814	4.76217	4.77252	4.72215	5.12571
Q24020	4.45669	4.29891	4.31468	4.26585	4.36495	4.50697
Q24046	6.22637	6.18946	6.19895	5.95414	6.12239	6.05344
Q24048	6.22396	6.2402	6.21793	6.06022	6.22535	6.18774
Q24050	4.48462	4.48237	4.31294	4.30263	4.20437	4.29726
Q24062;X2J8B3	5.60089	5.38352	5.09532	5.05656	5.3001	5.10894
Q24090	4.50565	4.34096	4.70108	4.30929	4.25442	4.38123
Q24114	5.55946	5.49078	5.45087	5.43348	5.58985	5.39873
Q24117	7.2483	7.38826	7.13589	7.09202	7.05887	7.09851
Q24118	5.0076	4.81964	5.00887	5.01441	4.91337	4.88839
Q24133	5.00074	5.01281	4.86742	4.82898	4.62935	4.6294
Q24134	4.86007	4.79137	4.66262	4.59487	4.39599	4.33441
Q24139	5.80197	5.75511	5.4974	5.33758	5.61104	5.44321
Q24151	5.42111	5.50847	5.26147	5.31614	5.21572	5.08488
Q24154	5.56021	5.44867	5.51253	5.19676	6.20826	6.11741
Q24179	4.77484	4.68859	4.49895	4.70942	4.63445	4.48217
Q24185	4.62298	4.53579	4.46492	4.461	4.47943	4.32447
Q24186	6.94087	7.10771	7.09412	7.1202	7.0555	6.83095
Q24192	5.64826	5.70533	5.65318	5.67658	5.62469	5.4603
Q24207	6.19925	6.23667	6.28906	6.34258	6.0551	5.93954
Q24208	6.02744	6.03101	6.02464	6.13742	5.98241	5.95851
Q24210	5.05004	5.00654	5.0289	4.90175	4.92061	4.72383
Q24211	5.03214	4.96744	4.97148	4.81902	4.70854	4.76426
Q24212	6.0741	5.95795	5.84732	5.87833	5.98329	5.88518
Q24214	6.62595	6.58543	6.72565	6.47731	6.39294	6.45827
Q24238	3.52826	3.41967	3.40393	3.34264	3.49974	4.06213
Q24246	5.41399	5.40843	5.31644	5.4687	5.26313	5.23815
Q24247	4.20945	4.46041	4.34171	4.31694	4.48854	4.39383
Q24251	7.30595	7.36296	7.31266	7.12483	7.26792	7.22094
Q24253	6.24997	6.15394	6.1184	6.15157	6.0827	6.0014
Q24276	6.0857	6.03545	6.10321	5.97674	5.89499	5.92652
Q24297	4.8323	4.65111	4.87077	5.12447	4.64468	4.75617
Q24298	4.46513	4.49142	4.76161	4.50256	4.58284	4.67181
Q24311	4.58056	4.47967	4.68976	4.61618	4.61866	4.4318
Q24312	5.02216	5.07963	4.81611	4.78313	3.7392	3.7441
Q24314	5.2853	5.1903	5.1259	5.0717	4.82112	4.63847
Q24318	4.94881	5.02259	5.1712	4.77858	4.45435	4.6047
Q24319	5.84442	5.79937	5.90271	5.90841	5.80468	5.71623
Q24322	4.62181	4.64725	4.60277	4.50629	4.65237	4.74609
Q24324	4.7957	4.79718	4.87954	5.14259	4.65148	4.25651
Q24325	4.4497	4.30072	4.43847	4.22679	3.17483	3.28376
Q24337	4.30253	4.48758	3.30933	4.05016	NA	4.06724
Q24368	4.81404	4.7554	4.70662	4.6602	4.48476	4.40129
Q24372	5.71437	5.60589	5.76744	5.72089	5.82362	5.89877
Q24388	5.19089	5.60445	6.68094	5.89912	6.31689	6.06068
Q24400	4.89373	4.87987	5.12911	5.0722	4.11811	3.76076
Q24407	7.12788	7.27703	7.22138	6.99306	7.09909	6.87905
Q24418	3.85392	3.77197	3.56601	3.50421	3.76738	3.77716
Q24439	7.39663	7.37815	7.31242	7.19727	7.31411	7.23559
Q24451	4.34997	4.39285	4.0839	4.14867	3.98982	3.87609
Q24472	5.16896	4.95806	4.9131	4.9607	4.60605	4.59036
Q24478	5.44632	5.34041	5.4015	5.33603	4.70402	4.71563
Q24491	3.70039	3.94236	4.3933	4.17716	3.95124	3.75474
Q24492	4.95114	4.78025	4.69078	4.77416	4.54833	4.5562
Q24498	4.98515	4.89095	4.99968	4.83355	4.76715	4.63296
Q24509	4.82183	4.80473	4.90221	5.04242	4.82224	4.91565
Q24523	4.42484	4.33238	4.23737	4.45692	4.21723	4.13731
Q24524	5.24317	5.27055	5.14336	5.11166	5.13087	5.05826
Q24537	5.39682	5.47343	5.34012	5.2974	5.2633	5.20308
Q24546	5.99102	6.01554	5.99992	5.96575	6.13963	6.18037
Q24547	5.80624	5.65174	5.48636	5.48278	5.81818	5.77337
Q24560	8.35737	8.43031	8.28674	8.34434	8.28297	8.30202
Q24562	4.9945	5.11811	4.97523	5.045	4.68855	4.3775
Q24572	5.82191	5.79337	5.75805	5.80121	5.58852	5.55024
Q24574	4.98595	5.05723	4.74724	4.89469	4.93845	4.99665
Q24583	5.83242	5.77202	5.82443	5.65463	5.84225	5.59076
Q26307	5.52113	NA	5.11205	5.26627	5.31467	5.25363
Q26365	8.42197	8.45189	8.29196	8.1441	8.24147	8.12941
Q26416	7.20088	7.23852	7.41137	7.43066	7.45644	7.06962
Q26454	3.20335	3.20866	2.4443	3.03855	2.48492	2.48588
Q26459;Q8IQ63;Q9VRM5	4.75158	4.46949	4.809	4.68194	4.35385	4.40835
Q27237	4.53291	4.63118	4.53515	4.58725	4.02505	3.92104
Q27268	5.89794	5.94754	5.87456	5.88484	5.74303	5.64522
Q27272	4.645	4.42725	4.65428	4.77255	3.83036	3.66741
Q27331	7.11569	7.11593	7.04061	7.00581	7.20858	7.20329
Q27333	3.94211	4.10529	4.62881	4.63546	4.10084	3.26772
Q27367	4.48336	4.60674	4.32453	4.10888	4.58644	4.28488
Q27377	5.86328	5.82291	6.05315	5.90536	6.06819	6.1019
Q27415	5.8816	5.89645	6.23375	6.04943	6.04305	5.90383
Q27571	5.1192	5.11398	4.91746	4.80178	4.65851	4.84058
Q27580	6.02207	6.10779	5.88658	5.8902	5.96036	5.75896
Q27589	5.01055	4.75143	4.39179	4.69893	4.60043	4.38926
Q27593	4.21089	4.39719	3.88336	4.0527	4.9196	5.42741
Q27594	4.6122	4.59576	4.54382	4.43893	4.49229	4.21935
Q27597	5.43269	5.48527	5.35473	5.29049	5.31093	5.16142
Q27601	5.87875	5.87327	5.56571	5.50203	5.59318	5.22412
Q27606	6.0786	6.03492	6.06863	6.06157	5.90921	5.85795
Q27869	4.80864	4.7913	4.72577	4.6784	4.84515	4.85752
Q27884	4.66525	4.93478	4.7999	4.80874	4.64325	4.68498
Q27889	7.51717	7.44682	7.4923	7.42692	7.50914	7.61195
Q29QE1;X2J9V9;X2JC00	3.52169	3.41212	3.68886	3.4031	3.42488	3.44581
Q29QQ9	4.09578	4.27691	4.22975	4.16583	4.16441	4.12848
Q29QY7	4.25516	4.62962	4.27446	4.27552	4.50424	4.62801
Q2M1E6	4.53017	4.46067	4.52956	4.47372	4.0512	3.98931
Q2MGK7	4.52956	4.60574	4.44781	4.22801	4.40998	4.23457
Q2PDM3	5.21123	5.34476	5.41255	5.39621	4.86609	4.98863
Q2PDR0	5.14114	5.07937	5.40262	5.45529	5.62687	5.59165
Q2PDR9;Q7KT16	5.38999	5.35778	5.47639	5.47106	4.95376	5.01514
Q2PDW1;Q9VPT9	5.01387	4.94695	5.03507	5.01634	4.9873	5.3262
Q2QBM1;Q9VG31;Q9VG32	6.5882	6.70632	6.23262	6.20526	6.28388	6.00593
Q32KD4;Q7KY08	5.38477	5.27244	5.12622	5.16165	5.00773	4.91521
Q3KN41	5.17325	4.99957	5.08641	4.8951	5.15737	5.11276
Q3YMU0	6.08824	6.10285	6.16474	6.14071	6.03897	6.01651
Q3ZAN1	4.81228	4.64695	4.85852	4.73252	4.51891	4.72689
Q45VV3	4.69741	4.7667	5.14116	5.06712	4.84497	4.67548
Q494G8	4.8151	4.81722	4.65995	4.80453	4.65397	4.57704
Q494I2;Q9VWS3;X2JEA7;X2JFP6;X2JL40	4.09192	3.89704	3.81542	3.94659	3.57772	3.59148
Q494K2	4.48917	4.92756	4.54612	4.33169	4.61523	4.36778
Q4LBB9	5.83491	5.85246	5.72381	5.262	5.76057	5.58686
Q4LDP7;Q9I7R1	5.58556	5.45402	5.2813	5.16229	5.28937	5.18089
Q4QPR8	5.34339	5.56855	5.35352	5.25621	5.23996	5.05142
Q4QPU3	4.19718	3.72161	4.12892	4.46679	4.33629	3.8182
Q4U2G8;Q8IH56	4.78961	4.51813	4.42883	4.43321	4.54126	4.53591
Q4V429	4.82358	4.99221	5.06714	4.83286	4.85563	4.77354
Q4V5H1	5.67113	5.84182	5.87878	5.75691	5.70549	5.6563
Q4V5I9	4.75772	4.41112	5.11168	5.0416	4.97988	5.46562
Q4V625	4.75461	4.59481	4.52478	4.51493	4.71159	5.08462
Q4V645	5.19758	5.37251	4.93767	4.57982	5.05511	4.99747
Q4V6M1	5.0671	5.19593	5.09499	4.9385	4.98842	4.81302
Q4Z8K6	4.64471	4.64788	4.43413	4.38906	4.06758	3.90334
Q500Y7	6.92398	6.93591	6.36712	6.36951	6.40713	6.3896
Q58CJ5	4.78797	4.69143	5.08319	5.03328	4.76466	4.88271
Q59DP3;Q59DP4	4.99464	5.01918	4.98479	5.00704	4.4209	4.54476
Q59DP8	5.94884	5.69555	5.61737	5.87386	5.88041	6.19242
Q59DP9	4.85851	4.6816	4.14196	4.22215	4.57826	4.29569
Q59DW8	5.62509	5.59815	5.38718	5.33024	5.46801	5.39111
Q59E04	3.7691	3.65161	3.61997	3.9043	3.54777	3.67507
Q59E07	4.22834	3.94158	3.18477	3.27261	3.69893	3.72554
Q59E14	5.61895	5.32634	5.30245	5.18922	5.44	5.3253
Q59E36	5.11213	5.15871	5.01837	4.97496	4.73737	4.73877
Q5BI50	4.2715	4.264	4.12526	4.23491	4.1608	3.94034
Q5BI62	5.411	5.08273	4.85106	4.85787	5.33494	4.72396
Q5BIA9	4.78574	4.78964	4.53503	4.6167	4.83887	4.82756
Q5BIL9;Q95R73	4.47701	4.41363	4.44945	4.27108	4.4436	4.33471
Q5LJT3	4.87992	4.82213	4.54904	4.62155	4.63813	5.03731
Q5LJX8;Q7PLW1;Q8SXS9	4.85624	4.65356	4.69753	4.73341	4.85053	4.63846
Q5U0V7	5.81815	5.7758	5.70752	5.64898	5.61617	5.64302
Q5U117	5.60096	5.61938	5.58154	5.51916	5.40585	5.39928
Q5U124;Q8T0N3	5.24936	5.23504	5.14953	5.13181	5.27337	5.29526
Q5U126	4.60125	4.7097	4.63957	4.60749	4.63655	4.59619
Q5U191;Q7JQU9	6.06137	6.15278	5.99996	5.67832	5.89058	5.98063
Q5U1B0	5.4014	5.26374	5.1664	5.21869	5.61416	5.72771
Q6AWN0	5.34395	5.3671	5.2192	5.01442	5.31991	4.76451
Q6AWN6	4.90637	4.83989	5.18672	4.81131	5.2947	5.27104
Q6IDD9	4.82688	4.81668	NA	NA	4.74728	4.83524
Q6IDF5	6.56243	6.54113	6.25286	6.19958	6.43877	6.52952
Q6IGN6	5.71776	5.6585	5.62349	5.43082	5.16354	5.20328
Q6IGW6	5.36513	5.31681	4.99993	5.14177	5.14815	4.93971
Q6IHY5	6.6559	6.66044	6.40012	6.31094	7.5869	7.4057
Q6IIF2	5.34021	5.04313	5.35758	4.91406	4.93654	4.72256
Q6IJ53	5.51026	5.79205	5.57304	5.49865	5.56103	5.56872
Q6IKC0	5.2728	5.28533	5.49823	5.27221	5.42039	5.63968
Q6NL44	4.73452	4.80355	4.79717	4.70518	4.72684	4.79942
Q6NLA3;Q8IML4	6.22513	6.10107	6.0075	5.9524	6.17772	6.18367
Q6NLJ9	3.99236	4.25273	4.40916	4.13743	4.24308	4.35714
Q6NMY2	6.04948	6.53389	6.23394	5.57556	7.38142	7.06055
Q6NN40	4.52756	4.78561	4.33838	4.72071	4.53119	4.37668
Q6NNB2	4.06216	4.12217	4.11176	4.10858	4.222	4.19833
Q6NNF2	4.45236	4.42871	4.292	4.19872	4.21426	4.05503
Q6NNV7	7.518	7.41248	7.2817	7.26212	7.35079	7.35487
Q6NP60	4.21774	4.18279	4.36757	4.08692	4.47512	4.50679
Q6NP69	5.56255	5.66481	5.47847	5.70033	5.22261	5.40327
Q6NP72	6.34451	6.06046	6.12087	5.9769	6.28452	6.3158
Q6NP91	5.39619	5.36475	5.34306	5.31006	5.50878	5.55877
Q6NR46	4.5895	4.83635	4.30892	4.01056	4.15305	4.35986
Q6WV17	5.48708	5.56248	5.44128	5.19437	5.46201	5.28522
Q709R6	4.70142	4.40629	4.65186	4.35347	4.47978	4.41489
Q70PY2	5.15964	5.56368	5.02622	4.62745	5.37399	5.14059
Q76NQ0	5.65844	5.6466	5.60413	5.54221	5.439	5.3424
Q76NR6;Q9VYR1	5.93998	6.13121	6.4385	6.34142	6.54442	6.60896
Q7JMZ0	5.0544	5.01026	4.71007	4.79665	4.77278	4.61887
Q7JNE1	4.41966	4.36924	4.28534	4.46811	3.35797	NA
Q7JPS2	5.91737	5.71698	6.00318	6.08902	5.85095	5.71767
Q7JQH9;Q9V3K9	5.68305	5.51268	5.37916	5.38873	5.33726	5.21963
Q7JQR3	4.87209	4.91899	5.00497	4.6767	5.05041	4.89749
Q7JQW6	5.05205	5.0175	5.08205	5.08665	5.20027	5.12433
Q7JR49	5.21268	5.18039	5.61765	5.33371	5.45343	5.67615
Q7JR58	6.85118	6.92904	6.7505	6.76152	6.66798	6.50224
Q7JR71	5.13064	5.13505	5.26623	5.24295	5.46749	5.4555
Q7JR83	4.76582	4.78543	4.53764	4.41366	4.30243	4.59359
Q7JRA7	5.60368	5.26883	4.80538	4.84322	4.81888	4.49883
Q7JRB2	6.16275	6.15583	6.1769	6.12597	6.17545	6.04472
Q7JRC3	5.4289	5.47306	5.25796	5.22534	5.32674	5.16362
Q7JRF1;Q7JY00;Q86P32	5.72713	5.46086	5.82555	5.61985	5.6865	5.75517
Q7JRL9	5.91849	5.94135	5.95453	5.74644	5.9428	5.9771
Q7JRN6	5.28323	5.32465	5.81624	5.37312	4.47523	4.75063
Q7JS69	7.38873	7.25001	7.13211	7.10557	7.36165	7.3042
Q7JUN3	5.40754	5.08271	4.76878	4.93091	4.69325	5.0692
Q7JUN9	4.50694	4.63324	4.41358	4.438	4.30315	4.69252
Q7JUR6	4.55548	4.50323	4.22296	4.34233	4.10943	4.10887
Q7JUS1	4.05014	4.03451	3.37646	3.12798	3.69872	3.41836
Q7JUS9	7.3342	7.20833	7.1085	6.90154	7.11105	7.0393
Q7JUY7	4.97052	4.94787	4.83007	4.84392	4.87939	4.71844
Q7JV39	4.71084	4.66189	5.02293	4.71189	4.36927	4.05473
Q7JV41	6.75687	6.69648	6.58382	6.52689	6.82894	6.76887
Q7JV69	4.38102	4.25782	3.72632	4.24807	3.09882	3.93712
Q7JVG2	5.38842	5.19929	5.25837	5.32364	5.25895	5.20738
Q7JVG6	4.70767	4.60295	4.56353	4.598	4.78368	4.34982
Q7JVH6	5.80376	5.88481	5.44036	5.48498	5.59521	5.32476
Q7JVI3	5.40935	5.45995	5.44864	5.48563	5.39443	5.27858
Q7JVI6	6.24088	6.37047	6.33443	6.49842	6.30367	6.26455
Q7JVK1	5.10831	5.14322	4.97252	4.92109	5.02551	5.23253
Q7JVK6	4.51058	4.46165	4.47496	4.44783	4.47793	4.55924
Q7JVK8	5.44113	5.56347	5.74516	5.58873	5.54122	4.98549
Q7JVN6	5.78522	5.70026	5.48789	5.50419	5.55031	5.27867
Q7JVX3;Q9VCM8	4.94301	4.91158	5.57088	5.04389	4.52716	4.6611
Q7JVZ8	5.61367	5.74907	5.86715	5.87378	5.74943	5.71953
Q7JW03	5.55021	5.47745	5.49419	5.58257	5.36315	5.44027
Q7JW07	4.17549	3.69407	3.66445	3.58214	3.3852	3.5435
Q7JW12	5.73627	5.67636	5.76093	5.67989	5.64305	5.55114
Q7JWD3	4.98709	4.95266	4.71651	4.82852	4.71224	4.69009
Q7JWD6	6.22614	6.22062	5.88181	5.96119	6.04051	5.90149
Q7JWF1	6.03535	6.07746	5.92891	5.80956	5.64474	5.79797
Q7JWF7	5.50426	5.97949	5.49726	5.08128	6.77565	5.63125
Q7JWG9	6.06354	6.08375	6.26496	5.99908	5.89975	6.02151
Q7JWI7	4.71482	4.66547	4.16261	4.44259	4.51909	4.33895
Q7JWQ7	5.04681	5.09232	4.77248	4.89854	4.89139	5.01664
Q7JWR9	5.04894	5.20936	5.17277	5.16923	4.97773	4.89049
Q7JWS8	4.5698	4.33542	4.1366	3.9703	4.0531	3.93155
Q7JWV7	5.78919	5.69162	5.37439	5.55293	5.743	6.24825
Q7JWX3	5.36487	5.44241	5.53544	5.34408	5.14221	5.33178
Q7JX87	6.42898	6.40513	5.86341	5.89411	5.73895	5.57232
Q7JXA2	4.87107	4.82131	4.83617	4.85382	4.87527	4.65631
Q7JXB5	5.66626	5.76026	5.4602	5.54668	5.0743	5.00244
Q7JXB9	5.00138	5.00159	4.80539	4.92194	4.75483	4.71763
Q7JXC4	7.70198	7.7469	7.53227	7.50306	7.44382	7.44618
Q7JXC6	4.60311	4.69829	4.30283	4.19915	4.20436	4.18964
Q7JXE1	4.2635	4.16425	3.9923	3.90811	3.85792	4.05487
Q7JXF5	5.04399	5.06229	4.94668	4.96424	4.93845	4.73075
Q7JXF7	5.95482	5.892	5.84741	5.83349	5.8545	5.66721
Q7JXG9	6.78047	6.86235	6.80469	6.727	6.66689	6.51884
Q7JXU4	4.30799	4.08747	4.07381	3.89322	3.88893	3.91535
Q7JXV9	5.73333	5.79211	5.29746	5.26405	5.17796	5.08837
Q7JXZ2	6.27094	6.24064	6.19324	6.17138	6.38517	6.24026
Q7JY94	4.93675	5.05681	4.84224	4.79103	4.92382	4.87807
Q7JY99	5.11613	5.01509	4.74529	4.69714	5.02375	5.00245
Q7JYH3	6.54583	6.3953	6.31047	6.1892	6.40412	6.17197
Q7JYK2	4.07256	3.93423	4.19188	4.36839	4.06046	4.0878
Q7JYV2	5.56944	5.57333	5.69173	5.58518	5.60032	5.39935
Q7JYW9	6.43637	6.44192	5.95924	6.06973	6.21998	5.67778
Q7JYX0	5.62171	5.5316	5.25108	5.40298	5.61136	5.44173
Q7JYX2	5.22064	4.99442	4.77374	4.80006	4.55996	4.86727
Q7JYX5	5.12704	5.01514	4.89929	4.9113	4.88888	4.86718
Q7JYZ0	5.5357	5.55299	5.3899	5.54541	5.95125	6.17871
Q7JYZ9	5.66517	5.66458	5.29398	5.48741	5.70695	5.35747
Q7JZ25	4.98693	4.92977	4.73983	4.57396	4.96021	4.93251
Q7JZB1	6.0812	5.97081	5.49678	5.73893	5.16109	4.88448
Q7JZB4	5.02153	5.20755	4.97632	5.17087	5.17967	5.09009
Q7JZD3	5.20178	5.19843	5.17709	5.15741	5.07399	5.10278
Q7JZE1	5.71654	5.65823	5.49912	5.65013	5.61615	5.6698
Q7JZE8	4.43643	4.26156	4.29685	4.26535	4.63943	4.47526
Q7JZF5	4.59636	4.61294	4.6132	4.65085	4.26349	4.20209
Q7JZI2	5.94421	5.73904	5.83485	5.63963	5.99915	6.21256
Q7JZK1	6.69469	6.76063	6.53846	6.36418	6.39615	6.35641
Q7JZM8	5.01936	5.11207	5.13012	5.31072	4.88208	4.41005
Q7JZN0	6.30539	6.14432	6.10546	6.08744	6.14693	5.87875
Q7JZR5	5.7501	5.77825	5.63791	5.52301	5.50306	5.50942
Q7JZV0	5.74829	5.60407	5.93688	5.70025	5.25981	5.31615
Q7JZW0	4.69917	4.7566	4.8402	4.75845	4.8179	4.82411
Q7JZY1	6.0739	5.94571	6.06831	5.96497	6.15372	6.37645
Q7K010	5.40014	5.46071	5.28515	5.09748	5.57382	5.61094
Q7K012	5.76662	5.74338	5.81365	5.84013	5.49963	5.44034
Q7K084	7.9696	8.10733	8.42248	8.29617	8.29823	8.36546
Q7K0A0	6.75807	6.85883	6.80197	6.73692	6.5571	6.35762
Q7K0B6	5.33165	5.38438	5.17513	5.16768	5.25263	5.17544
Q7K0D8	4.95952	4.96944	5.00512	4.93113	4.3728	3.96876
Q7K0E3	5.54013	5.58632	5.673	5.61701	5.41257	5.43454
Q7K0E6	5.37339	5.48282	5.42425	5.4377	5.29078	5.26579
Q7K0F7	5.43936	5.38939	5.16177	5.17488	5.20087	5.02935
Q7K0L4	5.17098	5.1171	5.04467	5.03291	4.69234	4.82837
Q7K0L7	4.2946	4.14487	4.48666	4.12909	4.3478	4.42192
Q7K0P0	4.8641	4.74521	4.72387	4.54642	4.80504	4.758
Q7K0P4	5.08356	5.11105	4.73323	4.95078	4.89134	4.86996
Q7K0S1	4.82275	4.98242	4.6658	4.99683	4.92808	4.70951
Q7K0S5	4.92966	4.89664	4.82844	4.81557	4.67738	4.74615
Q7K0W1	4.81019	4.67176	4.50942	4.67219	4.5067	4.59415
Q7K0W4	5.34388	5.09566	5.0613	4.97596	4.2886	4.46038
Q7K0X3	3.70914	3.5391	3.23919	3.34346	3.22317	3.14088
Q7K0X9	4.48089	4.31302	4.38254	4.19822	4.69063	4.51494
Q7K0Y1	4.12186	3.9952	3.78533	3.71108	2.9219	3.34475
Q7K112;Q8IMX1;Q9VCB6	5.4415	5.35723	5.27961	5.31376	5.04948	5.02436
Q7K127	4.92338	5.06574	5.20181	5.06343	5.20425	5.16305
Q7K130	4.90089	4.81112	4.75412	4.84967	4.85321	4.7978
Q7K148	5.73344	5.77566	5.71742	5.80466	5.79061	5.78305
Q7K172	5.24735	5.05859	4.7617	4.78068	4.87291	4.92038
Q7K180	5.37536	5.46973	5.2502	5.26191	4.67669	4.84009
Q7K188	6.1147	5.84994	5.33854	5.35962	5.6722	5.8234
Q7K1C0	6.51614	6.53187	6.49634	6.2094	6.32665	6.24172
Q7K1C3	5.83191	5.76131	5.77311	5.64422	5.46241	5.17334
Q7K1C5	5.56369	5.49016	5.31605	5.21968	5.50074	5.33345
Q7K1D7	4.53985	4.27591	3.8839	3.9956	4.42533	4.506
Q7K1H0	5.14237	5.13471	5.17771	5.25044	5.2254	5.06574
Q7K1I4	7.09873	7.08072	7.00949	7.05977	7.31593	7.28247
Q7K1M4	5.27614	5.26054	5.11256	5.11825	5.1913	5.18919
Q7K1Q7	5.12276	5.09165	4.927	4.851	4.86355	4.65383
Q7K1U0	1.6875	1.86736	2.10671	1.46652	1.45745	1.60184
Q7K1V5	5.96858	6.01974	5.98067	5.9141	5.88791	6.01323
Q7K1W4	4.81575	4.59908	4.47536	4.53618	4.73048	4.5113
Q7K1W5	4.55277	4.53419	4.49929	4.26778	4.0334	3.97698
Q7K1Y4	5.96016	6.02706	6.07352	6.16059	5.91523	5.75917
Q7K1Z5	5.45519	5.55556	5.26459	5.27877	5.23356	5.31105
Q7K209	5.45801	5.41529	5.1072	5.10296	5.06833	4.74554
Q7K237	5.0827	5.08069	5.03446	5.05144	5.20105	5.08223
Q7K2B0	4.59007	4.41444	4.69651	4.51977	4.90485	4.528
Q7K2B1	5.15685	5.15244	5.27885	5.16153	5.18647	5.33259
Q7K2D2	5.36339	5.37501	5.44326	5.34889	5.35606	5.37257
Q7K2E1	5.87693	5.7445	5.59978	5.67138	5.71024	5.74764
Q7K2G1	4.92599	4.84943	5.1355	5.16618	5.12884	5.11953
Q7K2L7	5.48296	5.60676	5.67209	5.514	5.61296	5.70608
Q7K2N0	5.69666	5.63969	5.68248	5.57051	5.49341	5.41941
Q7K2N3	6.09349	6.07578	5.85355	5.80088	6.33525	6.18223
Q7K2P1	4.29393	4.64559	4.09135	4.02227	4.031	4.12995
Q7K2Q8	4.88573	4.81483	4.74863	4.80505	4.74231	4.59651
Q7K2V9	4.83186	4.81596	5.03309	5.00471	5.0776	4.96629
Q7K2W6	6.24915	6.26594	6.59888	6.28041	6.22368	5.97552
Q7K2X8	4.73404	4.97218	4.62013	4.80546	4.26248	4.18321
Q7K2Y9	4.95755	5.02113	4.72172	4.79415	4.53942	4.83189
Q7K332	6.00394	6.04929	6.21444	6.09452	5.92922	5.86692
Q7K3B7	5.4192	5.23995	5.26061	5.37091	5.31729	5.2595
Q7K3D4	6.09213	6.09641	6.1345	6.12877	5.97707	5.80018
Q7K3E2	5.47389	5.55796	5.85133	5.74761	5.72192	5.61176
Q7K3J0	6.16111	6.12704	6.1745	6.18769	6.12872	6.05936
Q7K3M5	4.77645	4.89119	4.80248	4.83703	4.57563	4.52583
Q7K3M6	5.89255	5.71844	5.47012	5.6046	5.32372	5.22286
Q7K3N1	4.69507	4.71282	4.40491	4.37595	4.62755	4.4119
Q7K3N4	5.87726	5.87462	6.09325	5.89775	5.8824	5.81112
Q7K3P0	4.90772	4.90332	4.60586	4.92589	4.88853	4.83542
Q7K3S3	4.88081	4.62701	4.46272	4.60987	4.57472	4.38524
Q7K3T3	5.30681	5.24637	5.45791	5.27795	5.02869	5.01268
Q7K3U4	5.48894	5.4662	5.25178	5.08896	5.39254	4.6327
Q7K3V6	5.39819	5.3772	5.52148	5.48738	5.04453	5.00684
Q7K3W2	5.79822	5.69844	5.80103	5.72898	5.74956	5.69646
Q7K3W4	5.69683	5.84187	6.24185	6.14858	5.99374	6.13249
Q7K3Y9	4.94134	4.96665	4.96442	5.00714	4.53832	4.41594
Q7K3Z3	5.33348	5.30611	5.41345	5.42393	5.40448	5.37862
Q7K483	4.28939	4.29873	4.11379	3.82321	4.40585	4.20848
Q7K485	6.19443	6.29954	6.20022	6.24161	6.32452	6.32775
Q7K486	5.23923	5.20185	5.04305	5.10667	5.18993	5.095
Q7K490	5.45967	5.66391	5.4555	5.3198	5.62938	5.63665
Q7K4B3	4.83941	5.02669	5.11884	4.76463	4.66539	4.7584
Q7K4C7	5.08161	5.07537	4.63611	4.79268	4.69337	4.69099
Q7K4G8	4.29712	4.47114	4.48013	4.77385	4.3256	4.07996
Q7K4H4	4.78695	4.73194	4.64741	4.53185	4.16306	4.08885
Q7K4L9	4.92304	4.72486	4.68271	4.78355	4.4961	4.45933
Q7K4N3	4.69458	4.55444	4.47004	4.55451	4.37877	4.39993
Q7K4Q5	4.98717	4.93024	5.11075	5.02254	4.9791	4.81226
Q7K4Q9	5.45606	5.48762	5.36194	5.42151	5.35713	5.31108
Q7K4T8	5.00165	4.99243	4.83138	4.8291	4.93603	4.99202
Q7K4Y0	5.7077	5.45592	4.21011	4.14002	4.40559	3.84829
Q7K4Y6	5.86581	5.98281	5.92197	5.5931	5.46191	5.59749
Q7K4Y8	3.95478	3.85555	4.36287	4.0255	4.12108	4.08975
Q7K4Z4	3.78307	3.58903	2.96663	3.36387	3.30902	2.97178
Q7K508	4.34671	4.32302	4.164	4.26816	4.70732	4.55665
Q7K511	5.02492	5.0398	4.78049	4.70731	4.60122	4.45533
Q7K519	5.50681	5.38417	5.35309	5.31261	5.15065	5.12655
Q7K527	4.76634	4.56162	4.8452	4.55861	4.7557	4.59202
Q7K533	4.93635	4.94602	5.18656	5.05638	4.46343	4.34292
Q7K549	4.24859	4.27304	4.43944	4.41116	3.64885	3.9616
Q7K550	5.14804	5.23341	5.06206	4.93114	4.99458	4.97573
Q7K556	5.79934	5.8131	5.88937	5.84755	5.77523	5.70836
Q7K561	5.00559	4.75791	5.14675	5.37572	4.91877	5.00368
Q7K566	4.30602	4.37715	4.46152	4.10711	4.23673	3.6326
Q7K568	4.763	4.70733	4.73028	5.16794	5.11373	5.02151
Q7K569	5.96045	5.91863	5.78986	5.65436	5.88307	5.78989
Q7K579	5.4877	5.30202	5.20645	5.15323	5.05045	5.02753
Q7K5J8	3.98584	3.97701	3.77017	3.68712	3.90893	3.87048
Q7K5K3	7.7903	7.88247	7.79961	7.65551	7.65089	7.60504
Q7K5M0	4.15015	4.21977	3.44333	3.48576	3.97524	3.86261
Q7K5M6	5.63696	5.60302	5.71098	5.55052	5.66109	5.62204
Q7K738	5.93564	6.00966	5.8246	5.78515	5.85836	5.73316
Q7K7G0;Q9W555	5.1562	5.16783	5.10866	5.08362	5.00475	5.07847
Q7K8X7	6.10345	6.1622	5.80274	5.97006	5.94422	5.68949
Q7K8Y3;Q7K8Y5	6.07	6.03997	6.26059	6.14118	5.68379	5.71743
Q7K9H6	3.47572	3.42066	3.23569	3.28363	3.25055	3.28931
Q7KB18	5.0659	4.95892	4.65849	4.75072	4.7528	4.49866
Q7KGH1	5.13585	5.02996	5.06875	5.14419	5.12674	4.96041
Q7KIS4	5.00298	4.98048	5.32737	5.09473	5.02283	5.09828
Q7KJ08	5.19545	5.13316	5.09336	4.90914	5.04089	5.18245
Q7KJ73	6.37175	6.4075	6.30216	6.31268	6.44507	6.28867
Q7KJA9	5.12969	5.00384	5.03021	5.13532	4.79563	4.85821
Q7KK51;Q8MLR7;Q9W1Q6	4.36554	4.44924	4.08126	4.12252	3.8688	3.73781
Q7KK90	5.77016	5.5692	5.20165	5.6376	5.73686	5.18327
Q7KKI0	5.5109	5.55482	5.60016	5.59923	5.5546	5.53507
Q7KLV9	5.31259	5.26643	5.43582	5.52968	5.42984	5.37214
Q7KLW9	5.20112	5.22589	5.05165	5.09846	4.98849	4.93616
Q7KLX3	5.94749	6.01356	6.0327	5.85472	5.8569	5.60854
Q7KM15	5.25718	5.25329	5.29644	5.31423	5.34705	5.10469
Q7KMJ6	5.31208	5.30269	5.24663	5.22503	4.39012	4.11595
Q7KML2	5.59495	5.57159	5.45307	5.54895	5.42058	5.46269
Q7KMM4	5.64115	5.6733	5.58384	5.58628	5.47743	5.45712
Q7KMP8	5.35608	5.29901	5.4218	5.6052	5.54461	5.42742
Q7KMQ0	5.73202	5.74639	5.93563	5.99858	5.89853	5.91455
Q7KMS3	5.91023	6.0371	6.38236	6.09693	6.29694	6.06959
Q7KN04	4.77703	4.74661	5.24665	5.06259	4.89715	4.92798
Q7KN61	5.32073	5.37803	5.62359	5.47416	5.26923	5.24622
Q7KN62	6.32584	6.33695	6.42931	6.45647	6.42032	6.417
Q7KN75	5.46193	5.47257	5.41187	5.43529	5.15699	5.08949
Q7KN85	6.37781	6.41639	5.97719	6.03088	6.11682	5.90891
Q7KN90	5.37084	5.3651	5.30254	5.3445	5.35461	5.26816
Q7KN94	6.75442	6.81895	6.80936	6.69654	6.61426	6.57528
Q7KNA0	5.26671	5.03911	4.72034	4.99672	5.09574	5.15547
Q7KND8	4.43863	4.38575	3.92984	4.06159	3.74307	3.59054
Q7KNF2	6.81136	6.88727	6.90522	6.86254	6.79495	6.4834
Q7KNM2	5.51481	5.61691	5.57579	5.53761	5.57764	5.52722
Q7KNR7;Q9VV42	7.35452	7.43334	7.3179	7.24834	7.32475	7.22403
Q7KNS3	5.37457	5.33087	5.15355	5.21889	5.13812	5.04447
Q7KQM6	4.88595	4.9778	5.08794	5.0749	4.62336	4.69555
Q7KR04	4.71576	5.07788	5.17748	5.1348	5.01555	5.21309
Q7KRI2	4.85939	4.92843	4.82965	4.88812	4.24147	4.20421
Q7KRT4;Q9VA06	5.493	5.55951	5.53996	5.54345	5.16638	5.01824
Q7KRU8	7.43177	7.53121	7.68367	7.59214	7.22954	7.03097
Q7KRW1	4.61653	4.57216	4.78852	4.68873	4.45343	4.58016
Q7KRW4;Q9VAP0	5.29224	5.13565	4.95399	4.95898	5.28209	5.12578
Q7KRW8	4.96833	5.09333	4.91073	4.81476	4.72265	4.76906
Q7KRY6	3.70983	3.60666	4.05171	3.74935	3.98612	4.08047
Q7KRY7	4.66556	4.60042	4.64663	4.50988	4.52031	4.60575
Q7KRZ3;Q9VBI4	3.58846	3.66633	3.75455	3.47225	3.35604	3.09149
Q7KS11	4.9198	4.97837	5.08566	5.10172	4.93039	4.99619
Q7KS34	5.40391	5.41199	5.39865	5.33018	5.43298	5.30511
Q7KSA4;Q9I7I6	5.09436	4.93765	4.87992	4.71804	4.8321	4.43238
Q7KSC4	6.40321	6.28634	5.46649	5.69366	6.04705	5.65764
Q7KSM5	6.02011	6.0071	5.99967	6.09514	5.91114	6.03209
Q7KSN8;Q9VGG9	4.81106	4.76901	4.73065	4.88155	4.63487	4.52214
Q7KSP6	5.06579	4.97589	4.57716	4.7617	4.50621	4.46477
Q7KSQ0	6.05847	6.11763	5.834	5.7931	5.67406	5.4889
Q7KSQ2;Q8INJ8;Q9VGK8	4.74275	4.71976	4.58578	4.70812	4.4817	4.54062
Q7KSW3;Q9VHZ5	4.94503	5.02295	4.79985	4.7696	4.70646	4.58713
Q7KT11;Q8SZU0;Q9VIJ0	5.67223	5.68954	5.54283	5.50831	5.69174	5.39385
Q7KT70	4.84065	4.64203	4.67007	4.69269	4.90009	4.87154
Q7KT91	4.92615	4.97497	4.80271	4.80406	4.8354	4.7553
Q7KTA1	5.10787	5.36362	6.07016	5.66398	5.63644	5.68368
Q7KTB3;Q8IP79;Q8IP80;Q9VK25	5.43125	5.39432	5.2761	5.2731	5.17034	5.03907
Q7KTC0;Q9VK56	5.54819	5.44147	5.4112	5.32767	5.48502	5.31622
Q7KTG0	5.18453	5.12842	4.94046	5.07589	4.70705	4.71601
Q7KTG2	5.36814	5.4654	5.46633	5.1489	5.25839	5.14918
Q7KTG5;Q7KTG6	NA	NA	4.34325	NA	4.64687	4.49883
Q7KTH8	5.19653	5.15283	4.93366	4.91559	4.87575	4.70478
Q7KTI0	4.23693	4.35961	3.51522	3.45018	3.50795	3.2265
Q7KTI1;Q8MSR2;Q9VLM3;Q9VLM4	4.07648	3.95045	3.78046	3.76392	3.77219	4.06154
Q7KTI7	4.45487	4.39159	4.28325	4.04548	4.38889	4.18915
Q7KTJ7	5.40291	5.38675	5.37806	5.31598	5.43576	5.41321
Q7KTP7	5.08009	5.07723	5.10247	5.07799	5.00756	5.14357
Q7KTS3;Q9VNC9	4.27852	4.09683	4.2084	3.99741	4.52124	4.26387
Q7KTU2	5.54189	5.35266	5.40716	5.39934	5.4104	5.30255
Q7KTW5	6.02415	5.98148	5.96441	5.89522	5.92606	6.04298
Q7KTW9	5.42861	5.61982	4.8246	4.82342	5.04892	4.60881
Q7KTZ2	3.81228	4.19309	3.92511	3.75738	3.8915	3.81007
Q7KUA4	5.81484	5.78861	5.78879	5.81333	5.83078	5.79947
Q7KUC2	6.17605	6.24319	6.13879	6.08172	6.04921	5.93619
Q7KUD4;Q9VT60	5.17752	5.13377	5.10369	5.05981	5.05042	4.81185
Q7KUD5	4.95607	4.89729	5.25688	4.75664	3.99747	4.14196
Q7KUK9	4.34077	4.35407	4.18948	4.11293	4.1641	3.98302
Q7KUT2	5.38144	5.29841	5.21595	5.18868	5.15975	4.99242
Q7KUT5;Q9VW41	4.23049	4.18782	4.49192	4.37568	4.3454	4.16526
Q7KUX7;X2JC79	5.3956	5.42626	5.59666	5.76335	5.13877	5.04325
Q7KV26;Q9VYE6;Q9VYE7	4.33512	4.43669	4.06557	4.11951	4.25635	3.88559
Q7KV27;Q9VYD9	6.88772	6.91518	6.73948	6.76266	6.86655	6.83169
Q7KV34	6.07459	5.99206	5.76131	5.83708	5.76308	5.74672
Q7KV69	5.01011	4.88598	4.73808	4.71749	4.56594	4.64689
Q7KV84;Q8I939;Q8I940;Q9VZV9	3.70059	3.39659	3.17704	3.36489	2.91975	3.15934
Q7KVB1;Q9W0C5	5.16056	5.117	4.93783	4.90924	4.9112	4.86817
Q7KVD1	4.96669	4.88542	4.77366	4.81501	4.69132	4.37804
Q7KVF6	5.16126	5.25993	4.9899	5.00271	4.9377	4.95875
Q7KVI9	5.46037	5.31783	5.30037	4.92779	5.21938	5.17128
Q7KVJ6;Q9W1W0	4.88162	4.98034	4.72775	4.86831	4.64934	4.7199
Q7KVL7;Q9W277	5.96396	5.96395	5.88142	5.92645	5.87319	5.82249
Q7KVQ0	4.59669	4.68845	4.79927	4.71456	4.52039	4.27708
Q7KVQ8;Q9W2T2	5.52316	5.57025	5.09083	5.13586	4.86368	4.84003
Q7KVR8;Q86B59	5.57851	5.51389	5.28028	5.32479	5.3267	5.22414
Q7KVT8	4.54927	4.41605	4.28003	4.34907	4.26955	4.36584
Q7KVW1;Q9W4C4	4.33589	4.07156	3.89806	4.15606	4.12266	3.66672
Q7KVX1;Q9W4H6	6.94633	6.93298	6.90057	6.81046	6.79728	6.79542
Q7KVX5;Q9W4N8	6.67122	6.57538	6.68651	6.5886	6.51429	6.50466
Q7KVY7	4.15476	3.7755	3.86358	3.68532	3.84976	3.65573
Q7KVY9;Q9W4Z0	5.04106	5.03401	5.08682	4.98794	4.59087	4.62688
Q7KW14	3.47414	3.37709	3.64445	3.75405	3.66446	3.43205
Q7KW39	5.9735	5.97348	5.79276	5.76957	5.70844	5.72682
Q7KY04	5.90738	5.77239	5.79061	5.83389	5.72544	5.6868
Q7PL76	3.36501	3.42441	2.85091	3.19875	3.29512	2.8743
Q7PL91	6.39212	6.47993	6.19365	6.10932	6.17966	6.06592
Q7PLE6	5.52536	5.63942	5.43352	5.50033	5.25238	4.78866
Q7PLG1	4.15614	4.03947	4.06419	4.14828	4.20147	3.95961
Q7PLI0	5.05533	4.99536	4.90577	4.92196	3.93682	4.67604
Q7PLI2	4.46967	4.2101	4.34891	4.09251	4.04182	3.77465
Q7PLI7	5.37231	5.30796	5.40321	5.31682	5.02916	5.01955
Q7PLL3	4.98094	4.99967	5.02233	5.01911	4.79893	4.77062
Q7PLL6	4.71119	4.72318	4.83827	4.91766	4.67282	4.54066
Q7PLS1	5.83636	5.78692	5.64463	5.64987	5.54373	5.60756
Q7PLT4	6.22011	6.11725	6.26131	6.19504	6.12251	5.81227
Q7PLV6	4.77666	4.74656	4.46392	4.94335	4.80225	4.70382
Q7YTY6	5.1994	5.22231	5.16134	5.36091	5.26461	5.32937
Q7YTZ0;Q9VTD7	6.00308	5.85101	5.68224	5.58798	5.86843	5.82834
Q7YU24	5.84221	5.77127	5.74563	5.62391	5.55065	5.55176
Q7YU80	3.63945	3.46797	3.78089	3.65269	3.56639	3.60845
Q867Z4	4.44749	4.46064	4.3194	4.33494	3.13604	3.19822
Q868Z9	4.69108	4.8397	5.16212	4.97528	5.07121	4.94601
Q86B44	4.09409	3.59415	3.87236	3.89619	4.22329	3.97187
Q86B46;Q9VX51	5.03082	5.1439	4.95582	4.95234	4.91265	4.91276
Q86B54	5.9707	5.85477	6.16186	6.12476	5.94743	5.95989
Q86B61	5.1943	4.94896	4.63268	4.54001	4.90031	4.80402
Q86B74;Q9VAT0	4.85868	4.92421	4.99792	4.86877	4.74858	4.89027
Q86B87	3.93282	3.99439	3.81	3.4808	3.11209	2.7876
Q86BA1	4.49046	4.49852	4.54647	4.28775	4.31577	4.31687
Q86BG8;Q961L8	4.55499	4.51457	4.06985	4.14214	4.18243	4.09319
Q86BH5	5.2491	5.23837	5.78158	5.71605	5.60191	5.71957
Q86BI3	4.64354	4.62326	4.63721	4.60212	4.37317	4.0335
Q86BK8	4.77391	4.66769	4.54918	4.70074	4.60781	4.68007
Q86BM0	5.32847	5.26513	5.06657	4.93546	4.98936	4.852
Q86BM5	3.80643	3.79205	3.37644	3.76695	3.67645	3.22305
Q86BM8	5.64389	5.72949	5.52529	5.43272	5.44625	5.51266
Q86BN8	4.47647	4.55603	4.58008	4.28102	4.52191	4.24279
Q86BP1;Q960K8	5.61263	5.55763	5.51545	5.49724	5.57074	5.31301
Q86BQ4;Q8STA5	5.68349	5.80101	5.6289	5.53424	5.4724	5.37057
Q86BR8;Q9VDL2	5.01147	5.01891	4.90539	4.75554	4.71004	4.76059
Q86BS2;Q960F7	3.79208	4.07718	3.61668	3.63911	NA	3.30069
Q86BS3	5.1396	5.05033	4.98973	4.83341	4.22768	3.99244
Q86BS7	5.83232	5.84837	5.65998	5.63416	5.85418	5.57872
Q86NP2	4.5227	4.4142	4.15943	4.06711	3.77277	4.00788
Q86NW1;Q8IH57	5.05152	4.94438	4.81447	4.85421	4.89121	4.97769
Q86P18	5.46724	5.35643	5.25633	5.22001	5.25571	5.23494
Q86PD3	6.07498	6.13761	6.12146	6.064	5.95186	5.73741
Q86PF4;Q9VG23	5.22324	5.21784	5.30163	5.28512	5.08839	5.32507
Q86PF5;Q8SY07;X2JDZ1	5.20216	5.26538	4.84173	5.07443	4.76074	4.90589
Q86S05	4.65554	4.51993	4.67244	4.86404	4.54956	4.48883
Q8I099	5.60598	5.66198	6.21786	6.09796	5.98611	6.24883
Q8I0D4;Q9VFR2	6.49907	6.60253	6.51971	6.38582	6.50769	6.47899
Q8I0G5	5.49623	5.47605	5.45206	5.47097	5.27448	5.26857
Q8I0J1	4.74548	4.719	5.8904	5.0983	4.99175	4.67176
Q8I0J3	4.47937	4.46163	4.29927	4.41429	4.18725	4.08077
Q8I0P9;Q9VAD0	5.24597	5.27875	5.29317	5.30741	5.16406	5.19346
Q8I725	5.66928	5.60132	5.79415	5.79352	5.82688	5.75525
Q8I7C3	5.18909	5.16303	5.10878	5.06235	4.94517	5.02231
Q8I930	5.27023	5.03162	4.87846	4.68985	5.01658	5.09809
Q8I941	5.35783	5.34588	5.20831	5.19652	5.09122	5.05952
Q8IGI1	5.38124	5.25017	5.45609	5.45162	5.41561	5.42833
Q8IGJ0	4.87319	4.7343	4.53014	4.32567	4.54774	4.64147
Q8IH18	4.72406	4.45966	4.83647	4.65508	4.28893	4.2201
Q8IH23	4.48551	4.6529	4.9924	5.16587	4.8363	4.58513
Q8IM93	4.69515	4.82283	4.96815	4.79545	4.63198	4.53195
Q8IMC6	5.22011	5.17907	4.91078	4.90186	4.68445	4.45514
Q8IMG1;Q9V9U3	4.26805	4.12199	4.0506	3.99323	4.35163	3.98619
Q8IMJ0	5.53036	5.28373	5.23782	5.0818	5.25639	5.32114
Q8IMK7;Q961C5;Q9VAK1	5.98191	6.0494	6.04822	5.8785	5.72837	5.74319
Q8IML5	5.62593	5.61089	5.82292	5.63597	5.72375	5.67702
Q8IMQ8;Q9VBA0	6.00798	6.08145	5.99871	6.00944	5.97718	5.97473
[truncated: 2,608 more rows]
