# Supplementary material for: miR-34 regulates stress-induced depression-like state through the WDR26 ortholog melancholy in Drosophila
Source: Research Square preprint supplement (doi:10.21203/rs.3.rs-9339604/v1), 2026-04-08
Supplement: Supplementary file 3 [file f2867926f052096ba2474016.xlsx]

## Sheet: Sheet1
kmeans_clusters_5_sig
Protein	Cluster
M9MRX0	1
A8JQT5	1
Q9VC87	1
Q9VAW1	1
Q9W403	1
Q9W1H5	1
M9PFE5;M9PFI2;Q961X4;Q9VU76	1
Q9VE85	1
Q7JVX3;Q9VCM8	1
Q9V3T8	1
M9NCP5;Q9VPY9	1
M9PET3;M9PF79;Q0E8G1;Q960V1	1
P02283	1
Q8ING0	1
Q7K533	1
P18091	1
Q27333	1
Q9VVV8	1
Q05783	1
Q8IR95	1
Q9V4C1	1
A1Z8P9	1
Q9VDG1	1
C0HL66;C0HL67;P02299	1
A1ZB61	1
Q9VIQ5	1
A0A0B4KFF6;A8DY77;Q7K304	1
A8JQV7	1
Q9VT61	1
M9PDB4	1
P91621	1
Q9VK39	1
Q9VMC8	1
Q9VP13	1
Q9VQT5	1
Q9VN39	1
A1ZA47	1
Q24400	1
Q8MSW9	1
Q9VPU6	1
Q0KHU0;Q9VZ45	1
Q9VUV8	1
Q9V4T5	1
A1Z8M2;A8DYA3	1
M9PBA3	1
Q9VQT6	1
Q9V9S7	1
Q27272	1
Q8INK9	1
A0A0B4K7K9;A8DY79	1
Q9VYV6	1
P84051	1
Q9VAI9	1
C0HK92	1
Q8IQQ3	1
D3DMM0;Q2PDT4;Q8INW7;Q9VIX2;Q9VIX3	1
Q7JV39	1
Q9VAI6	1
O97183	1
Q9VHC0	1
Q7K549	1
Q9VJ12	1
A0A0B4KG96;Q9N6D7	1
Q9VBF3	1
Q9VF66	1
A1Z9M5	1
P84040	1
Q7JRN6	1
Q9V674	1
Q7KUD5	1
A8Y596;A8Y599;A8Y5A0;Q7PLC6;Q7PLC7	1
Q8IPB7	1
Q9VVC0	1
P35415	1
Q7KUX7;X2JC79	1
Q9V3Y7	1
Q7KK51;Q8MLR7;Q9W1Q6	2
Q9GQN5	2
Q7K4H4	2
Q7K2X8	2
Q9VUW1	2
E1JI59;Q6U9V3;Q7KTX2;Q9VP80	2
Q9W3M3	2
Q7KRI2	2
M9PGW8;Q8IR86	2
Q4Z8K6	2
Q9VN91	2
A1ZA22	2
Q9VKQ9	2
Q9W0C3	2
Q9W0P5	2
Q9W060	2
E2QCZ0	2
Q7JXB5	2
Q9VLK2	2
O62602	2
Q27237	2
P05812	2
A0A0B4LFQ3;A0A0B4LFV0;A0A0B4LGY8;A1ZBH7;A1ZBH8	2
Q9VL67	2
E8NHA2;Q9W0H2	2
Q9VIT5	2
Q8IQV9	2
A0A0B4LH25;A8DYK5;Q9W2K4	2
Q9VFJ0	2
Q7K0D8	2
P82712	2
Q9VBS3	2
P02844	2
Q9VV28	2
Q9VEY4	2
Q9VAA9	2
Q9VY42	2
A0A0B4KER0;Q5U156	2
Q9VV49	2
Q8MM39;Q8MM49	2
M9PF85;Q7JVP2	2
A1Z6G9	2
A0A0B4KFB8	2
P06607	2
Q8MYW9	2
A1ZAZ2	2
Q9W420	2
A0A0B4LF29;A0A0B4LFC7;A0A126GUP1;A1Z9M3;A1Z9M4;A8DYD1;A8DYD2;A8DYD3;B7YZE6;Q7KHK4	2
Q24478	2
Q9VCD8	2
Q9VHM3	2
Q9V463	2
Q9VMR6	2
Q9VT41	2
O76994	2
Q24312	2
Q9W0T1	2
M9PG20;M9PG82;M9PID3;Q9VPB0	2
Q9VZK4	2
E2QCS8;M9PE28;Q9VQ76	2
A0A6H2EFG8	2
Q09103	2
Q0E8G6;Q9VSY2	2
Q24325	2
A8JNQ4;M9NFQ7	2
Q9VZV5	2
E8NH67;Q9W5X1	2
Q9W3E2	2
A1Z9E2	2
Q94883	2
M9MSI3;Q9V3G8	2
A0A0B4K6K8;A0A0B4KGY9;A0A0B4KHV4;Q8IMS8;Q9VBQ1	2
Q8MRT7	2
Q86B87	2
Q9VEA2	2
L0MPZ1	2
Q7K0W4	2
Q9VD48	2
Q9VXC1	2
M9NDG8;Q9VM80	2
Q9VGF1	2
Q9W4W4	2
Q9VKK1	2
P0DKM0	2
A0A126GUM1;A0A6M3Q7H0;A1Z8A4;A1Z8A6;Q7K0T7	2
A1ZAX6;A1ZAX8	2
Q867Z4	2
Q9VP57	2
Q9VZ00;X2JEU3	2
R9PY51	2
Q7K180	2
Q9V460	2
A8E6R2;Q9VNR7	2
Q9V3W7	2
Q9VJC7	2
Q9VP78	2
M9PF96;Q9VWC8	2
P08985	2
Q8T0N5	2
Q9V3V0	2
Q9VKJ3	2
Q9V771	2
Q9VXE6	2
Q9W437	2
Q7KMJ6	2
Q9VWJ6;X2JFR5;X2JL73	2
Q9VRP9	2
O01939	2
A1Z6H7	2
Q7K0Y1	2
Q9VWP5	2
A8JUZ6;Q9W426;X2JAM0;X2JCR6	2
A0A126GV33;Q9VA29	2
A1YK02	2
Q9V466	2
Q8T3L6	2
Q9VKV6	2
Q86BS3	2
Q9VRY5	2
Q9VSH4	2
Q9VXE3;X2JC83;X2JE40;X2JKQ8	2
Q9W3K6	2
Q9VE01	2
B7Z005;E1JHR0;Q9VPU3	2
Q9V9L1	2
P05552	2
A1Z782;A1Z783	2
Q8IQS5	2
Q8IMC6	2
Q9VTY1	2
Q8MSB1	2
Q8MSS1	2
Q94915	2
P35416	2
Q9VMJ7	2
Q02427	2
Q05733	2
Q9VU75	2
Q9XZ06	2
A0A0B4K765;A0A0B4LF82;A0A0B4LF93;A0A126GUN9;A1Z927;A1Z928;Q5U0Y0	2
Q9W4Z1;X2JI50	2
P08266	2
Q08605	2
Q9VTN9	2
A0A0B4K6X5	2
Q9VCW3	2
Q9VGA4	2
Q9VU95	2
P02843	2
Q8INQ9;Q8INR0;Q9XYA7	2
O46040	2
A1Z8D3	2
O76895	2
M9PBY3;M9PEK7;M9PEU6;M9PF18;M9PHU7	2
Q95U34	2
Q7JZB1	2
F3YDK4	2
Q0KI67;Q8INC3;Q9VEZ0	2
Q03427	2
Q9W136	2
Q9W542	2
E1JGK8	2
Q9VFL5	2
Q9W1F4	2
A1Z6Q0;A4UZ58	3
Q9VIQ8	3
A1Z8Q0	3
P00408	3
Q9VMS1	3
Q9VT15	3
Q6IHY5	3
Q9VPR3	3
Q9VT23	3
Q59E07	3
Q9VVK5	3
P20240	3
A1ZBB4;A8E6M1;E1JGL8	3
A0A0C4DHE7	3
Q9VB86	3
Q9VJ45	3
Q9VVG5	3
P08144;P81641	3
Q9V9U0	3
Q9VGT8	3
Q9VHS2	3
Q9W1N3	3
Q27593	3
Q9I7D3	3
P02572	3
A1ZAL1	3
Q24154	3
Q6NMY2	3
D0IQJ8;M9PG83	3
Q7K188	3
Q8IN51	3
Q9W0Y2	3
A1Z7G2	3
Q7K5M0	3
Q9VWD1	3
Q8SXX2	3
Q8IQ80;Q8IQ82	3
Q8SYJ2	3
Q7JYZ0	3
Q59DP9	4
P42281	4
Q9VFC8	4
Q9W247	4
A0A0B4KHW3	4
Q9W043	4
Q9VZL6	4
E2QCN9	4
Q961D1	4
Q9VLG9	4
Q9VF53	4
Q9VLT7	4
Q9VP61	4
Q9VQY4	4
Q02926	4
E1JI91;Q9VSW1	4
Q7KSC4	4
Q9W1E9	4
Q9W3L4	4
Q9VPR0	4
O77436	4
A0A023GPN7;A4V4N7;B7Z0Z5;B7Z0Z6;M9NFA0;Q9VXC4;X2JC90;X2JFS7	4
Q9W2J3	4
A1Z992	4
A0A0B4K7Y4;A0A0B4KFL2;A1Z9D9;A1Z9E0	4
A0A0B4JD38;A0A0B4K738;A0A0B4KEJ9;A0A0B4KEQ3;A0A0B4KF87;A0A0B4KFK3;A0A0C4DHC4;A8DY93;A8DY94	4
Q7KND8	4
P11929	4
Q8IRD6	4
A1Z893	4
Q9V9W4	4
Q7KTW9	4
Q9W3W7	4
Q9VC49	4
P19967	4
O77086	4
Q8IN43	4
Q9VIV2	4
Q9W513	4
A1ZAN2;A4UZL2;A4UZL3;B7YZI1	4
Q9VR50	4
P02517	4
P02825;P82910	4
Q9VCY8	4
Q7KTI0	4
A0A0B4KI23	4
E1JJH5	4
Q9VAU5	4
P02516	4
Q7JUS1	4
Q9VKJ8	4
Q9VQC4	4
Q9W5B5	4
P91657	4
A1Z784;Q7JV23	4
B7Z001;Q9VQL7	4
A1Z8N1	4
Q9VIW6	4
Q9V8I2	4
O97479	4
Q8MSI2	4
Q9W095	4
P02515	4
Q7K4Y0	4
Q9V4C0	4
P82713	4
Q9V6H1	4
M9MSK4	4
Q9VBR6	4
O97125	4
Q9VVM8	4
Q8IN44	4
Q9W0D6	4
Q9W196	4
M9PC43	4
Q9W0H9	4
Q9W452	4
Q7JRA7	4
Q967S0;Q9VRZ1	4
Q9XZS3	4
P02518	4
Q9VP52	4
Q9VHF5	4
Q9VZ66	4
Q8IRI5	4
Q8MKW7	4
A1ZBU8	4
Q9VRJ6	4
Q9W551	4
A0A4P1SA55;Q8IPA2	4
Q9VP02	4
Q9I7S8	4
O76767	4
Q0KHQ6;Q9VWH7;X2JED9	4
P36958	4
Q7KVQ8;Q9W2T2	4
Q7JXV9	4
Q9VA02	4
Q7JX87	4
Q9W4A6	5
Q9VXF9	5
Q9VHP0	5
Q8T8R1	5
Q9VIX7	5
P14318	5
Q9V359	5
Q9VI25	5
Q8IPH6;Q8IPH7	5
Q8IR72	5
Q9W278	5
B7Z0L0;B7Z0L1	5
P48596	5
Q8IQU1	5
A0A0C4DHB3;A8JR16;A8JR17	5
O76879	5
Q9VM07	5
P07909	5
P54398	5
E1JHJ3	5
Q9VG74	5
A0A0B4LGB7	5
Q9VFR3	5
Q9VHH0	5
Q9W3U0	5
P26802	5
P47949	5
Q9W2J5	5
Q9VZQ7	5
M9NH88;M9PJQ5	5
B7Z100;B7Z103	5
P54195	5
Q9I7J0	5
Q9NBW1	5
Q7KTA1	5
C0HK95	5
A0A0B4K7H1;A0A0B4K819;A1Z6P2	5
Q9VEX9	5
Q8IPG8	5
Q9W370	5
P20007	5
Q07171	5
